# Supplementary material for: Large-scale cascade cooling performance evaluation of adsorbent/water working pairs by integrated mathematical modelling and machine learning
Source: Royal Society of Chemistry journal article supplement (doi:10.1039/d1ta11023c), 2022-01-01
Supplement: d1ta11023c1.pdf [file d1ta11023c1.pdf]

## Supporting Information

# Large-scale Cascade Cooling Performance Evaluation of Adsorbent/Water Working Pairs by Integrated Mathematical Modelling and Machine Learning

Zhilu Liu <sup>a</sup>, Wei Li <sup>b</sup>, Shanshan Cai <sup>a</sup>, Zhengkai Tu <sup>a</sup>, Xiaobing Luo <sup>a</sup> and Song Li <sup>a,\*</sup>

<sup>a</sup> School of Energy and Power Engineering, Huazhong University of Science and Technology, Wuhan 430074,  
China.

<sup>b</sup> Energy & Electricity Research Center, Jinan University, Zhuhai 519070, China.

\* Corresponding author email: songli@hust.edu.cn.

### Table of Contents

| Contents                                                                                       | Page Number |
|------------------------------------------------------------------------------------------------|-------------|
| S1. Supplementary tables in an Excel file                                                      | 2           |
| S2. Computation details of cooling performance based on the ideal isosteric diagram of<br>cACs | 3-4         |
| S3. Cooling performance of adsorbents/water working pairs for cACs                             | 5-8         |

## S1. Supplementary tables in an Excel file

**Table S1.** The number of adsorbents with reported structural properties in the literature

| Species                    | Adsorbents No. | Adsorbents No. with Reported Structural Properties |                            |           |
|----------------------------|----------------|----------------------------------------------------|----------------------------|-----------|
|                            |                | $S_a$ (m <sup>2</sup> /g)                          | $V_a$ (cm <sup>3</sup> /g) | $D_p$ (Å) |
| Carbon materials<br>(Carb) | 37             | 31                                                 | 33                         | 17        |
| COFs (C)                   | 57             | 55                                                 | 31                         | 33        |
| MOFs (M)                   | 176            | 107                                                | 78                         | 111       |
| POPs (P)                   | 30             | 28                                                 | 26                         | 12        |
| Zeolites (Z)               | 11             | 7                                                  | 7                          | 4         |
| Sum                        | 311            | 228                                                | 175                        | 187       |

**Table S2.** Source of literature corresponding to 311 adsorbents studied in this work.

**Table S3.** Fitting parameters of 311 water adsorption isotherms using universal adsorption isotherm model.

**Table S4.** Structural characteristics of adsorbents collected from the literature.

**Table S5.** Adsorption properties of adsorbents in the high-temperature stage (HS) and low-temperature stage (LS).

**Table S6.** Cooling performance of adsorbent/water working pairs in cascaded adsorption chillers (two-stage, TS).

## S2. Computation details of cooling performance based on the ideal isosteric diagram of cACs

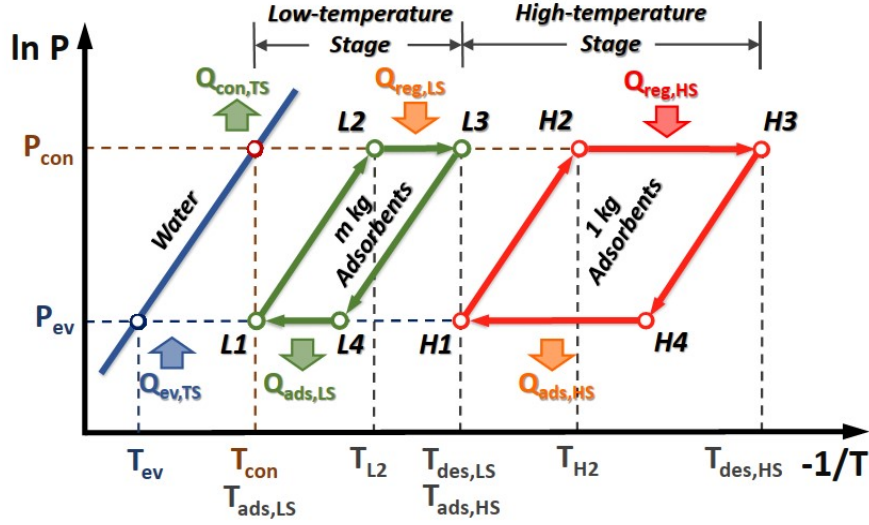

**Figure S1.** The ideal isosteric diagram of cascaded adsorption chillers (cACs) consists of the low-temperature stage (LS, L1-L4) and high-temperature stage (HS, H1-H4). Q represents the transferred heat by adsorbent/water working pairs.

Under given operational conditions in Table 3, the working capacity ( $\Delta W$ ) equals the difference of water uptake between adsorption and desorption obtained from predicted isotherms by universal adsorption isotherm model (UAIM) as described in Eq. S1.<sup>1</sup>

$$W = \sum_{i=1}^n \alpha_i \left\{ \frac{\left( \frac{P}{P_0} \exp\left(\frac{\varepsilon_i}{RT}\right) \right)^{\frac{RT}{m_i}}}{1 + \left( \frac{P}{P_0} \exp\left(\frac{\varepsilon_i}{RT}\right) \right)^{\frac{RT}{m_i}}} \right\} \quad (\text{Eq. S1})$$

W is the water equilibrium uptake, P and T represent the equilibrium pressure and temperature, and  $P_0$  is the saturation pressure of water, R is the ideal gas constant. Additionally,  $\alpha_i$ ,  $\varepsilon_i$ ,  $m_i$  and n are fitting parameters that are determined by the characteristic of adsorption isotherms given in Table S1.

The cascaded adsorption chillers (cACs) consist of the low-temperature stage (LS) and high-temperature stage (HS). In HS and LS, the  $\Delta W$  (unit: kg/kg) can be obtained by Eq. S2 and Eq. S3.

$$\Delta W_{HS} = \Delta W_{\max,HS} - \Delta W_{\min,HS} = W_{HS}(T_{\text{ads},HS}, P_{ev}) - W_{HS}(T_{\text{des},HS}, P_{con}) \quad (\text{Eq. S2})$$

$$\Delta W_{LS} = \Delta W_{\max,LS} - \Delta W_{\min,LS} = W_{LS}(T_{\text{ads},LS}, P_{ev}) - W_{LS}(T_{\text{des},LS}, P_{con}) \quad (\text{Eq. S3})$$

The cooling performance including coefficient of performance for cooling ( $\text{COP}_C$ ) and specific cooling effects (SCE) of the single-stage can be calculated based on basic thermodynamic cycle under given working conditions.<sup>2</sup>

$$\text{SCE}_{HS} = Q'_{ev,HS} = \Delta W_{HS} \left[ \Delta_{\text{vap}} H(T_{ev}) - C_p^{\text{wf}} (T_{con} - T_{ev}) \right] \quad (\text{Eq. S4})$$

$$\text{SCE}_{LS} = Q'_{ev,LS} = \Delta W_{LS} \left[ \Delta_{\text{vap}} H(T_{ev}) - C_p^{\text{wf}} (T_{con} - T_{ev}) \right] \quad (\text{Eq. S5})$$

$$\begin{aligned} \text{COP}_{\text{C,HS}} &= \frac{Q'_{\text{ev,HS}}}{Q'_{\text{reg,HS}}} \\ &= \frac{\Delta W_{\text{HS}} [\Delta_{\text{vap}} H(T_{\text{ev}}) - C_p^{\text{wf}} (T_{\text{con}} - T_{\text{ev}})]}{C_p^{\text{ad}} (T_{\text{des,HS}} - T_{\text{ads,HS}}) + C_p^{\text{wf}} \left[ W_{\text{HS}}(T_{\text{ads,HS}}, P_{\text{ev}})(T_{\text{H2}} - T_{\text{ads,HS}}) + \int_{T_{\text{H2}}}^{T_{\text{des,HS}}} W_{\text{HS}}(T) dT \right] - \Delta W_{\text{HS}} \Delta_{\text{ads}} H_{\text{ave,HS}}} \end{aligned} \quad (\text{Eq. S6})$$

$$\begin{aligned} \text{COP}_{\text{C,LS}} &= \frac{Q'_{\text{ev,LS}}}{Q'_{\text{reg,LS}}} \\ &= \frac{\Delta W_{\text{LS}} [\Delta_{\text{vap}} H(T_{\text{ev}}) - C_p^{\text{wf}} (T_{\text{con}} - T_{\text{ev}})]}{C_p^{\text{ad}} (T_{\text{des,LS}} - T_{\text{ads,LS}}) + C_p^{\text{wf}} \left[ W_{\text{LS}}(T_{\text{ads,LS}}, P_{\text{ev}})(T_{\text{L2}} - T_{\text{ads,LS}}) + \int_{T_{\text{L2}}}^{T_{\text{des,LS}}} W_{\text{LS}}(T) dT \right] - \Delta W_{\text{LS}} \Delta_{\text{ads}} H_{\text{ave,LS}}} \end{aligned} \quad (\text{Eq. S7})$$

Here,  $Q'_{\text{ev}}$  represents the transferred heat in the evaporator by water working capacity of 1 kg adsorbents, and  $Q'_{\text{reg}}$  represents the regeneration energy required for 1 kg adsorbents. In these formulas, the specific heat capacity of the adsorbent ( $C_p^{\text{ad}}$ ) and working fluid ( $C_p^{\text{wf}}$ ) are considered to be constant, they are 1 (reasonable value for a variety of adsorbents)<sup>3</sup> and 4.2 kJ/(kg·K) (for water). Additionally, the vaporization enthalpy ( $\Delta_{\text{vap}} H$ , unit is kJ/kg) of water that is a function of temperature.

$$\Delta_{\text{vap}} H(T) = -2.51(T - 273) + 2502 \quad (\text{Eq. S8})$$

The heat of adsorption ( $\Delta_{\text{ads}} H$ ) is calculated using the predicted adsorption isotherms obtained by the universal isotherm adsorption model at varying temperatures according to the Clausius-Clapeyron equation shown in Eq. S9.

$$\Delta_{\text{ads}} H = -R \frac{\partial (\ln p)}{\partial (1/T)} \quad (\text{Eq. S9})$$

Then the average heat of adsorption ( $\Delta_{\text{ads}} H_{\text{ave}}$ ) of adsorbents can be estimated as follows:

$$\Delta_{\text{ads}} H_{\text{ave}} = \frac{\int_{W_{\text{min}}}^{W_{\text{max}}} \Delta_{\text{ads}} H dW}{W_{\text{max}} - W_{\text{min}}} \approx \frac{\int_0^{W_{\text{sat}}} \Delta_{\text{ads}} H dW}{W_{\text{sat}}} \quad (\text{Eq. S10})$$

For cACs in Figure S1, in ideal conditions, it is assumed that 1 kg adsorbents were desorbed in HS, and all the heat released from HS was used for complete regeneration of  $m$  kg adsorbents in LS. Therefore,  $m$  equals to the ratio of  $Q'_{\text{reg,HS}}$  and  $Q'_{\text{reg,LS}}$ .

$$\begin{aligned} m &= \frac{Q'_{\text{reg,HS}}}{Q'_{\text{reg,LS}}} \\ &= \frac{\int_{T_{\text{ads,HS}}}^{T_{\text{des,HS}}} C_p^{\text{ad}}(T) dT + W(T_{\text{ads,HS}}, P_{\text{ev}}) \int_{T_{\text{ads,HS}}}^{T_{\text{H2}}} C_p^{\text{wf}}(T) dT + \int_{T_{\text{H2}}}^{T_{\text{des,HS}}} W(T) C_p^{\text{wf}}(T) dT + \Delta W_{\text{HS}} \Delta_{\text{ads}} H_{\text{HS}}}{\int_{T_{\text{ads,LS}}}^{T_{\text{des,LS}}} C_p^{\text{ad}}(T) dT + W(T_{\text{ads,LS}}, P_{\text{ev}}) \int_{T_{\text{ads,LS}}}^{T_{\text{L2}}} C_p^{\text{wf}}(T) dT + \int_{T_{\text{L2}}}^{T_{\text{des,LS}}} W(T) C_p^{\text{wf}}(T) dT + \Delta W_{\text{LS}} \Delta_{\text{ads}} H_{\text{LS}}} \end{aligned} \quad (\text{Eq. S11})$$

Therefore, according to the definition of SCE and  $\text{COP}_{\text{C}}$ , the SCE in the total system ( $\text{SCE}_{\text{TS}}$ ) and  $\text{COP}_{\text{C}}$  in the total system ( $\text{COP}_{\text{C,TS}}$ ) can be calculated as follows.

$$\text{SCE}_{\text{TS}} = \frac{Q_{\text{ev,TS}}}{1+m} = \frac{Q_{\text{ev,HS}} + Q_{\text{ev,LS}}}{1+m} = \frac{Q'_{\text{ev,HS}} + mQ'_{\text{ev,LS}}}{1+m} = \frac{\text{SCE}_{\text{HS}} + m\text{SCE}_{\text{LS}}}{1+m} \quad (\text{Eq. S12})$$

$$\text{COP}_{\text{C,TS}} = \frac{Q_{\text{ev,TS}}}{Q_{\text{reg,HS}}} = \frac{Q'_{\text{ev,HS}} + mQ'_{\text{ev,LS}}}{Q'_{\text{reg,HS}}} = \frac{Q'_{\text{ev,HS}} + \frac{Q'_{\text{reg,HS}}}{Q'_{\text{reg,LS}}} \times Q'_{\text{ev,LS}}}{Q'_{\text{reg,HS}}} = \text{COP}_{\text{C,HS}} + \text{COP}_{\text{C,LS}} \quad (\text{Eq. S13})$$

Therefore, under given operational conditions, the cooling performance including  $SCE_{TS}$  and  $COP_{C,TS}$  can be obtained by combining the equations abovementioned.

### S3. Cooling performance of adsorbents/water working pairs for cACs

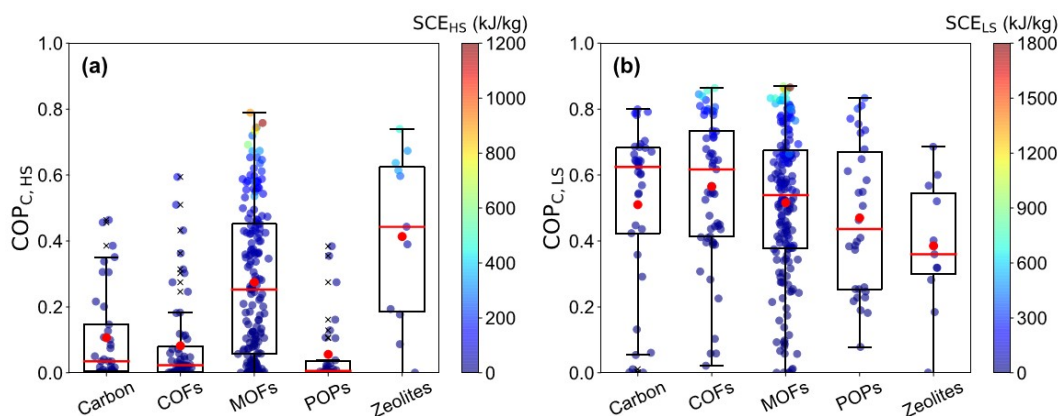

**Figure S2.** The distribution of different adsorbent species with the varying coefficient of performance for cooling ( $COP_c$ ) and specific cooling effects (SCE) in (a) high-temperature stage (HS) and (b) low-temperature stage (LS).

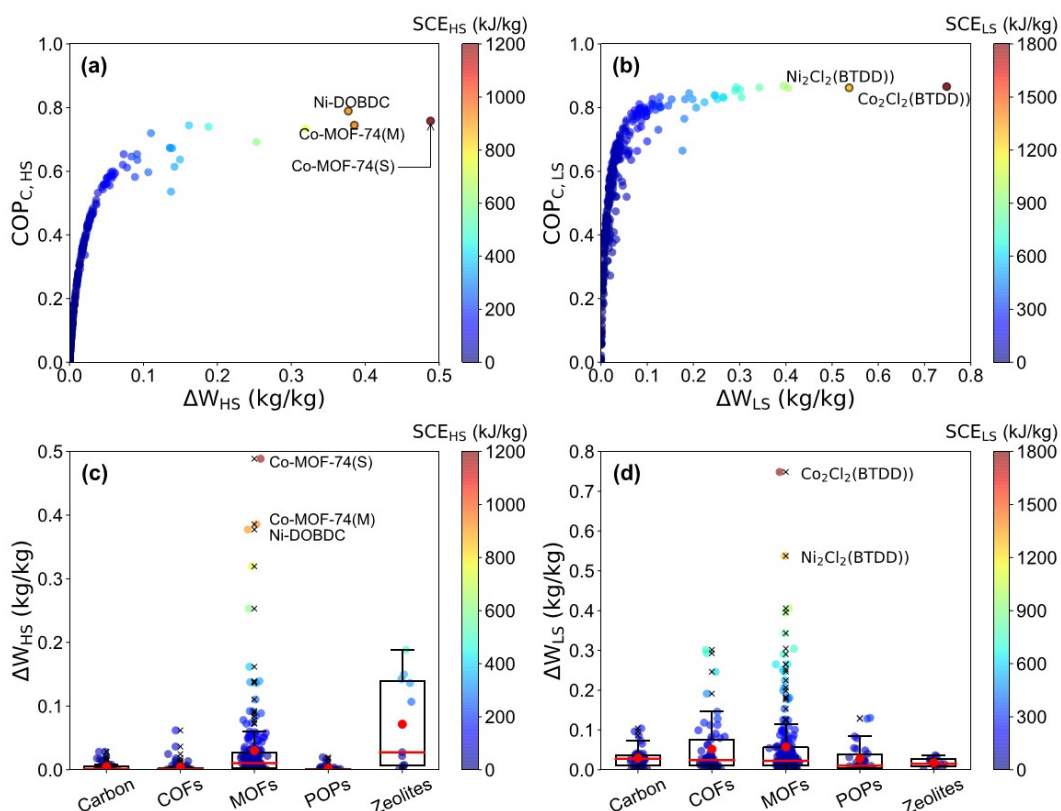

**Figure S3.** The relationship between the coefficient of performance for cooling ( $COP_c$ ) and water working capacity ( $\Delta W$ ) in (a) high-temperature stage (HS) and (b) low-temperature stage (LS). The distribution of different adsorbent species with varying  $\Delta W$  in (c) HS (d) LS. All of the data points were colored by specific cooling effects (SCE) in the single-stage.

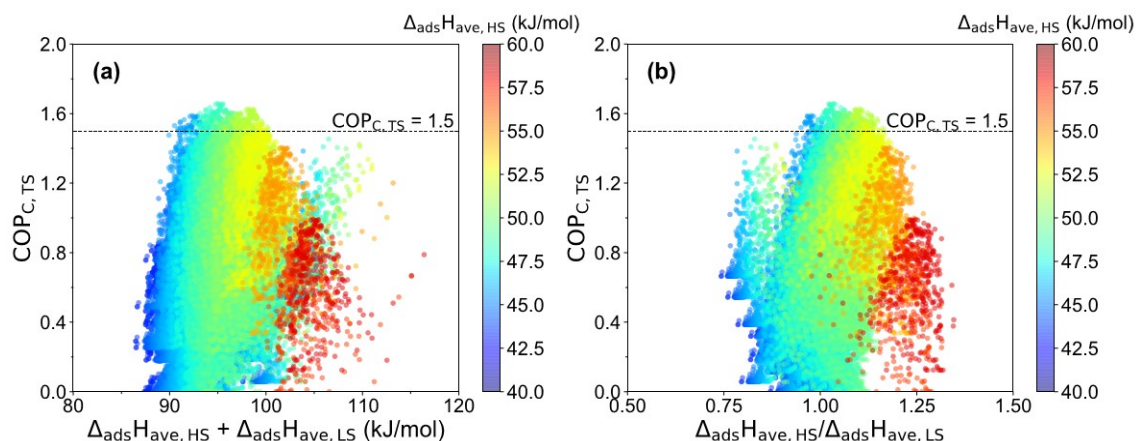

**Figure S4.** The relationship between the coefficient of performance for cooling ( $COP_c$ ) and (a) the summation of average heat of adsorption of HS and LS ( $\Delta_{ads}H_{ave,HS} + \Delta_{ads}H_{ave,LS}$ ), (b) the ratio of average heat of adsorption of HS and LS ( $\Delta_{ads}H_{ave,HS}/\Delta_{ads}H_{ave,LS}$ ). The data points were colored by  $\Delta_{ads}H_{ave,HS}$ .

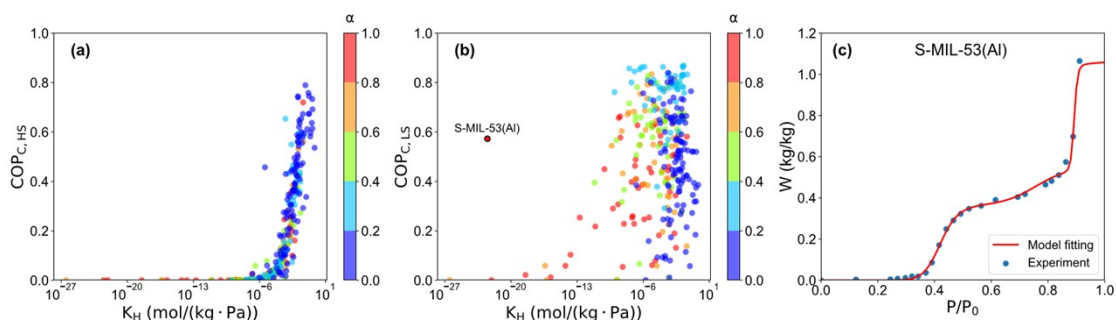

**Figure S5.** The relationship between the coefficient of performance for cooling ( $COP_c$ ) and Henry's constant ( $K_H$ ) in (a) high-temperature stage (HS) and (b) low-temperature stage (LS), and the data points were colored by step position ( $\alpha$ ) of adsorption isotherms. (c) The water adsorption isotherm of S-MIL-53(Al)<sup>4</sup> at 298 K was fitted by universal adsorption isotherm model (UAIM).

The positive relationship between  $COP_c$  and the  $K_H$  in single-stage, as well as the optimal range of  $K_H$  for adsorbents with high  $COP_c$  (i.e.,  $10^{-3} < K_{H,HS} < 10^0$  for  $COP_{c,HS} > 0.7$ , and  $10^{-7} < K_{H,LS} < 10^{-1}$  for  $COP_{c,LS} > 0.8$ ) was shown in Figure S4. Besides, the negative correlation between  $K_H$  and step position ( $\alpha$ ) was observed. Normally, the adsorption chillers (ACs) with S-MIL-53(Al)<sup>4</sup>/water as working pairs in LS showed low Henry's constant ( $K_H$ ) and larger step position ( $\alpha$ ) ( $0.8 < \alpha < 1.0$ ) of adsorption isotherm. However, it performed higher  $COP_c$  around 0.6 than other adsorbents with similar  $K_H$  and  $\alpha$ , which due to its adsorption isotherms with multiple adsorption steps (Figure S4c) that results in decent working capacity at applied working conditions.

**Table S7.** The number of adsorbents in the different range of step position ( $\alpha$ ) at 298 K.

| $\alpha$ | Number | Species |      |      |      |          |
|----------|--------|---------|------|------|------|----------|
|          |        | Carbon  | COFs | MOFs | POPs | Zeolites |
| 0.0-0.1  | 76     | 3       | 3    | 61   | —    | 9        |
| 0.1-0.2  | 34     | 1       | 4    | 26   | 2    | 1        |
| 0.2-0.3  | 27     | 5       | 4    | 18   | —    | —        |

|            |            |           |           |            |           |           |
|------------|------------|-----------|-----------|------------|-----------|-----------|
| 0.3-0.4    | 26         | 3         | 6         | 17         | —         | —         |
| 0.4-0.5    | 19         | 2         | 4         | 13         | —         | —         |
| 0.5-0.6    | 27         | 7         | 11        | 6          | 3         | —         |
| 0.6-0.7    | 24         | 6         | 9         | 6          | 3         | —         |
| 0.7-0.8    | 27         | 2         | 6         | 10         | 8         | 1         |
| 0.8-0.9    | 33         | 4         | 9         | 12         | 8         | —         |
| 0.9-1.0    | 18         | 4         | 1         | 7          | 6         | —         |
| <b>Sum</b> | <b>311</b> | <b>37</b> | <b>57</b> | <b>176</b> | <b>30</b> | <b>11</b> |

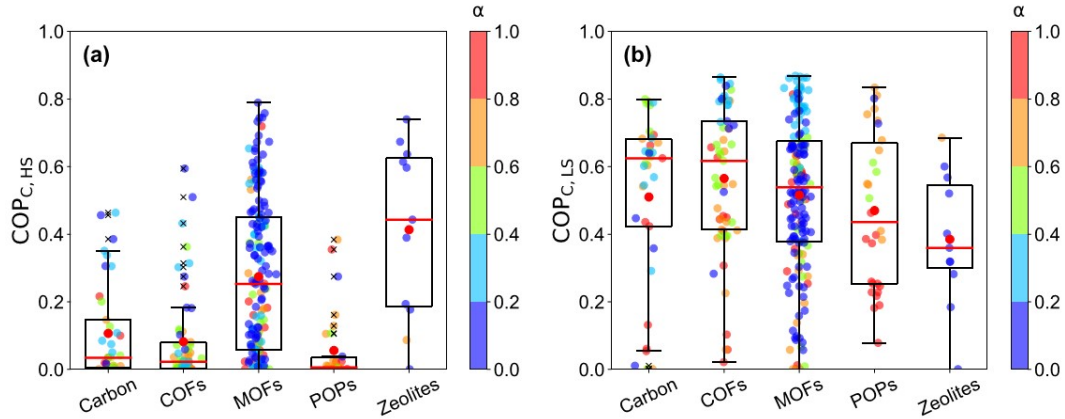

**Figure S6.** The distribution of different adsorbent species with varying coefficient of performance for cooling ( $COP_c$ ) in (a) high-temperature stage (HS) and (b) low-temperature stage (LS), and data points were colored by step position ( $\alpha$ ) of adsorption isotherms.

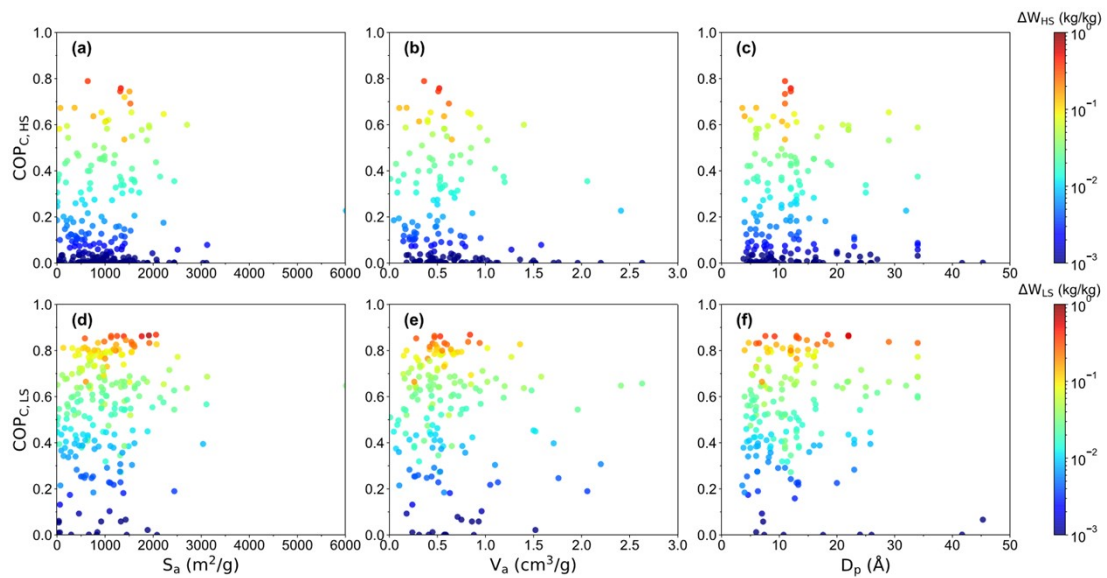

**Figure S7.** The relationship between coefficient of performance for cooling ( $COP_c$ ) and structural characteristics ( $S_a$  is accessible surface area,  $V_a$  is available pore volume,  $D_p$  is pore size), which is colored by water working capacity ( $\Delta W$ ) for (a-c) high-temperature stage (HS) and (d-f) low-temperature stage (LS).



**Table S8.** Top 10 adsorbents with the highest COP<sub>C,HS</sub> in HS

| No. | Adsorbents                        | Species | Component     |        | S <sub>a</sub><br>(m <sup>2</sup> /g) | V <sub>a</sub><br>(cm <sup>3</sup> /g) | D <sub>p</sub><br>(Å) | ΔW <sub>HS</sub><br>(kg/kg) | Δ <sub>ads</sub> H <sub>ave</sub><br>(kJ/mol) | α       | K <sub>H</sub><br>(mol/(kg·Pa)) | COP <sub>C,HS</sub> | SCE <sub>HS</sub><br>(kJ/kg) | Water stability                                                                                                   |
|-----|-----------------------------------|---------|---------------|--------|---------------------------------------|----------------------------------------|-----------------------|-----------------------------|-----------------------------------------------|---------|---------------------------------|---------------------|------------------------------|-------------------------------------------------------------------------------------------------------------------|
|     |                                   |         | Metal         | Linker |                                       |                                        |                       |                             |                                               |         |                                 |                     |                              |                                                                                                                   |
| 1   | Ni-DOBDC <sup>5</sup>             | MOF     | Ni            | DOBDC  | 639                                   | 0.362                                  | 11 <sup>c1</sup>      | 0.38                        | 48.30                                         | 0.0-0.1 | 7.41×10 <sup>-2</sup>           | 0.789               | 907                          | No loss in ΔW over 50 ads. cycles <sup>6</sup>                                                                    |
| 2   | Co-MOF-74(S) <sup>7</sup>         | MOF     | Co            | DOBDC  | 1327                                  | 0.52                                   | 12 <sup>c1</sup>      | 0.49                        | 51.48                                         | 0.0-0.1 | 1.53×10 <sup>-1</sup>           | 0.758               | 1175                         | 37% loss in W <sub>max</sub> over 1-2 ads. cycles, no loss in W <sub>max</sub> over 2-5 ads. cycles <sup>8</sup>  |
| 3   | Co-MOF-74(M) <sup>7</sup>         | MOF     | Co            | DOBDC  | 1314                                  | 0.51                                   | 12 <sup>c1</sup>      | 0.39                        | 51.56                                         | 0.0-0.1 | 1.80×10 <sup>-1</sup>           | 0.745               | 927                          | 37% loss in W <sub>max</sub> over 1-2 ads. cycles, no loss in W <sub>max</sub> over 2-5 ads. cycles <sup>8</sup>  |
| 4   | CuBTC <sup>9</sup>                | MOF     | Cu            | BTC    | 1507                                  | n.d.                                   | n.d.                  | 0.16                        | 47.74                                         | 0.0-0.1 | 1.19×10 <sup>-2</sup>           | 0.744               | 389                          | 42% loss in W <sub>max</sub> after 10 ads. cycles <sup>10</sup>                                                   |
| 5   | Zeolite Na-A <sup>11</sup>        | Zeolite | Na, Al, Si, O |        | n.d.                                  | n.d.                                   | n.d.                  | 0.19                        | 49.20                                         | 0.0-0.1 | 1.22×10 <sup>-2</sup>           | 0.739               | 453                          | Water stable                                                                                                      |
| 6   | CPO-27-Ni <sup>12</sup>           | MOF     | Ni            | DOBDC  | n.d.                                  | n.d.                                   | 11 <sup>c1</sup>      | 0.32                        | 50.11                                         | 0.0-0.1 | 3.95×10 <sup>-1</sup>           | 0.733               | 768                          | No loss in ΔW over 50 ads. cycles <sup>6</sup>                                                                    |
| 7   | HKUST-1-F <sup>13</sup>           | MOF     | Cu            | BTC-F  | 1404                                  | n.d.                                   | n.d.                  | 0.11                        | 45.65                                         | 0.9-1.0 | 4.20×10 <sup>-2</sup>           | 0.719               | 265                          | n.d.                                                                                                              |
| 8   | Mg-MOF-74 <sup>14</sup>           | MOF     | Mg            | DOBDC  | 1525                                  | 0.62                                   | 11 <sup>c1</sup>      | 0.25                        | 50.25                                         | 0.0-0.1 | 4.15×10 <sup>-1</sup>           | 0.691               | 608                          | 49% loss in W <sub>max</sub> over 1-2 ads. cycles, no loss in W <sub>max</sub> over 2-5 ads. cycles <sup>8</sup>  |
| 9   | Zn-MOF-74 (cycle 1) <sup>15</sup> | MOF     | Zn            | DOBDC  | n.d.                                  | n.d.                                   | n.d.                  | 0.14                        | 49.74                                         | 0.0-0.1 | 1.72×10 <sup>-1</sup>           | 0.673               | 327                          | 50% loss in W <sub>max</sub> over 1-2 ads. cycles, no loss in W <sub>max</sub> over 2-5 ads. cycles <sup>15</sup> |
| 10  | Na-ZSM-5 <sup>16</sup>            | Zeolite | Na, Al, Si, O |        | 366                                   | 0.18                                   | 6 <sup>c1</sup>       | 0.13                        | 50.61                                         | 0.0-0.1 | 1.61×10 <sup>-1</sup>           | 0.673               | 325                          | Water stable                                                                                                      |

**Table S9.** Top 10 adsorbents with the highest COP<sub>C,LS</sub> in LS

| No. | Adsorbents                                           | Species | Component                          |        | S <sub>a</sub><br>(m <sup>2</sup> /g) | V <sub>a</sub><br>(cm <sup>3</sup> /g) | D <sub>p</sub><br>(Å) | ΔW <sub>LS</sub><br>(kg/kg) | Δ <sub>ads</sub> H <sub>ave</sub><br>(kJ/mol) | α       | K <sub>H</sub><br>(mol/(kg·Pa)) | COP <sub>C,LS</sub> | SCE <sub>LS</sub><br>(kJ/kg) | Water stability                                      |
|-----|------------------------------------------------------|---------|------------------------------------|--------|---------------------------------------|----------------------------------------|-----------------------|-----------------------------|-----------------------------------------------|---------|---------------------------------|---------------------|------------------------------|------------------------------------------------------|
|     |                                                      |         | Metal                              | Linker |                                       |                                        |                       |                             |                                               |         |                                 |                     |                              |                                                      |
| 1   | Zr-MOF-808 <sup>8</sup>                              | MOF     | Zr                                 | BTC    | 2060                                  | 0.84                                   | 18.4 <sup>c1</sup>    | 0.40                        | 46.68                                         | 0.3-0.4 | 1.97×10 <sup>-2</sup>           | 0.868               | 951                          | Unstable/strong water ads. <sup>8</sup>              |
| 2   | Co <sub>2</sub> Cl <sub>2</sub> (BTDD) <sup>17</sup> | MOF     | Co                                 | BTDD   | 1912                                  | n.d.                                   | 22 <sup>c2</sup>      | 0.75                        | 47.25                                         | 0.2-0.3 | 1.54×10 <sup>-2</sup>           | 0.865               | 1799                         | 6.3% loss in ΔW over 30 ads. cycles <sup>17</sup>    |
| 3   | AB-COF <sup>18</sup>                                 | COF     | 1,3,5-triformyl benzene, hydrazine |        | 1125                                  | 0.47                                   | 13 <sup>c1</sup>      | 0.29                        | 46.46                                         | 0.2-0.3 | 1.38×10 <sup>-6</sup>           | 0.864               | 704                          | Fully reversible ΔW over 4 ads. cycles <sup>18</sup> |
| 4   | CAU-23 <sup>19</sup>                                 | MOF     | Al                                 | TDC    | 1250                                  | n.d.                                   | 7.6 <sup>c2</sup>     | 0.34                        | 46.80                                         | 0.2-0.3 | 1.24×10 <sup>-4</sup>           | 0.863               | 825                          | No loss in ΔW over 5000 ads. cycles <sup>19</sup>    |

|    |                                                      |     |     |          |      |      |                    |      |       |         |                       |       |      |                                                                |
|----|------------------------------------------------------|-----|-----|----------|------|------|--------------------|------|-------|---------|-----------------------|-------|------|----------------------------------------------------------------|
| 5  | Ni <sub>2</sub> Cl <sub>2</sub> (BTDD) <sup>17</sup> | MOF | Ni  | BTDD     | 1762 | n.d. | 22 <sup>c2</sup>   | 0.54 | 47.18 | 0.3-0.4 | 1.59×10 <sup>-2</sup> | 0.862 | 1292 | Little loss in S <sub>BET</sub> after water ads. <sup>17</sup> |
| 6  | Zr-MOF-841 <sup>8</sup>                              | MOF | Zr  | MTB      | 1390 | 0.53 | 9.2 <sup>c1</sup>  | 0.41 | 47.03 | 0.2-0.3 | 6.55×10 <sup>-7</sup> | 0.862 | 975  | 7% loss in W <sub>max</sub> after 5 ads. cycles <sup>8</sup>   |
| 7  | Mg-CUK-1 <sup>20</sup>                               | MOF | Mg, | PDC      | 580  | 0.28 | 13.4 <sup>c2</sup> | 0.29 | 47.04 | 0.2-0.3 | 4.19×10 <sup>-7</sup> | 0.853 | 698  | No loss in ΔW over 50 ads. cycles <sup>20</sup>                |
| 8  | TpPa-1 (Karak) <sup>21</sup>                         | COF |     | Tp, Pa-1 | 1432 | n.d. | 14.8 <sup>c1</sup> | 0.19 | 45.87 | 0.2-0.3 | 1.21×10 <sup>-7</sup> | 0.845 | 459  | No loss in ΔW over 4 ads. cycles <sup>21</sup>                 |
| 9  | TpPa-1 (Biswal) <sup>22</sup>                        | COF |     | Tp, Pa-1 | 984  | n.d. | 18 <sup>c1</sup>   | 0.25 | 46.89 | 0.1-0.2 | 4.15×10 <sup>-4</sup> | 0.839 | 592  | No loss in ΔW over 10 ads. cycles <sup>22</sup>                |
| 10 | MIL-100(Fe) <sup>23</sup>                            | MOF | Fe  | BTC      | 1549 | 0.82 | 29 <sup>c2</sup>   | 0.25 | 46.81 | 0.3-0.4 | 5.68×10 <sup>-4</sup> | 0.837 | 593  | No loss in ΔW over 10 ads. cycles <sup>24</sup>                |

n.d. represents "no data".

For D<sub>p</sub>: <sup>c1</sup> average pore diameter, <sup>c2</sup> largest cavity diameter, <sup>c3</sup> dominant pore size obtained according to pore size distribution.

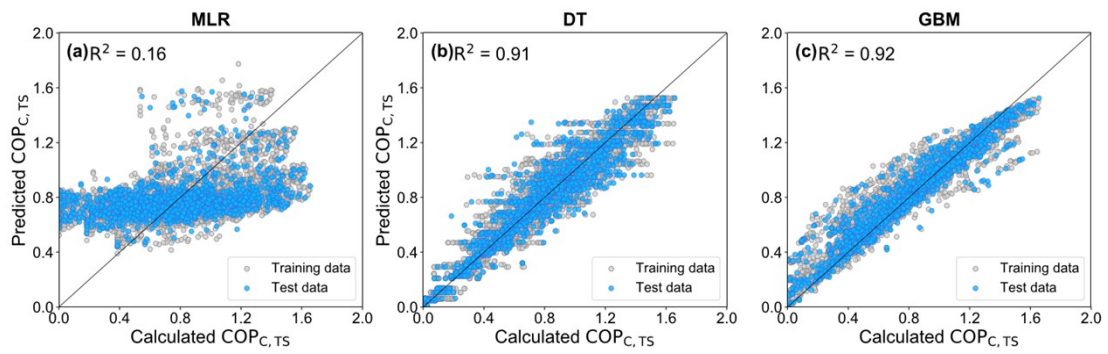

**Figure S8.** The coefficient of performance of the total system ( $COP_{C,TS}$ ) is predicted by varying machine learning models (a) multiple linear regression (MLR), (b) decision tree (DT) and (c) gradient boosting machine (GBM)

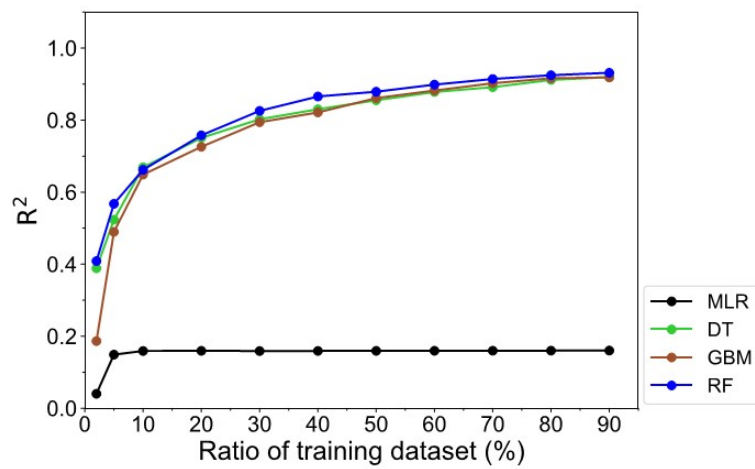

**Figure S9.** The  $R^2$  for predicting  $COP_C$  using four ML models (MLR, DT, GBM and RF) under the various ratios of the training dataset

## References

1. K. C. Ng, M. Burhan, M. W. Shahzad and A. B. Ismail, *Sci. Rep.*, 2017, **7**, 10634.
2. Z. Liu, W. Li, P. Z. Moghadam and S. Li, *Sustainable Energy & Fuels*, 2021, **5**, 1075-1084.
3. M. F. d. Lange, K. J. F. M. Verouden, T. J. H. Vlugt, J. Gascon and F. Kapteijn, *Chem. Rev.*, 2015, **115**, 12205-12250.
4. M. G. Goesten, J. Juan-Alcañiz, E. V. Ramos-Fernandez, K. B. Sai Sankar Gupta, E. Stavitski, H. van Bekkum, J. Gascon and F. Kapteijn, *J. Catal.*, 2011, **281**, 177-187.
5. J. Liu, Y. Wang, A. I. Benin, P. Jakubczak, R. R. Willis and M. D. LeVan, *Langmuir*, 2010, **26**, 14301-14307.
6. B. Shi, A.-D. Raya, S. Mahmoud, A. Elsayed and E. Elsayed, *Appl. Therm. Eng.*, 2016, **106**, 325-333.
7. H.-Y. Cho, D.-A. Yang, J. Kim, S.-Y. Jeong and W.-S. Ahn, *Catal. Today*, 2012, **185**, 35-40.
8. H. Furukawa, F. Gandara, Y. B. Zhang, J. Jiang, W. L. Queen, M. R. Hudson and O. M. Yaghi, *J. Am. Chem. Soc.*, 2014, **136**, 4369-4381.
9. J. Kim, S.-H. Kim, S.-T. Yang and W.-S. Ahn, *Microporous Mesoporous Mater.*, 2012, **161**, 48-55.
10. M. Wöllner, N. Klein and S. Kaskel, *Microporous Mesoporous Mater.*, 2019, **278**, 206-211.
11. S.-i. Furukawa, K. Goda, Y. Zhang and T. Nitta, *J. Chem. Eng. Jpn.*, 2004, **37**, 67-74.
12. A. Das, P. D. Southon, M. Zhao, C. J. Kepert, A. T. Harris and D. M. D'Alessandro, *Dalton Trans*, 2012, **41**, 11739-11744.
13. N. Ko, J. Hong, L. You, H. J. Park, J. K. Yang and J. Kim, *Bull. Korean Chem. Soc.*, 2015, **36**, 327-332.
14. D.-A. Yang, H.-Y. Cho, J. Kim, S.-T. Yang and W.-S. Ahn, *Energy Environ. Sci.*, 2012, **5**, 6465-6473.
15. Y. Li, X. Wang, D. Xu, J. D. Chung, M. Kaviani and B. Huang, *J. Phys. Chem. C*, 2015, **119**, 13021-13031.
16. L. N. Ho, Y. Schuurman, D. Farrusseng and B. Coasne, *J. Phys. Chem. C*, 2015, **119**, 21547-21554.
17. A. J. Rieth, S. Yang, E. N. Wang and M. Dinca, *ACS Cent. Sci.*, 2017, **3**, 668-672.
18. L. Stegbauer, M. W. Hahn, A. Jentys, G. Savasci, C. Ochsenfeld, J. A. Lercher and B. V. Lotsch, *Chem. Mater.*, 2015, **27**, 7874-7881.
19. D. Lenzen, J. Zhao, S. J. Ernst, M. Wahiduzzaman, A. Ken Inge, D. Frohlich, H. Xu, H. J. Bart, C. Janiak, S. Henninger, G. Maurin, X. Zou and N. Stock, *Nat. Commun.*, 2019, **10**, 3025.
20. J. S. Lee, J. W. Yoon, P. G. M. Mileo, K. H. Cho, J. Park, K. Kim, H. Kim, M. F. de Lange, F. Kapteijn, G. Maurin, S. M. Humphrey and J. S. Chang, *ACS Appl. Mater. Interfaces*, 2019, **11**, 25778-25789.
21. S. Karak, S. Kandambeth, B. P. Biswal, H. S. Sasmal, S. Kumar, P. Pachfule and R. Banerjee, *J. Am. Chem. Soc.*, 2017, **139**, 1856-1862.
22. B. P. Biswal, S. Kandambeth, S. Chandra, D. B. Shinde, S. Bera, S. Karak, B. Garai, U. K. Kharul and R. Banerjee, *J. Mater. Chem. A*, 2015, **3**, 23664-23669.
23. P. Küsgens, M. Rose, I. Senkovska, H. Fröde, A. Henschel, S. Siegle and S. Kaskel, *Microporous Mesoporous Mater.*, 2009, **120**, 325-330.
24. Y. K. Seo, J. W. Yoon, J. S. Lee, Y. K. Hwang, C. H. Jun, J. S. Chang, S. Wuttke, P. Bazin, A. Vimont and M. Daturi, *Adv. Mater.*, 2012, **24**, 806-810.
