# Supplementary material for: Large-scale cascade cooling performance evaluation of adsorbent/water working pairs by integrated mathematical modelling and machine learning
Source: Royal Society of Chemistry journal article supplement (doi:10.1039/d1ta11023c), 2022-01-01
Supplement: d1ta11023c2.xlsx [file d1ta11023c2.xlsx]

## Sheet: Table S2
Table S2. Source of literature corresponding to 311 adsorbents studied in this work.
Literature number	Title	DOI	First author	Year
[1]	Liquid Phase Heteroepitaxial Growth of Moisture-Tolerant MOF-5 Isotype Thin Films and Assessment of the Sorption Properties by Quartz Crystal Microbalance	DOI: 10.1002/adfm.201302854	Suttipong Wannapaiboon	2013
[2]	Design of Hydrophilic Metal Organic Framework Water Adsorbents for Heat Reallocation	DOI: 10.1002/adma.201502418	Amandine Cadiau	2015
[3]	Enhancement of CO 2 Adsorption and CO 2 /N 2 Selectivity on ZIF-8 via Postsynthetic Modification	DOI: 10.1002/Aic.13970	Zhijuan Zhang	2013
[4]	Dynamic Structural Behavior and Anion-Responsive Tunable Luminescence of a Flexible Cationic Metal-Organic Framework	DOI: 10.1002/anie.201206724	Biplab Manna	2013
[5]	A Water Stable Metal-Organic Framework with Optimal Features for CO 2 Capture	DOI: 10.1002/anie.201302682	Qingyuan Yang	2013
[6]	Highly Hydrophobic Isoreticular Porous Metal-Organic Frameworks for the Capture of Harmful Volatile Organic Compounds	DOI: 10.1002/anie.201303484	Natalia M. Padial	2013
[7]	Ultra-Tuning of the Rare-Earth fcu-MOF Aperture Size for Selective Molecular Exclusion of Branched Paraffins	DOI: 10.1002/anie.201506345	Ayalew H. Assen	2015
[8]	A Robust Infinite Zirconium Phenolate Building Unit to Enhance the Chemical Stability of Zr MOFs	DOI: 10.1002/anie.201507058	Georges Mouchaham	2015
[9]	A Zeolite-Like Zinc Phosphonocarboxylate Framework and Its Transformation into Two- and Three-Dimensional Structures	DOI: 10.1002/asia.200700209	Zhenxia Chen	2007
[10]	Two Zn II Metal-Organic Frameworks with Coordinatively Unsaturated Metal Sites: Structures, Adsorption, and Catalysis	DOI: 10.1002/asia.201200601	Xiao-Ming Lin	2012
[11]	Chemical Property Change in a Metal-Organic Framework by Fluoro Functionality	DOI: 10.1002/bkcs.10087	Nakeun Ko	2015
[12]	Microporous Metal–Organic Framework Constructed from Heptanuclear Zinc Carboxylate Secondary Building Units	DOI: 10.1002/chem.200500963	Qian-Rong Fang	2006
[13]	A Porous Coordination Polymer with Accessible Metal Sites and its Complementary Coordination Action	DOI: 10.1002/chem.200802730	Hirotoshi Sakamoto	2009
[14]	Flexible Metal-Organic Framework with Hydrophobic Pores	DOI: 10.1002/chem.201103078	Lin-Hua Xie	2011
[15]	A Robust Porous Metal-Organic Framework with a New Topology That Demonstrates Pronounced Porosity and High-Efficiency Sorption/Selectivity Properties of Small Molecules	DOI: 10.1002/chem.201103687	Huanhuan Li	2012
[16]	Decametallic Co II -Cluster-Based Microporous Magnetic Framework with a Semirigid Multicoordinating Ligand	DOI: 10.1002/chem.201204458	Jumei Tian	2013
[17]	A New Synthetic Route to Microporous Silica with Well-Defined Pores by Replication of a Metal-Organic Framework	DOI: 10.1002/chem.201501599	Atsushi Kondo	2015
[18]	Topological Diversity, Adsorption and Fluorescence Properties of MOFs Based on a Tetracarboxylate Ligand	DOI: 10.1002/ejic.201000415	Ronny Grünker	2010
[19]	Two 3D Supramolecular Isomeric Mixed-Ligand Co II Frameworks - Guest-Induced Structural Variation, Magnetism, and Selective Gas Adsorption	DOI: 10.1002/ejic.201200851	Dan Liu	2012
[20]	On the Physical Adsorption of Vapors by Microporous Carbons	DOI: 10.1006/jcis.1995.1018	R. H. Bradley	1995
[21]	Comparison of Gaseous Molecular Adsorption Properties of Microporous Manganese Oxides and Crystalline Aluminosilicates	DOI: 10.1006/jcis.2000.7399	Z. M. Wang	2001
[22]	Activated Carbon Oxygen Content Influence on Water and Surfactant Adsorption	DOI: 10.1006/jcis.2001.8052	Phillip Pendleton	2002
[23]	Adsorption of toluene and toluene–water vapor mixture on almond shell based activated carbons	DOI: 10.1007/s10450-013-9540-5	Alicia Martínez de Yuso	2013
[24]	Synthesis, structures and properties of three new compounds based on multidentate ligand containing triazole and pyrimidine	DOI: 10.1007/s40242-015-5051-0	Lei Lü	2015
[25]	Adsorption of water vapor by non-porous carbons	DOI: 10.1016/0008-6223(92)90080-g	P. J. M. Carrott	1992
[26]	Evaluation of confinement effects in zeolites under Henry's adsorption regime	DOI: 10.1016/j.apsusc.2009.12.067	Marc Pera-Titus	2010
[27]	CO2 adsorption and catalytic application of Co-MOF-74 synthesized by microwave heating	DOI: 10.1016/j.cattod.2011.08.019	Hye-Young Cho	2012
[28]	Adsorption/catalytic properties of MIL-125 and NH2-MIL-125	DOI: 10.1016/j.cattod.2012.08.014	Se-Na Kim	2013
[29]	Adsorption characteristics of nanoporous carbon–silica composites synthesized from graphite oxide by a mechanochemical intercalation method	DOI: 10.1016/j.jcis.2007.04.016	Y. H. Chu	2007
[30]	Adsorption of water on three-dimensional pillared-layer metal organic frameworks	DOI: 10.1016/j.jcis.2007.05.090	Atsushi Kondo	2007
[31]	Simulations of model metal-organic frameworks for the separation of carbon dioxide	DOI: 10.1016/j.egypro.2011.01.090	Brad A. Wells	2011
[32]	Water adsorption–desorption property of stable porous supramolecular assembly composed of discrete tetranuclear iron(III) complex using π⋯π interactions	DOI: 10.1016/j.ica.2012.02.002		2012
[33]	Grafting of hydrophilic ethylene glycols or ethylenediamine on coordinatively unsaturated metal sites in MIL-100(Cr) for improved water adsorption characteristics	DOI: 10.1016/j.ica.2013.07.024	Martin Wickenheisser	2013
[34]	A 3D POM–MOF composite based on Ni(ΙΙ) ion and 2,2′-bipyridyl-3,3′-dicarboxylic acid: Crystal structure and proton conductivity	DOI: 10.1016/j.jssc.2013.03.041	Meilin Wei	2013
[35]	Reversible flexible structural changes in multidimensional MOFs by guest molecules (I2, NH3) and thermal stimulation	DOI: 10.1016/j.jssc.2015.02.014	Yang Chen	2015
[36]	Characterisation of metal organic frameworks for adsorption cooling	DOI: 10.1016/j.ijheatmasstransfer.2012.07.068	Ahmed Rezk	2012
[37]	Design, structure and properties of a novel 3D metal-organic framework constructed from N-donor ligand supporting Cd(II)-carboxylate layer	DOI: 10.1016/j.inoche.2006.02.029	Ming Xue	2006
[38]	Adsorption–desorption of water vapour on chars prepared from commercial wood charcoals, in relation to their chemical composition, surface chemistry and pore structure	DOI: 10.1016/j.jaap.2010.03.005	J. Pastor-Villegas	2010
[39]	Sulfation of metal–organic frameworks: Opportunities for acid catalysis and proton conductivity	DOI: 10.1016/j.jcat.2011.04.015	Maarten G	2011
[40]	Characterization of metal-organic frameworks by water adsorption	DOI: 10.1016/j.micromeso.2008.11.020	Pia Küsgens	2009
[41]	Effect of functional groups in MIL-101 on water sorption behavior	DOI: 10.1016/j.micromeso.2012.01.015	George Akiyama	2012
[42]	Bench-scale preparation of Cu3(BTC)2 by ethanol reflux: Synthesis optimization and adsorption/catalytic applications	DOI: 10.1016/j.micromeso.2012.05.021	Jun Kim	2012
[43]	Thermogravimetric and adsorption studies of oxidized active carbons by using different probe molecules	DOI: 10.1016/s0040-6031(99)00375-5	Zuojiang Li	2000
[44]	Binary mixture adsorption of water and ethanol on silicalite	DOI: 10.1016/S0167-2991(02)80329-9	Y. Oumi	2002
[45]	Single-component gas phase adsorption and desorption studies using a tapered element oscillating microbalance	DOI: 10.1016/S1387-1811(02)00428-6	Arjan Giaya	2002
[46]	Defect Control To Enhance Proton Conductivity in a Metal–Organic Framework	DOI: 10.1021/acs.chemmater.5b00665	Jared M. Taylor	2015
[47]	Hydrostable and Nitryl/Methyl-Functionalized Metal–Organic Framework for Drug Delivery and Highly Selective CO2Adsorption	DOI: 10.1021/acs.inorgchem.5b00335	De-Yun Ma	2015
[48]	H2O Adsorption/Desorption in MOF-74:Ab InitioMolecular Dynamics and Experiments	DOI: 10.1021/acs.jpcc.5b02069	Yunsong Li	2015
[49]	Solubility of Gases in Water Confined in Nanoporous Materials: ZSM-5, MCM-41, and MIL-100	DOI: 10.1021/acs.jpcc.5b06660	Linh Ngoc Ho	2015
[50]	Three-Dimensional Robust Porous Coordination Polymer with Schiff Base Site on the Pore Wall: Synthesis, Single-Crystal-to-Single-Crystal Reversibility, and Selective CO2Adsorption	DOI: 10.1021/Cg2004672	Rajdip Dey	2011
[51]	Variable Water Adsorption in Amino Acid Derivative Based Homochiral Metal Organic Frameworks	DOI: 10.1021/Cg3008443	Tanay Kundu	2012
[52]	A CdSO4-Type 3D Metal–Organic Framework Showing Coordination Dynamics on Cu2+Axial Sites: Vapochromic Response and Guest Sorption Selectivity	DOI: 10.1021/Cg3017563	Guo-Bi Li	2013
[53]	A Series of Three-Dimensional Lanthanide Coordination Compounds with the Rutile Topology	DOI: 10.1021/Cg800204q	Xiaojun Zhao	2009
[54]	Immobilization of Alkali Metal Ions in a 3D Lanthanide-Organic Framework: Selective Sorption and H2Storage Characteristics	DOI: 10.1021/Cm9014749	Sudip Mohapatra	2009
[55]	Investigation of Porous Ni-Based Metal–Organic Frameworks Containing Paddle-Wheel Type Inorganic Building Units via High-Throughput Methods	DOI: 10.1021/Ic200381f	Palanikumar Maniam	2011
[56]	A Vanadium (VO2+) Metal–Organic Framework: Selective Vapor Adsorption, Magnetic Properties, and Use as a Precursor for a Polyoxovanadate	DOI: 10.1021/Ic200463k	Prakash Kanoo	2011
[57]	Flexible and Hydrophobic Zn-Based Metal–Organic Framework	DOI: 10.1021/ic200937u	Ines Maria Hauptvogel	2011
[58]	Bistable Dynamic Coordination Polymer Showing Reversible Structural and Functional Transformations	DOI: 10.1021/Ic301481p	Sanjog S	2012
[59]	Gas Storage in a Partially Fluorinated Highly Stable Three-Dimensional Porous Metal–Organic Framework	DOI: 10.1021/ic302645rb	Atanu Santra	2013
[60]	Third-Generation Breathing Metal–Organic Framework with Selective, Stepwise, Reversible, and Hysteretic Adsorption Properties	DOI: 10.1021/Ic402095u	Suresh Sanda	2013
[61]	Stoichiometry-Controlled Two Flexible Interpenetrated Frameworks: Higher CO2Uptake in a Nanoscale Counterpart Supported by Accelerated Adsorption Kinetics	DOI: 10.1021/Ic500234r	Nivedita Sikdar	2014
[62]	Conformation-Controlled Sorption Properties and Breathing of the Aliphatic Al-MOF [Al(OH)(CDC)]	DOI: 10.1021/Ic500288w	Felicitas Niekiel	2014
[63]	Effect of Water Adsorption on Retention of Structure and Surface Area of Metal–Organic Frameworks	DOI: 10.1021/Ie202325p	Paul M. Schoenecker	2012
[64]	Zn(tbip) (H2tbip= 5-tert-Butyl Isophthalic Acid): A Highly Stable Guest-Free Microporous Metal Organic Framework with Unique Gas Separation Capability	DOI: 10.1021/Ja057667b	Long Pan	2006
[65]	A Porous Framework Polymer Based on a Zinc(II) 4,4‘-Bipyridine-2,6,2‘,6‘-tetracarboxylate: Synthesis, Structure, and “Zeolite-Like” Behaviors	DOI: 10.1021/Ja060946u	Xiang Lin	2006
[66]	Reversible Water-Induced Magnetic and Structural Conversion of a Flexible Microporous Ni(II)Fe(III) Ferromagnet	DOI: 10.1021/Ja069166b	Nobuhiro Yanai	2007
[67]	Explanation of the Adsorption of Polar Vapors in the Highly Flexible Metal Organic Framework MIL-53(Cr)	DOI: 10.1021/ja1023282	Sandrine Bourrelly	2010
[68]	A Sodalite-Type Porous Metal−Organic Framework with Polyoxometalate Templates: Adsorption and Decomposition of Dimethyl Methylphosphonate	DOI: 10.1021/Ja109659k	Feng-Ji Ma	2011
[69]	Super Flexibility of a 2D Cu-Based Porous Coordination Framework on Gas Adsorption in Comparison with a 3D Framework of Identical Composition: Framework Dimensionality-Dependent Gas Adsorptivities	DOI: 10.1021/Ja201170c	Atsushi Kondo	2011
[70]	Hydroxyl Group Recognition by Hydrogen-Bonding Donor and Acceptor Sites Embedded in a Layered Metal–Organic Framework	DOI: 10.1021/Ja203291n	Masaaki Sadakiyo	2011
[71]	Capture of Nerve Agents and Mustard Gas Analogues by Hydrophobic Robust MOF-5 Type Metal–Organic Frameworks	DOI: 10.1021/Ja2042113	Carmen Montoro	2011
[72]	Helical Water Chain Mediated Proton Conductivity in Homochiral Metal–Organic Frameworks with Unprecedented Zeoliticunh-Topology	DOI: 10.1021/Ja2078637	Subash Chandra Sahoo	2011
[73]	Enhancing Water Stability of Metal–Organic Frameworks via Phosphonate Monoester Linkers	DOI: 10.1021/Ja306812r	Jared M. Taylor	2012
[74]	Water Adsorption in Porous Metal–Organic Frameworks and Related Materials	DOI: 10.1021/Ja500330a	Hiroyasu Furukawa	2014
[75]	Adsorption Isotherms of Water, Propan-2-ol, and Methylbenzene Vapors on Grade 03 Silica Gel, Sorbonorit 4 Activated Carbon, and HiSiv 3000 Zeolite	DOI: 10.1021/je400517c	Józef Nastaj	2013
[76]	Uncommon Adsorption Isotherm of Methanol on a Hydrophobic Y-zeolite	DOI: 10.1021/Jp0103530	Istvan Halasz	2001
[77]	Molecular Understanding for the Adsorption of Water and Alcohols in Hydrophilic and Hydrophobic Zeolitic Metal−Organic Frameworks	DOI: 10.1021/Jp1033273	Anjaiah Nalaparaju	2010
[78]	Molecular Simulation of Water/Alcohol Mixtures’ Adsorption and Diffusion in Zeolite 4A Membranes	DOI: 10.1021/Jp805923k	Jian Yang Wu	2009
[79]	Probing the Mechanism of Water Adsorption in Carbon Micropores with Multitemperature Isotherms and Water Preadsorption Experiments	DOI: 10.1021/la061140a	S. W. Rutherford	2006
[80]	CO2/H2O Adsorption Equilibrium and Rates on Metal−Organic Frameworks: HKUST-1 and Ni/DOBDC	DOI: 10.1021/La102359q	Jian Liu	2010
[81]	Electron Microscopic Study on Aerosol-Assisted Synthesis of Aluminum Organophosphonates Using Flexible Colloidal PS-b-PEO Templates	DOI: 10.1021/La302695q	Tatsuo Kimura	2012
[82]	Adjusting the Stability of Metal–Organic Frameworks under Humid Conditions by Ligand Functionalization	DOI: 10.1021/La304151r	Himanshu Jasuja	2012
[83]	Synthesis of Cobalt-, Nickel-, Copper-, and Zinc-Based, Water-Stable, Pillared Metal–Organic Frameworks	DOI: 10.1021/La503269f	Himanshu Jasuja	2014
[84]	Reversible Structural Change of Cu-MOF on Exposure to Water and Its CO2 Adsorptivity	DOI: 10.1021/la803818p	Yan Cheng	2009
[85]	Experimental Study of Water Adsorption on Activated Carbons	DOI: 10.1021/la980492h	Issa I. Salame	1999
[86]	A flexible interpenetrating coordination framework with a bimodal porous functionality	DOI: 10.1038/Nmat1827	Tapas Kumar Maji	2007
[87]	Selective guest sorption in an interdigitated porous framework with hydrophobic pore surfaces	DOI: 10.1039/B703502k	Satoshi Horike	2007
[88]	A cubic coordination framework constructed from benzobistriazolate ligands and zinc ions having selective gas sorption properties	DOI: 10.1039/B904280f	Shyam Biswas,	2009
[89]	Enhanced selectivity of CO2 from a ternary gas mixture in an interdigitated porous framework	DOI: 10.1039/C0cc00027b	Keiji Nakagawa	2010
[90]	A microporous luminescent metal–organic framework for highly selective and sensitive sensing of Cu2+ in aqueous solution	DOI: 10.1039/C0cc00148a	Yunqing Xiao	2010
[91]	Construction of a trigonal bipyramidal cage-based metal–organic framework with hydrophilic pore surface via flexible tetrapodal ligands	DOI: 10.1039/C0cc02496a	Tian-Fu Liu	2010
[92]	Single-crystal-to-single-crystal transformations and selective adsorption of porous copper(ii) frameworks	DOI: 10.1039/C0cc04689b	Man-Sheng Chen	2011
[93]	Selective carbon dioxide uptake and crystal-to-crystal transformation: porous 3D framework to 1D chain triggered by conformational change of the spacer	DOI: 10.1039/C1ce05847a	Ritesh Haldar	2012
[94]	CO2capture and conversion using Mg-MOF-74 prepared by a sonochemical method	DOI: 10.1039/C1ee02234b	Da-Ae Yang	2012
[95]	A microporous metal–organic framework with high stability for GC separation of alcohols from water	DOI: 10.1039/C2cc33023g	Tsolmon Borjigin	2012
[96]	Post-synthesis functionalization of MIL-101 using diethylenetriamine: a study on adsorption and catalysis	DOI: 10.1039/C2ce06608d	Se-Na Kim	2012
[97]	Controlled modification of the inorganic and organic bricks in an Al-based MOF by direct and post-synthetic synthesis routes	DOI: 10.1039/C2ce06620c	Tim Ahnfeldt	2012
[98]	Two ligand-functionalized Pb(ii) metal–organic frameworks: structures and catalytic performances	DOI: 10.1039/C2dt30935a	Xiao-Ming Lin	2012
[99]	Carbon dioxide adsorption by physisorption and chemisorption interactions in piperazine-grafted Ni2(dobdc) (dobdc = 1,4-dioxido-2,5-benzenedicarboxylate)	DOI: 10.1039/C2dt31112g	Anita Das	2012
[100]	A robust microporous metal–organic framework constructed from a flexible organic linker for highly selective sorption of methanol over ethanol and water	DOI: 10.1039/C2jm15604k	Qian Huang	2012
[101]	Reversible solid-state hydration and dehydration process involving anion transfer in a self-assembled Cu2 system	DOI: 10.1039/C2ra21865h	T. Washizaki	2012
[102]	A charge-polarized porous metal–organic framework for gas chromatographic separation of alcohols from water	DOI: 10.1039/C3cc38260e	Jian-Ke Sun	2013
[103]	Polyoxometalate-based purely inorganic porous frameworks with selective adsorption and oxidative catalysis functionalities	DOI: 10.1039/C3cc40990b	Ding Liu	2013
[104]	Environmentally friendly synthesis of highly hydrophobic and stable MIL-53 MOF nanomaterials	DOI: 10.1039/C3cc42287a	Jia Liu	2013
[105]	An unusual highly connected 3D net with hydrophilic pore surface	DOI: 10.1039/C3ce26788a	Huabin Zhang	2013
[106]	Toxic gas removal – metal–organic frameworks for the capture and degradation of toxic gases and vapours	DOI: 10.1039/C3cs60475f	Elisa Barea	2014
[107]	Selective CO2 adsorption and proton conductivity in the two-dimensional Zn(ii) framework with protruded water molecules and flexible ether linkers	DOI: 10.1039/C3dt50896j	Won Ju Phang	2013
[108]	Zn(ii) coordination polymer of an in situ generated 4-pyridyl (4Py) attached bis(amido)phosphate ligand, [PO2(NH4Py)2]− showing preferential water uptake over aliphatic alcohols	DOI: 10.1039/C3dt51123e	Arvind K. Gupta,	2013
[109]	Postsynthetic tuning of hydrophilicity in pyrazolate MOFs to modulate water adsorption properties	DOI: 10.1039/C3ee40876k	Casey R. Wade	2013
[110]	Synthesis of reduced graphene oxide/phenolic resin-based carbon composite ultrafine fibers and their adsorption performance for volatile organic compounds and water	DOI: 10.1039/c3ta10545h	Yu Bai	2013
[111]	Water adsorption in MOFs: fundamentals and applications	DOI: 10.1039/C4cs00078a	Jérôme Canivet	2014
[112]	A highly stable multifunctional three-dimensional microporous framework: excellent selective sorption and visible photoluminescence	DOI: 10.1039/C4dt00230j	Yumei Huang	2014
[113]	Manufacture of dense CAU-10-H coatings for application in adsorption driven heat pumps: optimization and characterization	DOI: 10.1039/c5ce00789e	M. F. de Lange	2015
[114]	New layered copper 1,3,5-benzenetriphosphonates pillared with N-donor ligands: their synthesis, crystal structures, and adsorption properties	DOI: 10.1039/c5dt01137j	Atsushi Kondo	2015
[115]	Water stable triazolyl phosphonate MOFs: steep water uptake and facile regeneration	DOI: 10.1039/c5dt02651b	S. Begum	2015
[116]	Rational design of a pyrene based luminescent porous supramolecular framework: excimer emission and energy transfer	DOI: 10.1039/c5ra14267a	Komal Prasad	2015
[117]	Synthesis, Structure, and Properties of a Chiral Zinc(II) Metal-Organic Framework Featuring Linear Trinuclear Secondary Building Blocks	DOI: 10.1071/Ch12270	Zilu Chen	2012
[118]	A porous Cu(II)-MOF containing [PW12O40]3−and a large protonated water cluster: synthesis, structure, and proton conductivity	DOI: 10.1080/00958972.2014.957689	Meilin Wei	2014
[119]	Adsorption of Radon and Water Vapor on Commercial Activated Carbons	DOI: 10.1080/01496399508225610	Neguib M. Hassan	1995
[120]	Molecular Simulation Study on Adsorption and Diffusion Behavior of Ethanol/Water Molecules in NaA Zeolite Crystal	DOI: 10.1252/Jcej.37.67	Shin-ichi Furukawa	2004
[121]	Dependence of Water Vapour Adsorption on the Polarity of the Graphene Surfaces of Multi-wall Carbon Nanotubes	DOI: 10.1260/0263-6174.28.10.903	Robert Bradley	2010
[122]	Enhanced Adsorption of Methanol by Oxidised Nutshell Carbon	DOI: 10.1260/0263617001493422	Alan Bailey	2000
[123]	A microporous Zn(ii)–MOF with open metal sites: structure and selective adsorption properties	DOI: 10.1039/C4dt00307a	Xiaofang Zheng	2014
[124]	A Stable Polyoxometalate-Pillared Metal-Organic Framework for Proton-Conducting and Colorimetric Biosensing	DOI: 10.1002/chem.201501515	En-Long Zhou	2015
[125]	Protection of open-metal V(III) sites and their associated CO2/CH4/N2/O2/H2O adsorption properties in mesoporous V-MOFs	DOI: 10.1016/j.jcis.2015.06.036	Jiangfeng Yang	2015
[126]	Stability of an Al-Fumarate MOF and Its Potential for CO2 Capture from Wet Stream	DOI: 10.1021/acs.iecr.5b03509	Juliana A. Coelho	2016
[127]	A metal–organic framework constructed using a flexible tripodal ligand and tetranuclear copper cluster for sensing small molecules	DOI: 10.1039/c5dt00762c	Chaoyi Hou	2015
[128]	Enhancing the Water Capacity in Zr-based Metal-Organic Framework for Heat Pump and Atmospheric Water Generator Applications	DOI: 10.1021/acsanm.9b00416	A. Luna-Triguero	2019
[129]	A robust large-pore zirconium carboxylate metal–organic framework for energy-efficient water-sorption-driven refrigeration		Sujing Wang	2018
[130]	The porous metal-organic framework CUK-1 for adsorption heat allocation toward green applications of natural refrigerant water	DOI: 10.1021/acsami.9b02605	Ji Sun Lee	2019
[131]	A metal–organic framework for efficient waterbased ultra-low-temperature-driven cooling	DOI: 10.1038/s41467-019-10960-0	Dirk Lenzen	2019
[132]	Record Atmospheric Fresh Water Capture and Heat Transfer with a Material Operating at the Water Uptake Reversibility Limit	DOI: 10.1021/acscentsci.7b00186	Adam J. Rieth	2017
[133]	Tunable Water and CO2 Sorption Properties in Isostructural AzineBased Covalent Organic Frameworks through Polarity Engineering	DOI: 10.1021/acs.chemmater.5b02151	Linus Stegbauer	2015
[134]	Pd loaded amphiphilic COF as catalyst for multi-fold Heck reactions, C-C couplings and CO oxidation	DOi: 10.1038/srep10876	Dinesh Mullangi	2015
[135]	Pore surface engineering in porous, chemically stable covalent organic frameworks for water adsorption†	DOI: 10.1039/c5ta07998e	Bishnu P. Biswal	2015
[136]	Constructing Ultraporous Covalent Organic Frameworks in Seconds via an Organic Terracotta Process	DOI: 10.1021/jacs.6b08815	Suvendu Karak	2017
[137]	Microporous Cyanate Resins: Synthesis, Porous Structure, and Correlations with Gas and Vapor Adsorptions	DOI: 10.1021/ma3008652	Hao Yu	2012
[138]	Nitrogen-Rich Covalent Triazine Frameworks as High-Performance Platforms for Selective Carbon Capture and Storage	DOI: 10.1021/acs.chemmater.5b03330	Stephan Hug	2015
[139]	Base-Free Aqueous-Phase Oxidation of 5-Hydroxymethylfurfural over Ruthenium Catalysts Supported on Covalent Triazine Frameworks	DOI: 10.1002/cssc.201501106.	Jens Artz	2015
[140]	A mixed-linker approach towards improving covalent triazine-based frameworks for CO2 capture and separation	DOI: 10.1016/j.micromeso.2016.11.033	Subarna Dey	2017
[141]	Two linkers are better than one: enhancing CO2 capture and separation with porous covalent triazine-based frameworks from mixed nitrile linkers	DOI: 10.1039/c6ta07076k	Subarna Dey	2017
[142]	Preparation of covalent triazine frameworks with imidazolium cations embedded in basic sites and their application for CO2 capture	DOI: 10.1039/c6ta11226a	Kwangho Park	2017
[143]	A fluorine-containing hydrophobic covalent triazine framework with excellent selective CO2 capture performance	DOI: 10.1039/c7ta08913a	Guangbo Wang	2018
[144]	Mesoporous Conjugated Polycarbazole with High Porosity via Structure Tuning	DOI: 10.1021/ma501330v	Qi Chen	2014
[145]	Adsorption performance and catalytic activity of porous conjugated polyporphyrins via carbazolebased oxidative coupling polymerization	DOI: 10.1039/c3py01430d	Li-Juan Feng	2014
[146]	Microporous Poly(Schiff Base) Constructed from Tetraphenyladamantane Units for Adsorption of Gases and Organic Vapors	DOI: 10.1002/marc.201400013	Guiyang Li	2014
[147]	Microporous polyimides with functional groups for the adsorption of carbon dioxide and organic vapors	DOI: 10.1039/c6ta04337b	Guiyang Li	2016
[148]	Evaluation of a robust, diimide-based, porous organic polymer (POP) as a high-capacity sorbent for representative chemical threats	DOI: 10.1007/s10934-011-9468-7	Gregory W. Peterson	2012
[149]	Tailoring Pore Structure and Properties of Functionalized Porous Polymers by Cyclotrimerization	DOI: 10.1021/ma500512j	Florian M. Wisser	2014
[150]	Microporous Organic Polyimides for CO2 and H2O Capture and Separation from CH4 and N2 Mixtures: Interplay between Porosity and Chemical Function	DOI: 10.1021/acs.chemmater.6b01949	Christoph Klumpen	2016
[151]	Reversible water capture by a charged metal-free porous polymer	DOI: 10.1016/j.polymer.2017.05.071	J. Byun	2017
[152]	Epoxy-Functionalized Porous Organic Polymers via the Diels–Alder Cycloaddition Reaction for Atmospheric Water Capture	DOI: 10.1002/ange.201800380	Yearin Byun	2018
[153]	New element organic frameworks via Suzuki coupling with high adsorption capacity for hydrophobic molecules	DOI: 10.1039/c003130e	Marcus Rose	2010
[154]	Guest-Responsive Reversible Swelling and Enhanced Fluorescence in a Super-Absorbent, Dynamic Microporous Polymer	DOI: 10.1002/chem.201103750	K. Venkata Rao	2012

## Sheet: Table S3
Table S3. Fitting parameters of 311 water adsorption isotherms using universal adsorption isotherm model.
Number	Adsorbent	Literature	Species	Tiso (K)	α1	ε1	m1	α2	ε2	m2	α3	ε3	m3	chi-square a	reduced chi-square a
Carb-1	293WVA 1100 oxidized	[85]	Carbon	293	0.502346	3754.11	326.196	0.497654	6781.67	1737.51	n.p.	n.p.	n.p.	0.0227768	0.00069021
Carb-2	Activated Carbon	[94]	Carbon	298	0.269821	4907.45	2009.08	0.730179	5826.81	277.312	n.p.	n.p.	n.p.	0.500687	0.0161512
Carb-3	Activated Carbon AT400R1t75	[23]	Carbon	298	0.552305	1337.61	322.299	0.447695	2044.03	949.343	n.p.	n.p.	n.p.	0.00854658	0.00056977
Carb-4	Activated Carbon AT467R117t45	[23]	Carbon	298	0.502457	1017.19	274.297	0.497543	1769.72	783.487	n.p.	n.p.	n.p.	0.0131009	0.00093578
Carb-5	Activated Carbon AT600R1t30	[23]	Carbon	298	0.507212	1399.27	397.756	0.492788	3049.35	1197.32	n.p.	n.p.	n.p.	0.0155762	0.00053711
Carb-6	Activated Carbon AT800R15t120	[23]	Carbon	298	0.648834	1244.25	396.517	0.202104	5629.16	1394.39	0.149063	2814.97	102.82	0.0058324	0.00058324
Carb-7	Activated PVDC Carbon S850	[20]	Carbon	293	0.837645	1548.28	320.139	0.162355	4062.81	560.92	n.p.	n.p.	n.p.	0.00175707	0.00019523
Carb-8	BD-Carbon	[119]	Carbon	298	0.631568	1118.81	163.781	0.142596	3246.94	803.59	0.225836	964.875	26.6187	0.00588112	0.00196037
Carb-9	BPL-Carbon	[119]	Carbon	298	0.910686	1202.54	201.661	0.0893141	2105.37	340.872	n.p.	n.p.	n.p.	0.00273379	0.00024853
Carb-10	Carbon	[42]	Carbon	298	0.222917	378.945	56.4381	0.777083	1510.12	526.193	n.p.	n.p.	n.p.	0.0164071	0.00056576
Carb-11	Carbon AG5	[43]	Carbon	298	0.49993	934.541	222.567	0.50007	1567.26	651.403	n.p.	n.p.	n.p.	0.0150408	0.00188009
Carb-12	Carbon AG5-H2O2	[43]	Carbon	298	0.867423	1186.59	402.749	0.132577	4311.02	1127.99	n.p.	n.p.	n.p.	0.0136402	0.00113669
Carb-13	Carbon AG5-HClO4	[43]	Carbon	298	0.844472	1211.59	371.849	0.155528	3410.43	904.879	n.p.	n.p.	n.p.	0.00431243	0.00043124
Carb-14	Carbon AG5-HNO3	[43]	Carbon	298	0.504254	1265.47	364.089	0.495746	2089.65	648.957	n.p.	n.p.	n.p.	0.00730004	0.00104286
Carb-15	Carbon AG5-HNO3 (356K)	[43]	Carbon	298	0.325143	674.568	192.883	0.674857	3929.49	1538.84	n.p.	n.p.	n.p.	0.0132804	0.0011067
Carb-16	Carbon Molecular Sieve	[79]	Carbon	293	0.502026	2094.56	197.404	0.497974	2570.7	844.958	n.p.	n.p.	n.p.	0.00723654	0.00027833
Carb-17	Carbon WD	[43]	Carbon	298	0.49689	963.446	315.269	0.0515013	4144.09	841.672	0.451609	526.591	33.8519	0.00141166	0.00023528
Carb-18	Carbon WD-H2O2	[43]	Carbon	298	0.46139	634.953	65.2334	0.53861	1470.8	548.958	n.p.	n.p.	n.p.	0.0123859	0.00112599
Carb-19	Carbon WD-HClO4	[43]	Carbon	298	0.451775	1833.27	584.343	0.548225	793.311	156.659	n.p.	n.p.	n.p.	0.00838132	0.00093126
Carb-20	Carbon WD-HNO3 (356K)	[43]	Carbon	298	0.503305	1054.01	531.927	0.496695	6300.55	1820.41	n.p.	n.p.	n.p.	0.0183946	0.00153289
Carb-21	Charcoal	[122]	Carbon	293	0.670014	1189.11	279.364	0.148795	2383.76	169.157	0.181191	3464.71	722.799	0.0069408	0.00040828
Carb-22	Coal based steam activated carbon	[22]	Carbon	298	0.35603	2551.24	98.2996	0.409732	3243.53	305.153	0.234238	6366.95	1347.36	0.00730897	0.00045681
Carb-23	Coconut based steam activated carbon	[22]	Carbon	298	0.528089	3015.08	275.382	0.23157	6187.92	1255.21	0.240341	2523.59	61.0697	0.00870132	0.00054383
Carb-24	Eucalyptus Charcoal	[38]	Carbon	298	0.343002	32.8443	0.272998	0.656998	2485.84	998.73	n.p.	n.p.	n.p.	0.0103727	0.00094297
Carb-25	Eucalyptus Charcoal heated to 1273K	[38]	Carbon	298	0.508056	1496.08	291.276	0.491944	2575.76	1115.15	n.p.	n.p.	n.p.	0.00562923	0.00080418
Carb-26	Holm-Oak Charcoal	[38]	Carbon	298	0.32983	1237.4	514.758	0.249597	50.5326	17.8011	0.420573	4758.45	1769.32	0.0195577	0.00391154
Carb-27	Holm-Oak Charcoal heated to 1023K	[38]	Carbon	298	0.600613	25.1	0.671127	0.399387	2398.76	935.537	n.p.	n.p.	n.p.	0.00484303	0.00060538
Carb-28	MWCNT	[121]	Carbon	298	0.522323	1154.79	547.263	0.477677	9085.26	3113.93	n.p.	n.p.	n.p.	0.0246304	0.00136836
Carb-29	NPC E0	[25]	Carbon	298	0.385612	427.206	85.7656	0.31095	2868.74	1347.84	0.303439	227.449	22.7012	0.0105237	0.00070158
Carb-30	NPC E1	[25]	Carbon	298	0.506445	338.549	68.0716	0.493555	1874.77	698.444	n.p.	n.p.	n.p.	0.0141835	0.00177294
Carb-31	PCB-Carbon	[119]	Carbon	298	0.893181	1640.06	347.837	0.106819	3586.61	788.815	n.p.	n.p.	n.p.	0.00743642	0.00092955
Carb-32	Sonicated Fenton MWCNT	[121]	Carbon	298	0.832427	519.664	1061.08	0.501043	7318.36	3070.19	n.p.	n.p.	n.p.	0.00280649	0.00017541
Carb-33	Sorbonorit 4 Activated Carbon	[75]	Carbon	293	0.502852	1738.82	301.235	0.131771	3462.73	1865.17	0.365377	913.997	62.0023	0.00179295	0.00012807
Carb-34	Wood based phosphoric acid activated carbon	[22]	Carbon	298	0.499375	3427.62	277.254	0.500625	7539.28	2308.03	n.p.	n.p.	n.p.	0.0524818	0.00154358
Carb-35	WVA 1100	[85]	Carbon	293	0.520253	3401.01	353.137	0.479747	7395.22	1907.79	n.p.	n.p.	n.p.	0.0320801	0.00110621
Carb-36	Xtrusorb	[85]	Carbon	298	0.511677	3576.1	269.22	0.488323	6147.79	1348.52	n.p.	n.p.	n.p.	0.0300962	0.00091201
Carb-37	Xtrusorb oxidized	[85]	Carbon	298	0.498253	3026.67	166.293	0.501747	4344.7	1127.56	n.p.	n.p.	n.p.	0.0478648	0.00104054
C-1	2,5-DhaTab	[135]	COF	298	0.0973812	1566.61	745.632	0.902619	512.335	45.0848	n.p.	n.p.	n.p.	0.00388094	0.00021561
C-2	2,3-DhaTph	[135]	COF	298	0.547371	915.881	384.44	0.452629	3581.02	917.427	n.p.	n.p.	n.p.	0.021491	0.00143273
C-3	2,5-DhaTph	[135]	COF	298	0.837135	994.453	97.8887	0.162865	691.894	2295.39	n.p.	n.p.	n.p.	0.0124495	0.00082996
C-4	AB-COF	[133]	COF	288	0.372108	1923.57	779.13	0.627892	3438.31	68.3942	n.p.	n.p.	n.p.	0.0107457	0.0002336
C-5	AB-COF	[133]	COF	298	0.681521	3361.62	63.3584	0.318479	3012.83	539.769	n.p.	n.p.	n.p.	0.00517381	0.0001669
C-6	Ad2L1	[140]	COF	293	0.497577	386.296	48.0981	0.502423	924.128	333.856	n.p.	n.p.	n.p.	0.0535613	0.00111586
C-7	Ad2L2	[140]	COF	293	0.618822	477.479	111.153	0.381178	1439.43	564.559	n.p.	n.p.	n.p.	0.0442428	0.00119575
C-8	Ad2L3	[140]	COF	293	0.609821	537.865	127.65	0.132817	3683.9	947.168	0.257362	1243.04	220.671	0.0126651	0.00028145
C-9	Ad3L1	[140]	COF	293	0.645825	563.863	108.672	0.268967	1124.02	167.518	0.0852082	2955.58	715.5	0.00538049	0.00012513
C-10	Ad3L2	[140]	COF	293	0.620702	446.235	79.6608	0.379298	1096.92	341.929	n.p.	n.p.	n.p.	0.0372084	0.00086531
C-11	Ad3L3	[140]	COF	293	0.507137	552.592	84.4648	0.492863	1019.82	280.992	n.p.	n.p.	n.p.	0.0236069	0.00041416
C-12	Ad4L1	[140]	COF	293	0.887182	1211.69	312.826	0.112818	3557.65	846.314	n.p.	n.p.	n.p.	0.00868395	0.00014972
C-13	Ad4L2	[140]	COF	293	0.501524	481.311	86.5794	0.498476	870.437	250.806	n.p.	n.p.	n.p.	0.0275022	0.00039858
C-14	Ad4L3	[140]	COF	293	0.834413	1416.01	364.451	0.116752	4318.37	1096.1	0.0488351	479.563	53.9495	0.00310065	5.9628e-05
C-15	ATFG-COF	[133]	COF	288	0.307306	671.421	239.06	0.692694	4309.24	927.052	n.p.	n.p.	n.p.	0.00934327	0.00031144
C-16	ATFG-COF	[133]	COF	298	0.367549	322.918	136.589	0.632451	3967.63	1197.45	n.p.	n.p.	n.p.	0.0170186	0.00048624
C-17	bipy -CTF500	[138]	COF	298	0.500448	1972.09	655.191	0.499552	3581.49	1369.04	n.p.	n.p.	n.p.	0.0233757	0.00036524
C-18	bpim -CTF -300	[142]	COF	298	0.505268	1170.08	663.672	0.251719	167.488	56.2371	0.243013	6070.87	1042.52	0.0544054	0.00075563
C-19	bpim -CTF -400	[142]	COF	298	0.504849	2306.9	979.092	0.495151	4723.95	2068.52	n.p.	n.p.	n.p.	0.0408275	0.00031406
C-20	bpim -CTF -500	[142]	COF	298	0.734716	1945.15	523.053	0.265284	3166.63	2222.78	n.p.	n.p.	n.p.	0.0215658	0.00022464
C-21	CE-1	[137]	COF	293	0.511117	599.187	158.707	0.488883	2276.58	930.472	n.p.	n.p.	n.p.	0.0229235	0.00163739
C-22	CE-2	[137]	COF	293	0.50187	1118.95	313.574	0.49813	3572.46	1469	n.p.	n.p.	n.p.	0.0167865	0.00119903
C-23	CE-3	[137]	COF	293	0.518177	1147.81	303.074	0.481823	2978.74	1304.4	n.p.	n.p.	n.p.	0.0184405	0.00131718
C-24	CTF-a	[139]	COF	292.5	0.504674	869.44	139.668	0.495326	1150.11	472.662	n.p.	n.p.	n.p.	0.0168013	0.00034288
C-25	CTF-b	[139]	COF	292.5	0.822395	2168.86	712.633	0.177605	6044.25	1074.53	n.p.	n.p.	n.p.	0.00952645	0.0002977
C-26	CTF-c	[139]	COF	292.5	0.498085	1259.65	288.129	0.501915	1944.77	762.985	n.p.	n.p.	n.p.	0.0145385	0.00041539
C-27	CTF-d	[139]	COF	292.5	0.592695	618.974	216.546	0.0705018	2791.94	495.861	0.336803	338.461	32.0549	0.0269652	0.00081713
C-28	DCBP -CTF - 1	[143]	COF	293	0.508802	880.998	214.709	0.206646	1926.34	702.233	0.284551	335.591	27.9398	0.0107757	0.00017104
C-29	F -DCBP -CTF - 1	[143]	COF	293	0.496482	339.859	84.6579	0.415297	1288.89	450.881	0.0882208	3802.6	861.481	0.0755061	0.00279652
C-30	MM1	[141]	COF	293	0.505477	1033.2	235.175	0.289609	1972.94	591.979	0.204913	568.929	87.226	0.00687421	0.0001809
C-31	MM2	[141]	COF	293	0.725247	1922.25	629.527	0.211499	4411.92	1610.25	0.0632544	2356.41	63.014	0.00862063	0.00026123
C-32	MM3	[141]	COF	293	0.606634	721.611	165.214	0.104894	1901.39	446.694	0.288472	453.631	56.5875	0.00650856	0.00014463
C-33	MM4	[141]	COF	293	0.0821988	5020.22	1124.86	0.917801	1424.18	460.611	n.p.	n.p.	n.p.	0.0102482	0.00031055
C-34	pym -CTF500	[138]	COF	298	0.391001	1489.86	679.691	0.608999	7853.38	2917.17	n.p.	n.p.	n.p.	0.0384936	0.00060146
C-35	TpAnq	[136]	COF	298	0.642224	1850.64	932.941	0.0435379	3234.23	69.2945	0.314238	2591.73	29.4195	0.0173209	0.00144341
C-36	Tp-Azo	[135]	COF	298	0.500414	974.575	341.959	0.354917	1430.14	48.7091	0.144669	2843.7	911.213	0.00629376	0.00057216
C-37	Tp-Azo	[136]	COF	298	0.606939	1240.38	406.957	0.393061	1424.39	79.3393	n.p.	n.p.	n.p.	0.0218797	0.00145864
C-38	TpBD	[135]	COF	298	0.499158	1977.52	1181.99	0.500842	1864.83	85.1311	n.p.	n.p.	n.p.	0.0191033	0.00127355
C-39	TpBD	[136]	COF	298	0.506635	1192.14	677.137	0.493365	1965.69	132.346	n.p.	n.p.	n.p.	0.0183104	0.00122069
C-40	TpBD-(NO2)2	[135]	COF	298	0.502913	1318.54	269.126	0.497087	2185.92	1358.43	n.p.	n.p.	n.p.	0.0188344	0.00117715
C-41	TpBD-(NO2)2	[136]	COF	298	0.331444	630.022	225.713	0.30281	2607.87	19.7437	0.365746	2219.43	861.162	0.0107144	0.00089287
C-42	TpBD-(OMe)2	[135]	COF	298	0.845741	1318.98	392.942	0.154259	4340.7	1398.79	n.p.	n.p.	n.p.	0.0108258	0.00072172
C-43	TpBD-(OMe)2	[136]	COF	298	0.979023	1325.06	450.04	0.0209768	6736.51	445.161	n.p.	n.p.	n.p.	0.0286812	0.00191208
C-44	TpBD-Me2	[135]	COF	298	0.845741	1318.98	392.942	0.154259	4340.7	1398.79	n.p.	n.p.	n.p.	0.0108258	0.00072172
C-45	TpBD-Me2	[136]	COF	298	0.827992	1252.97	514.229	0.172008	1696.07	39.6908	n.p.	n.p.	n.p.	0.0196872	0.00131248
C-46	TpBpy	[136]	COF	298	0.349302	1613.41	594.098	0.650698	2183.44	99.7711	n.p.	n.p.	n.p.	0.00234467	0.00015631
C-47	TpPa-1	[135]	COF	298	0.628114	2706.17	1232.61	0.371886	4031.37	22.9771	n.p.	n.p.	n.p.	0.0136671	0.00105132
C-48	TpPa-1	[136]	COF	298	0.451068	635.306	218.197	0.548932	3643.7	509.667	n.p.	n.p.	n.p.	0.0157256	0.00104838
C-49	TpPa-2	[135]	COF	298	0.899988	2109.98	1045.08	0.100012	2907.45	60.1273	n.p.	n.p.	n.p.	0.0273045	0.00170653
C-50	TpPa-2	[136]	COF	298	0.294951	784.34	228.363	0.705049	3177.03	703.992	n.p.	n.p.	n.p.	0.00595121	0.00039675
C-51	TpPa-F4	[135]	COF	298	0.178853	2025.36	872.989	0.821147	1060.01	136.796	n.p.	n.p.	n.p.	0.0028341	0.00018894
C-52	TpPa-NO2	[135]	COF	298	0.178853	2025.36	872.989	0.821147	1060.01	136.796	n.p.	n.p.	n.p.	0.0028341	0.00018894
C-53	TpPa-NO2	[136]	COF	298	0.48326	787.559	262.943	0.51674	4001.62	664.649	n.p.	n.p.	n.p.	0.00952487	0.00063499
C-54	TpTph	[136]	COF	298	0.161812	1684.69	1436.23	0.838188	1143	151.763	n.p.	n.p.	n.p.	0.00487247	0.00032483
C-55	TpTta	[136]	COF	298	0.457327	551.991	132.665	0.542673	2962.69	782.219	n.p.	n.p.	n.p.	0.00798899	0.0005326
C-56	trzn-COF	[134]	COF	298	0.50475	860.485	384.594	0.49525	3956.81	1517.12	n.p.	n.p.	n.p.	0.0309819	0.00067352
C-57	trzn-COF	[134]	COF	308	0.510178	1177.94	513.013	0.489822	4674.44	1655.72	n.p.	n.p.	n.p.	0.019064	0.00052955
M-1	(H2dab)[Zn2(ox)3]	[70]	MOF	298	0.306957	8766.32	1603.35	0.0499207	86008.9	232.158	0.643123	808.809	92.0018	0.0112379	0.00027409
M-2	[{Zn(L)(H2O)2}(NO3)2*2H2O]n	[4]	MOF	298	0.52882	626.342	279.071	0.150542	4965.85	1028.22	0.320638	2227.11	174.795	0.00890053	0.00052356
M-3	[Cd(mpto)2.CH3CH2OH]n	[24]	MOF	298	0.856283	1144.64	454.452	0.143717	12467	3158.51	n.p.	n.p.	n.p.	0.017157	0.00095316
M-4	[Co2(BDC)2(BPNO)]*H2BDC*2MeOH	[19]	MOF	298	0.500489	2285.76	1094.92	0.499511	11358.6	1681.48	n.p.	n.p.	n.p.	0.0123193	0.00087995
M-5	[Co3(ndc)-(HCOO)3(mu3-OH)(H2O)]n	[15]	MOF	298	0.821781	3773.78	1411.81	0.178219	4302.69	92.833	n.p.	n.p.	n.p.	0.0106029	0.0011781
M-6	[Cu(INA)2(NH3)2(H2O)2]	[35]	MOF	298	0.519577	626.148	284.137	0.480423	3819.02	1462.8	n.p.	n.p.	n.p.	0.0148528	0.00123773
M-7	[Cu(INA)2]	[35]	MOF	298	0.520865	1277.91	402.038	0.479135	4331.69	1731.43	n.p.	n.p.	n.p.	0.00560449	0.00046704
M-8	[Cu(INAIP)]*2H2O	[92]	MOF	298	0.503767	6593.57	221.406	0.496233	6833.15	1840.68	n.p.	n.p.	n.p.	0.00721822	0.0006562
M-9	[Cu2(H2btp)(H2O)2(12-bis(4-pyridl)ethylene)]	[114]	MOF	303	0.526565	1906.3	800.401	0.473435	6631.29	1498.19	n.p.	n.p.	n.p.	0.00767242	0.00028416
M-10	[Cu2(H2btp)(H2O)2(13-bis(4-pyridl)propane)]	[114]	MOF	303	0.530884	2336.68	966.934	0.469116	6735.41	1482.66	n.p.	n.p.	n.p.	0.0074342	0.00074342
M-11	[Cu2(H2btp)(H2O)2(bipyridine)]	[114]	MOF	303	0.506145	2900.83	1029.68	0.493855	5786.12	1569.18	n.p.	n.p.	n.p.	0.0072867	0.00029147
M-12	[Cu2(pzdc)2(pyz)]*2H2O}	[30]	MOF	303	0.969259	4226.32	2810.95	0.209982	10597.4	28.8334	n.p.	n.p.	n.p.	0.0290674	0.00581348
M-13	[Mn(mpto)2.CH3CH2OH]2	[24]	MOF	298	0.522038	1549.69	232.458	0.477962	2187.14	599.34	n.p.	n.p.	n.p.	0.00162296	0.00010143
M-14	[Ni(dipn)]2[Ni(dipn)(H2O)][Fe(CN)6]2.2H2O	[66]	MOF	298	0.523824	961.695	469.878	0.476176	5895.68	1873.03	n.p.	n.p.	n.p.	0.0212936	0.00078865
M-15	[Ni(pca)(bdc)0.5(H2O)2]	[58]	MOF	298	0.496969	1161.83	434.65	0.503031	4663.91	2023.56	n.p.	n.p.	n.p.	0.0196113	0.00108952
M-16	[Ni8(L5)6]	[6]	MOF	298	0.153115	338.33	2140.76	0.846885	868.308	109.357	n.p.	n.p.	n.p.	0.00904644	0.00075387
M-17	[Ni8(L5-CF3)6]	[6]	MOF	298	0.93668	457.926	60.3291	0.0633198	2919.35	1166.59	n.p.	n.p.	n.p.	0.00080235	4.7197e-05
M-18	[Ni8(L5-CH3)6]	[106]	MOF	298	0.366774	804.675	853.145	0.633226	891.776	35.1532	n.p.	n.p.	n.p.	0.0211944	0.00078498
M-19	[PbL2]*2DMF*6H2O	[98]	MOF	298	0.499445	431.316	100.718	0.330314	4031.84	1819.96	0.170242	1236.09	11.1685	0.00783151	0.00130525
M-20	[PbL2]*DMF*2H2O	[98]	MOF	298	0.455572	1675.62	762.828	0.157796	9482.9	27.9488	0.386632	8758.6	658.715	0.00981114	0.00163519
M-21	[Zn(NO2-BDC)(dmbpy).5](C2H6O)(H2O)	[47]	MOF	298	0.558257	1596.69	448.456	0.276337	1872.88	1050.05	0.165406	1960.92	30.9655	0.0211639	0.00084655
M-22	[Zn2(ip)2(bpy)2]*DMF}n	[87]	MOF	298	0.504148	2996.08	161.355	0.374465	5613.25	1623.94	0.121387	4307.9	94.6146	0.0150873	0.00301746
M-23	[Zn3(TCPB)2*2H2O]*2H2O*4DMF	[10]	MOF	298	0.483444	3179.55	1151.03	0.243495	580.157	201.704	0.273061	5453.09	17.8795	0.00387811	0.00055402
M-24	[Zn4O(mipcapz)3]n on [Zn4O(dmcapz)3]n	[1]	MOF	298	0.804632	698.738	175.8	0.195368	2478.52	567.755	n.p.	n.p.	n.p.	0.00197556	0.00032926
M-25	{(H2PIP)0.5[VO(CEP)]*H2O}	[56]	MOF	298	0.503332	2896.62	811.808	0.496668	3484.22	79.2143	n.p.	n.p.	n.p.	0.0030137	0.00033486
M-26	{[Cu(azpy)(glut)](H2O)2}	[50]	MOF	298	0.566442	3077.9	107.235	0.256673	3030.45	960.188	0.176886	376.182	50.4897	0.0147849	0.00164277
M-27	{[Cu2(4-pmpmd)2(CH3OH)4(opd)2]*2H2O}	[52]	MOF	298	0.330916	248.803	44.5547	0.669084	2450.53	460.133	n.p.	n.p.	n.p.	0.0144401	0.00144401
M-28	{[Cu2(pzdc)2(bpy)]*4H2O}	[30]	MOF	303	0.500825	5064.41	1742.31	0.0415987	45100.4	110.445	0.457577	8888.13	603.881	0.00381672	0.00042408
M-29	{[Cu4(OH)2(tci)2-(bpy)2]·11H2O}	[127]	MOF	298	0.330531	1082.35	306.725	0.669469	4115.44	1159.24	n.p.	n.p.	n.p.	0.00661317	0.00082665
M-30	{[Dy(ox)(Bpybc)(H2O)]*OH*13H2O}n	[102]	MOF	298	0.503903	1201.38	187.001	0.496097	4107.04	1445.38	n.p.	n.p.	n.p.	0.00966116	0.00107346
M-31	{[Ni(bpe)2(N(CN)2)](N(CN)2)}n	[86]	MOF	298	0.377542	811.145	238.221	0.622458	4343.97	1760.86	n.p.	n.p.	n.p.	0.0385681	0.00083844
M-32	{[Zn-(C10H2O8)0.5(C10S2N2H8)]*5H2O]}n	[60]	MOF	298	0.455391	1382.88	509.86	0.544609	7415.46	399.468	n.p.	n.p.	n.p.	0.0101395	0.00077996
M-33	{[Zn(oxo-pba)2(bpy)]4H2O}n	[116]	MOF	298	0.637025	684.363	160.378	0.362975	4842.72	2068.99	n.p.	n.p.	n.p.	0.0204039	0.00136026
M-34	{[Zn2(bpdc)2(azpy)]*2H2O*2DMF}n	[61]	MOF	298	0.314243	4533.59	1551.74	0.685757	1087.17	369.68	n.p.	n.p.	n.p.	0.00862457	0.00066343
M-35	{[Zn2(bpdc)2(azpy)]*2H2O*2DMF}n Nanoscale	[61]	MOF	298	0.477293	969.86	415.062	0.522707	4705.22	1861.32	n.p.	n.p.	n.p.	0.0184863	0.00168057
M-36	{[Zn3(bpdc)3(azpy)]*4H2O*2DEF}n	[61]	MOF	298	0.452338	482.818	81.4342	0.547662	3632.9	1693.69	n.p.	n.p.	n.p.	0.022165	0.001705
M-37	{[Zn4O(bfbpdc)3-(bpy)0.5(H2O)]*(3DMF)(H2O)}n	[59]	MOF	298	0.029183	869.245	224.599	0.970817	276.627	20.4372	n.p.	n.p.	n.p.	0.00108437	8.3413e-05
M-38	{[ZnL(HCO2)(H2O)]*DMF}	[108]	MOF	298	0.659379	1761.47	378.391	0.198253	4444.95	3335.9	0.142368	2029.93	35.625	0.00817563	0.0006813
M-39	1 C76H116N14O42Zn3	[117]	MOF	298	0.501983	867.354	472.636	0.0264413	3765.45	63.3967	0.471576	5001.14	1714.79	0.0252482	0.00072138
M-40	1-LiCl	[111]	MOF	298	0.607952	3437.95	649.652	0.203173	6897.54	40.7449	0.188875	4886.07	6.52728	0.0163945	0.00409863
M-41	2D [Cu(bpy)2(OTf)2]n	[69]	MOF	303	0.672567	4696.21	954.583	0.0219287	166112	233.48	0.305504	528.263	42.9281	0.00331925	0.0002766
M-42	Aluminum fumarate	[126]	MOF	288	0.506178	3856.7	867.67	0.408293	4585.96	59.4305	0.0855297	9470.88	1251.1	0.00951903	0.00105767
M-43	Blucher-101408	[106]	MOF	298	0.645251	717.158	175.805	0.354749	556.182	31.9111	n.p.	n.p.	n.p.	0.0020904	9.9543e-05
M-44	Bu-FeCr	[111]	MOF	298	0.518268	779.805	307.363	0.481732	4052.88	1589.8	n.p.	n.p.	n.p.	0.0295714	0.00246429
M-45	C10H4O12Eu2	[90]	MOF	298	0.55939	2903.71	985.3	0.44061	7794.13	1868.9	n.p.	n.p.	n.p.	0.00544059	0.00019431
M-46	C115.5H202N14O43Zn4	[91]	MOF	298	0.536308	1109.73	435.395	0.463692	4798.04	1082.29	n.p.	n.p.	n.p.	0.0102317	0.00113685
M-47	C11H15BrN2O4Zn	[72]	MOF	298	0.501868	1511.16	491.198	0.0175516	40960.8	434.012	0.480581	6446.47	1545.68	0.00726914	0.00033042
M-48	C11H15ClN2O4Zn	[72]	MOF	298	0.615534	2081.81	120.861	0.384466	3292.06	1503.1	n.p.	n.p.	n.p.	0.0568803	0.00203144
M-49	C12H17ClN2O3Cd	[51]	MOF	303	0.273736	391.039	96.4797	0.120947	1543.93	525.368	0.605317	393.354	10.5173	0.0428965	0.00214483
M-50	C15H27N2O10Dy	[53]	MOF	298	0.979598	5309.28	1284.24	0.020402	116272	167.379	n.p.	n.p.	n.p.	0.00604608	0.00043186
M-51	C15H27N2O10Er	[53]	MOF	298	0.9487	4501.38	1190.85	0.0513004	51123.3	72.0013	n.p.	n.p.	n.p.	0.0092179	0.00065842
M-52	C15H27N2O10Ho	[53]	MOF	298	0.947979	5259.55	1202.06	0.0520206	13437.3	2153.64	n.p.	n.p.	n.p.	0.00077061	5.1374e-05
M-53	C15H27N2O10Tb	[53]	MOF	298	0.517475	5236.31	889.6	0.482525	7913.84	1240.82	n.p.	n.p.	n.p.	0.00110943	0.00015849
M-54	C15H27N2O10Tm	[53]	MOF	298	0.507653	2863.37	629.075	0.492347	5442.67	1198.52	n.p.	n.p.	n.p.	0.0012386	8.2574e-05
M-55	C18H21Br2N4O9Cd2	[51]	MOF	303	0.405929	837.119	336.614	0.594071	4843.01	1778.07	n.p.	n.p.	n.p.	0.0203299	0.00092409
M-56	C24H40N2O16Cl2Cd3	[37]	MOF	298	0.822274	6225.14	1780.07	0.177726	207.153	79.2135	n.p.	n.p.	n.p.	0.0198164	0.00031962
M-57	C26H24Br2Cu2N8O3	[101]	MOF	298	0.999076	9467.48	1700.2	0.000923493	16086.4	117.145	1.74217e-08	9624.56	71.8343	0.0032134	0.00053557
M-58	C28H24CoN10	[93]	MOF	298	0.506454	524.605	153.286	0.493546	4093.69	2243.34	n.p.	n.p.	n.p.	0.0191582	0.00127721
M-59	C32H24Cu3N6O12	[13]	MOF	288	0.741871	4788.26	2042.18	0.0383258	130614	4749.62	0.219803	5193.84	173.766	0.0244773	0.00059701
M-60	C32H46N4O8Zn	[100]	MOF	298	0.546794	1084.81	262.39	0.00393539	8337.62	53.5227	0.44927	4186.95	1403.06	0.0221784	0.00221784
M-61	C4H8HoKO12 Dehydrated	[54]	MOF	298	0.535648	8553.54	526.268	0.464352	8536.52	2623.43	n.p.	n.p.	n.p.	0.038878	0.00259187
M-62	C55H52Fe4N20O18	[32]	MOF	298	0.758574	5585.69	2306.93	0.241426	9051.16	141.44	n.p.	n.p.	n.p.	0.0295368	0.00210977
M-63	C62H44N2O8Zn2	[57]	MOF	298	0.619108	154.452	0.792987	0.380892	2106.84	1003.89	n.p.	n.p.	n.p.	0.00632615	0.00039538
M-64	C62H50Cd3K2N2O26	[105]	MOF	298	0.505015	2225.93	507.905	0.494985	5073.84	1281.53	n.p.	n.p.	n.p.	0.0136243	0.00040071
M-65	C9H11ClN2O4Cd	[51]	MOF	303	0.504267	4800.66	1920.1	0.495733	5462.21	563.813	n.p.	n.p.	n.p.	0.0404864	0.00119078
M-66	CALF-25	[73]	MOF	298	0.647108	804.272	283.054	0.352892	3973.34	1539.36	n.p.	n.p.	n.p.	0.018209	0.00121393
M-67	CAU-10-CH3	[111]	MOF	298	0.606472	1639.05	371.738	0.151009	6239.89	1724.63	0.242519	2014.03	24.7185	0.00514792	0.00030282
M-68	CAU-10-H	[111]	MOF	298	0.374274	2911.8	1262.18	0.350639	4243.65	5.81631	0.275087	4499.97	6.17744	0.362915	0.0259225
M-69	CAU-10-NH2	[111]	MOF	298	0.501692	4082.05	784.296	0.498308	7757.76	2433.14	n.p.	n.p.	n.p.	0.0049774	0.00020739
M-70	CAU-10-NO2	[111]	MOF	298	0.5019	2666.3	168.111	0.4981	3056.37	564.694	n.p.	n.p.	n.p.	0.00713932	0.00037575
M-71	CAU-10-OCH3	[111]	MOF	298	0.293463	3724.14	1352.8	0.706537	3330.58	33.815	n.p.	n.p.	n.p.	0.0187436	0.00156197
M-72	CAU-10-OH	[111]	MOF	298	0.556738	3495.6	1781.1	0.167066	4366.11	55.0686	0.276196	5140.37	50.6229	0.0266927	0.00088976
M-73	CAU-10-pydc	[2]	MOF	303	0.471067	5733	650.685	0.0176472	10624.5	55.6988	0.511286	5988.54	2115.59	0.00562562	0.00029609
M-74	CAU-13	[62]	MOF	298	0.546533	2663.44	1553.06	0.453467	3868.92	61.2004	n.p.	n.p.	n.p.	0.0177353	0.00104325
M-75	CAU-1-NH2	[97]	MOF	298	0.501819	2054.02	163.352	0.061664	5606.07	1196.82	0.436517	1634.78	365.873	0.00214636	9.7562e-05
M-76	CAU-1-NHCH3	[97]	MOF	298	0.81102	2370.66	172.862	0.18898	2113.5	4194.55	n.p.	n.p.	n.p.	0.0254429	0.00082074
M-77	CAU-1-NHCOCH3	[97]	MOF	298	0.728752	2717.91	698.982	0.0474043	6171.32	139.251	0.223843	7095.98	3347.99	0.00607442	0.00026411
M-78	CAU-23	[131]	MOF	298	0.745529	3212.71	55.6809	0.254471	2219.41	1254.93	n.p.	n.p.	n.p.	0.0215041	0.00074152
M-79	Cd (II)-MOF [Cd(L)(DMF)]	[112]	MOF	298	0.521397	2364.37	1094.99	0.478603	8172.39	1567.73	n.p.	n.p.	n.p.	0.0113599	0.00043692
M-80	CID-3	[89]	MOF	298	0.575182	1414.13	596.96	0.424818	1262.94	59.7704	n.p.	n.p.	n.p.	0.0126902	0.00070501
M-81	Co2Cl2(BTDD)	[132]	MOF	298	0.273219	4808.7	1962.34	0.726781	3061.12	14.9688	n.p.	n.p.	n.p.	0.00961169	0.00048058
M-82	Cobalt Triazolyl Phosphonate MOF	[115]	MOF	298	0.5014	6166.04	260.811	0.4986	4465.79	2064.5	n.p.	n.p.	n.p.	0.0210731	0.00150522
M-83	Cobalt Triazolyl Phosphonate MOF (95%RH)	[115]	MOF	298	0.432101	3951.04	2061	0.102313	28273.9	39.5298	0.465586	6068.82	76.0436	0.0140905	0.00100646
M-84	Cobalt Triazolyl Phosphonate MOF (Activated at 403K)	[115]	MOF	298	0.504975	983.154	391.361	0.495025	4870	1307.12	n.p.	n.p.	n.p.	0.0204421	0.00078624
M-85	Co-CUK-1	[130]	MOF	303	0.208709	3634.85	1436.99	0.791291	5183.32	68.0118	n.p.	n.p.	n.p.	0.0136501	0.000546
M-86	Co-MOF-74(M)	[27]	MOF	298	0.000666609	4018.01	247.323	1.59648e-06	48202.6	67.3838	0.999332	8789.76	1708.75	0.0153995	0.00384987
M-87	Co-MOF-74(S)	[27]	MOF	298	0.933003	8420.79	1283.27	0.0669971	42876.2	4.29338e+09	n.p.	n.p.	n.p.	0.00941796	0.00235449
M-88	CPO-27-Ni	[99]	MOF	298	0.50284	7727.53	3311.87	0.49716	11849.3	1588.03	n.p.	n.p.	n.p.	0.0210817	0.00055478
M-89	Cr-MIL(101)	[111]	MOF	298	0.341587	1982.73	68.2383	0.542525	1491.4	123.126	0.115887	4689.16	626.69	0.025176	0.00048415
M-90	Cr-MIL-101-NO2	[111]	MOF	298	0.667705	1974.48	111.778	0.185165	2915.03	2382.04	0.14713	1555.78	34.4987	0.0546236	0.00121386
M-91	Cu6(Trz)10(H2O)4[H2SiW12O40]·8H2O	[124]	MOF	298	0.369886	512.321	108.912	0.630114	3538.78	1073.46	n.p.	n.p.	n.p.	0.00809855	0.00057847
M-92	CuBTC	[42]	MOF	298	0.675464	4814.23	1658.32	0.1742	9456.9	49.3955	0.150336	815.954	79.7932	0.00744981	0.00024032
M-93	Cu-MOF	[84]	MOF	303	0.47193	10605.2	2264.05	0.52807	15773.4	90.2238	2.00451e-09	12837.1	73.3195	0.0013389	0.00066945
M-94	DETA-MIL-101	[96]	MOF	298	0.607507	1267.65	494.355	0.392493	8539.52	2462.51	n.p.	n.p.	n.p.	0.0209035	0.00209035
M-95	DMOF-Cl2	[82]	MOF	298	0.631632	2345.28	33.1769	0.368368	2549.35	1194.27	n.p.	n.p.	n.p.	0.00420671	0.00070112
M-96	DMOF-NO2	[82]	MOF	298	0.633592	1947.79	129.957	0.366408	6801.99	2546.33	n.p.	n.p.	n.p.	0.0165725	0.00069052
M-97	DMOF-OH	[82]	MOF	298	0.902182	3543.64	1301.76	0.0978178	1271.66	37.4851	n.p.	n.p.	n.p.	0.00907017	0.00151169
M-98	DUT-10(Zn)	[18]	MOF	298	0.314576	384.932	89.4233	0.227271	1895.24	539.187	0.458152	230.121	41.8991	0.00511756	0.00102351
M-99	DUT-4	[40]	MOF	298	0.986261	1015.7	374.641	0.013739	5830.37	1941.03	n.p.	n.p.	n.p.	0.0378782	0.00291371
M-100	DUT-67	[74]	MOF	298	0.503223	2572.15	359.778	0.231963	6710.33	1063.47	0.264813	3421.13	49.9707	0.0115834	0.00048264
M-101	ED-ZIF-8	[3]	MOF	298	0.333394	1727.92	134.816	0.278398	4490.42	835.463	0.388208	2620.77	349.666	0.00217865	0.00043573
M-102	Et-MnCr	[111]	MOF	298	0.512585	2359.23	1193.12	0.487415	3249.85	428.126	n.p.	n.p.	n.p.	0.044339	0.00170535
M-103	HKUST-1-F	[11]	MOF	298	0.707847	94.9475	6.88932	0.292153	6392.67	2062.86	n.p.	n.p.	n.p.	0.155781	0.00370908
M-104	JUC-110	[95]	MOF	298	0.55939	2903.71	985.3	0.44061	7794.13	1868.9	n.p.	n.p.	n.p.	0.00544059	0.00019431
M-105	Lanthanum Triazolyl Phosphonate MOF	[115]	MOF	298	0.391869	3807.99	3049.19	0.608131	3453.77	114.768	n.p.	n.p.	n.p.	0.0776851	0.00369929
M-106	Me-FeCr	[111]	MOF	298	0.512656	1547.77	79.8063	0.14004	5347.66	2413.77	0.347303	2408.55	270.441	0.0107017	0.00031475
M-107	MFU-4	[88]	MOF	298	0.700605	3827.17	558.859	0.299395	2871.42	1533.01	n.p.	n.p.	n.p.	0.00509063	0.00084844
M-108	Mg-CPO-27	[111]	MOF	298	0.500029	7164.55	2738.93	0.499971	27513.2	160.262	n.p.	n.p.	n.p.	0.00603418	0.00067046
M-109	Mg-CUK-1	[130]	MOF	303	0.328581	2467.22	681.026	0.671419	3546.61	117.994	n.p.	n.p.	n.p.	0.0261065	0.00137402
M-110	Mg-MOF-74©	[94]	MOF	298	0.304278	2608.44	1411.77	0.317609	15783.5	54.5568	0.378112	9380.37	758.962	0.0210419	0.00045743
M-111	MIL-100	[36]	MOF	293	0.743355	3033.5	482.542	0.0787963	931.218	58.4306	0.177849	4999.5	2782.73	0.00434744	0.00048305
M-112	MIL-100(Cr)	[49]	MOF	298	0.731382	985.567	360.093	0.268618	4171.3	2201.74	n.p.	n.p.	n.p.	0.0188045	0.00208939
M-113	MIL-100(Cr)-DEG	[33]	MOF	293	0.791778	1061.74	1795.84	0.444717	2486.56	370.08	n.p.	n.p.	n.p.	0.00795079	0.00088342
M-114	MIL-100(Cr)-EG	[33]	MOF	293	0.684451	2084.65	756.585	0.142003	2550.36	43.199	0.173545	5469.52	2616.46	0.00834059	0.00104257
M-115	MIL-100(Cr)-EN	[33]	MOF	293	0.713852	2163.91	843.558	0.141109	3005.13	337.738	0.145039	6349.31	2008.05	0.00642222	0.00080278
M-116	MIL-100(Cr)-TEG	[33]	MOF	293	0.685031	1879.21	785.567	0.104018	6624.06	1734.37	0.210951	2665.57	170.088	0.00804615	0.00080461
M-117	MIL-100(Fe)	[40]	MOF	298	0.621864	2408.05	365.063	0.0932026	8461.04	526.408	0.284933	2447.38	1011.06	0.0170227	0.00130943
M-118	MIL-100V	[125]	MOF	298	0.434562	1847.25	433.771	0.565438	6178.95	1912.12	n.p.	n.p.	n.p.	0.00654863	0.00065486
M-119	MIL-101-NH2	[41]	MOF	298	0.323691	1473.74	1091.14	0.305998	2074.55	74.5731	0.370311	2482.96	32.6259	0.0430004	0.00119445
M-120	MIL-101-SO3H	[41]	MOF	298	0.565383	2945.15	557.429	0.251749	5187.71	3339.36	0.182868	2457.9	16.5748	0.0211994	0.00052998
M-121	MIL-101V	[125]	MOF	298	0.514902	3332.32	1339.49	0.256263	902.618	43.781	0.228835	10109.7	1273.78	0.00625235	0.0005684
M-122	MIL-125	[28]	MOF	298	0.456981	2482.84	102.73	0.317129	2280.34	3.65733	0.225891	1650.26	1089.35	0.00410394	0.00031569
M-123	MIL-125-NH2	[111]	MOF	298	0.492814	4139.95	133.55	0.507186	4372.9	1195.19	n.p.	n.p.	n.p.	0.00848237	0.00056549
M-124	MIL-160	[2]	MOF	303	0.417007	5602.21	1692.24	0.0103317	124668	175.497	0.572661	6303.94	526.377	0.00682446	0.0003102
M-125	MIL-163	[8]	MOF	298	0.62787	1353.9	190.196	0.37213	2540.06	2235.25	n.p.	n.p.	n.p.	0.0211497	0.00060428
M-126	MIL-53(Al)ht	[104]	MOF	298	0.906468	5198.05	454.655	0.0935323	1794.98	741.218	n.p.	n.p.	n.p.	0.00181373	9.5459e-05
M-127	MIL-53(Al)it	[104]	MOF	298	0.495934	1104	89.4036	0.504066	2054.8	1138.51	n.p.	n.p.	n.p.	0.0131529	0.00065764
M-128	MIL-53(Cr)	[67]	MOF	298	0.780831	52.0721	46.3358	0.219169	5010.95	464.544	n.p.	n.p.	n.p.	0.220284	0.0314691
M-129	MIP-200	[129]	MOF	303	0.53283	4237.46	123.238	0.46717	8273.98	4010.79	n.p.	n.p.	n.p.	0.0225336	0.0009389
M-130	Mn2Cl2(BTDD)	[132]	MOF	298	0.302483	477.96	116.786	0.697517	4544.66	1924.59	n.p.	n.p.	n.p.	0.0255045	0.0017003
M-131	NBu4	[111]	MOF	298	0.505808	816.536	424.349	0.494192	4027.48	1900.83	n.p.	n.p.	n.p.	0.0442781	0.00368984
M-132	NENU-11	[68]	MOF	298	0.500213	4840.62	429.332	0.499787	5931.22	1371.32	n.p.	n.p.	n.p.	0.0142568	0.00025921
M-133	Ni2Cl2(BTDD)	[132]	MOF	298	0.66111	2803.98	40.8587	0.33889	4417.01	2109.29	n.p.	n.p.	n.p.	0.0120402	0.00054728
M-134	Ni3C87H118N12O29	[55]	MOF	298	0.510934	746.853	314.716	0.489066	4205.26	1329.15	n.p.	n.p.	n.p.	0.0232248	0.0009677
M-135	Ni-CUK-1	[130]	MOF	303	0.213688	2757.72	1528.5	0.786312	5105.78	146.741	n.p.	n.p.	n.p.	0.00392554	0.00013536
M-136	Ni-DOBDC	[80]	MOF	298	0.463666	5400.99	3628.45	1.85096e-05	122772	172.924	0.536315	9750.56	255.978	0.0223493	0.00372489
M-137	Pip-CPO-27-Ni	[99]	MOF	298	0.723051	7695.04	3314.4	0.276949	14944.2	52.6242	n.p.	n.p.	n.p.	0.0415452	0.00109329
M-138	PIZOF-2	[74]	MOF	298	0.470192	733.065	60.1039	0.529808	666.33	18.3589	n.p.	n.p.	n.p.	0.0104386	0.00041755
M-139	pretreated a-Al	[113]	MOF	298	0.357451	3330.1	1303.38	0.12571	7192.67	2089.71	0.516839	4457.37	41.8483	0.0226576	0.0011925
M-140	pretreated m-Al	[113]	MOF	298	0.504771	3324.86	1108.81	0.111448	9448.81	823.194	0.383781	4015.05	32.4581	0.00441064	0.00027567
M-141	SIM-1	[111]	MOF	298	0.876079	2589.98	1178.64	0.01076	65711.2	103.03	0.113161	3816.5	23.1789	0.0230541	0.00144088
M-142	S-MIL-53(Al)	[39]	MOF	298	0.180971	659.766	197.733	0.344961	2134.58	180.53	0.474068	281.926	16.3449	0.00470578	0.00029411
M-143	SNU-80	[14]	MOF	298	0.489874	1018.9	576.331	0.510126	5310.18	1394.16	n.p.	n.p.	n.p.	0.0503122	0.00359373
M-144	TAF-1a	[16]	MOF	298	0.661688	2125.17	869.997	0.338312	7356.38	1998.59	n.p.	n.p.	n.p.	0.0166935	0.00104334
M-145	Ti(pyradine-2-carboxylic acid)	[11]	MOF	298	0.412089	1205.45	213.204	0.107568	2242.85	135.004	0.480343	4324.57	917.964	0.0212093	0.00132558
M-146	UiO-66	[74]	MOF	298	0.609352	2542.91	79.2177	0.0230642	6798.65	2200.59	0.367584	3133.56	899.075	0.00439239	0.00016894
M-147	UiO-66(Zr)-(COOH)2	[5]	MOF	303	0.304515	482.937	169.401	0.695485	4417.72	1790.38	n.p.	n.p.	n.p.	0.0142867	0.00142867
M-148	UiO-66(Zr4+) with high concentration stearic acid	[46]	MOF	298	0.387829	2890.32	128.162	0.478125	4581.3	2021.58	0.134046	4116.14	29.1345	0.0205513	0.00032111
M-149	UiO-66(Zr4+) with metal/ligand ratio 6:3	[46]	MOF	298	0.428496	2875.09	66.4307	0.458954	4888.71	2098.83	0.11255	3605.45	29.9674	0.0317589	0.00059922
M-150	UiO-66-NH2	[63]	MOF	298	0.517083	4380.53	400.607	0.482917	5589.41	2044.63	n.p.	n.p.	n.p.	0.00422706	0.00032516
M-151	UMCM-1	[63]	MOF	298	0.499287	573.389	125.885	0.999998	694.853	2029.5	n.p.	n.p.	n.p.	0.0026725	0.00089083
M-152	untreated a-Al	[113]	MOF	298	0.545565	3351.16	787.322	0.454435	9012.84	1956.07	n.p.	n.p.	n.p.	0.00297384	0.00021242
M-153	untreated m-Al	[113]	MOF	298	0.465261	3002.82	1507.11	0.0106712	4304.02	169.242	0.524068	4514.5	28.4181	0.0264351	0.00085274
M-154	Y-fum-fcu-MOF	[7]	MOF	298	0.56522	4156.19	1258.51	0.172976	5729.9	304.307	0.261804	6464.65	83.5495	0.00541576	0.00022566
M-155	ZIF-8	[57]	MOF	298	0.931	140.857	33.0471	0.0689997	1307.73	57.2448	n.p.	n.p.	n.p.	0.0729237	0.00383809
M-156	Zn(II)-MOF [Zn(HPylmDC)(DMA)]n	[123]	MOF	298	0.507281	1884.82	945.222	0.492719	8797.82	2746.49	n.p.	n.p.	n.p.	0.0207628	0.00083051
M-157	Zn(L)(tdca)*1.5DMF	[118]	MOF	298	0.499966	4088.22	616.926	0.4867	6576.54	1904.1	0.0133339	28676.4	40.2567	0.00941698	0.00052317
M-158	Zn(NDI-H)	[109]	MOF	293	0.816913	2001.68	86.4671	0.183087	2044.07	766.618	n.p.	n.p.	n.p.	0.00276507	0.00025137
M-159	Zn(NDI-NHEt)	[109]	MOF	293	0.407534	2005.04	732.101	0.592466	1936.2	54.7043	n.p.	n.p.	n.p.	0.00744827	0.00046552
M-160	Zn(NDI-SEt)	[111]	MOF	293	0.438776	1273.66	477.548	0.304453	3642	245.188	0.25677	6475.79	1477.96	0.0101104	0.00045957
M-161	Zn(NDI-SO2Et)	[111]	MOF	293	0.566983	2776.58	1162.5	0.433017	2579.3	195.028	n.p.	n.p.	n.p.	0.00978313	0.00054351
M-162	Zn(NDI-SOEt)	[111]	MOF	293	0.438776	1273.66	477.548	0.304453	3642	245.188	0.25677	6475.79	1477.96	0.0101104	0.00045957
M-163	Zn(NO3)2*6H2O	[12]	MOF	293	0.985361	6524.09	1352.53	0.0146394	91592.7	171969240527843	n.p.	n.p.	n.p.	0.00432446	0.00061778
M-164	Zn2C14N2O8H4	[65]	MOF	298	0.644464	4614.06	540.565	0.343052	2338.02	312.153	0.0124835	13056.8	60.4683	0.00580891	0.00027661
M-165	Zn3(TCPB)2(H2O)2	[107]	MOF	298	0.505488	358.512	254.645	0.494512	3893.09	1473	n.p.	n.p.	n.p.	0.0451565	0.00282228
M-166	Zn4O(dmcapz)3	[71]	MOF	298	0.501181	401.626	311.082	0.498819	498.509	86.0461	n.p.	n.p.	n.p.	0.0346863	0.00088939
M-167	Zn-BTTB-DMBPY	[83]	MOF	298	0.937923	535.03	10.8705	0.0620773	2611.04	1023.1	n.p.	n.p.	n.p.	0.00021248	3.5413e-05
M-168	Zn-MOF-74(cycle 1)	[48]	MOF	298	0.248079	2335.72	778.419	0.0945362	14127.2	36.3076	0.657384	9894.05	2235.86	0.0175474	0.0006749
M-169	Zr-MOF-801-P	[74]	MOF	298	0.506838	4461.04	1482.83	0.493162	6298.7	258.838	n.p.	n.p.	n.p.	0.00571732	0.00025988
M-170	Zr-MOF-801-SC	[74]	MOF	298	0.496899	6060.59	180.832	0.503101	3248.12	964.524	n.p.	n.p.	n.p.	0.00584813	0.00036551
M-171	Zr-MOF-802	[74]	MOF	298	0.539938	2232.92	923.702	0.460062	7002.56	1567.61	n.p.	n.p.	n.p.	0.0106349	0.00055973
M-172	Zr-MOF-804	[74]	MOF	298	0.695395	2239.42	119.577	0.247545	2475.47	1064.09	0.05706	12721.9	2336.14	0.0168477	0.00080227
M-173	Zr-MOF-805	[74]	MOF	298	0.504792	2434	411.531	0.172137	2990.92	72.4152	0.323072	3462.96	1297.7	0.00363472	0.00017308
M-174	Zr-MOF-806	[74]	MOF	298	0.504591	3116.5	986.38	0.495409	7906.26	1333.44	n.p.	n.p.	n.p.	0.012691	0.00050764
M-175	Zr-MOF-808	[74]	MOF	298	0.494796	2864.04	126.806	0.182665	4284.11	3294.86	0.322539	2692.61	29.1926	0.0128877	0.00047732
M-176	Zr-MOF-841	[74]	MOF	298	0.339695	3016.22	645.868	0.660305	3445.72	15.9704	n.p.	n.p.	n.p.	0.0287634	0.00136969
P-1	2D ep-POP	[152]	POP	298	0.373209	624.086	131.89	0.626791	2252.21	799.597	n.p.	n.p.	n.p.	0.0147989	0.00046246
P-2	3D ep-POP	[152]	POP	298	0.513217	772.359	300.388	0.486783	3814.89	1027.47	n.p.	n.p.	n.p.	0.021455	0.00047678
P-3	COP-120	[151]	POP	298	0.503686	521.278	141.845	0.27246	1114.15	221.008	0.223855	5004.73	1601.16	0.036981	0.00108768
P-4	CP0P-11	[145]	POP	298	0.646907	175.001	92.0734	0.353093	1879.45	763.165	n.p.	n.p.	n.p.	0.0235752	0.0029469
P-5	CPOP-10	[144]	POP	298	0.507065	177.371	98.9697	0.364327	99.7398	35.7017	0.128609	2490.73	822.04	0.0149735	0.00062389
P-6	CPOP-12	[145]	POP	298	0.502598	335.323	94.8685	0.156582	1681.35	426.189	0.34082	779.693	155.705	0.00104613	0.00020923
P-7	CPOP-8	[144]	POP	298	0.141469	2202.77	674.457	0.858531	359.399	135.185	n.p.	n.p.	n.p.	0.00735731	0.00033442
P-8	CPOP-9	[144]	POP	298	0.950829	472.838	223.805	0.049171	6897.84	1297.49	n.p.	n.p.	n.p.	0.0344447	0.00080104
P-9	DUT-92	[149]	POP	298	0.510278	728.024	298.777	0.383171	171.426	54.9216	0.106552	2124.35	935.215	0.0169267	0.00044544
P-10	DUT-92(NH2)	[149]	POP	298	0.505093	572.798	297.575	0.494907	2485.26	676.303	n.p.	n.p.	n.p.	0.0259691	0.00112909
P-11	DUT-92(NO2)	[149]	POP	298	0.503373	447.073	209.255	0.378808	200.372	33.7762	0.117819	1985.68	356.328	0.0126363	0.00048601
P-12	DUT-93	[149]	POP	298	0.50469	566.991	228.118	0.49531	1512.85	782.171	n.p.	n.p.	n.p.	0.0267373	0.0007427
P-13	DUT-93(NH2)	[149]	POP	298	0.504999	542.64	248.986	0.495001	3168.94	1242.65	n.p.	n.p.	n.p.	0.0215043	0.00102401
P-14	DUT-93(NO2)	[149]	POP	298	0.486319	325.407	107.066	0.349049	129.586	20.0516	0.164632	2304.07	698.848	0.0127961	0.00055635
P-15	EOF-6(POP)	[153]	POP	298	0.495993	478.331	62.6186	0.481676	381.95	114.217	0.0223312	4085.27	1251.88	0.00425017	0.00010898
P-16	EOF-7(POP)	[153]	POP	298	0.582804	253.939	69.4436	0.129009	1956.27	630.989	0.288187	541.253	127.94	0.00674808	0.00026992
P-17	EOF-8(POP)	[153]	POP	298	0.801345	366.643	146.512	0.198655	1946.22	724.001	n.p.	n.p.	n.p.	0.0168785	0.0006028
P-18	EOF-9(POP)	[153]	POP	298	0.845785	414.528	142.634	0.154215	2012.88	728.785	n.p.	n.p.	n.p.	0.0122304	0.00035972
P-19	MOPI-I	[150]	POP	298	0.507955	1026.47	367.471	0.492045	3681.33	1209.21	n.p.	n.p.	n.p.	0.0241584	0.00109811
P-20	MOPI-II	[150]	POP	298	0.265721	604.516	91.9517	0.734279	2219.43	794.248	n.p.	n.p.	n.p.	0.0171009	0.00085505
P-21	MOPI-III	[150]	POP	298	0.51163	1275.58	436.541	0.48837	3755.76	1192.19	n.p.	n.p.	n.p.	0.0161208	0.00115149
P-22	MOPI-IV	[150]	POP	298	0.368363	800.591	215.329	0.631637	3057.45	1078.01	n.p.	n.p.	n.p.	0.01655	0.00047286
P-23	MOPI-V	[150]	POP	298	0.500848	972.094	254.748	0.499152	2164.32	1008.27	n.p.	n.p.	n.p.	0.0187493	0.00124995
P-24	MPI-6FA	[147]	POP	298	0.437441	787.624	102.65	0.239278	2997.79	683.709	0.323281	1391.65	189.536	0.00396699	0.00044078
P-25	MPI-BPA	[147]	POP	298	0.599219	1424.45	218.308	0.400781	1910.03	716.197	n.p.	n.p.	n.p.	0.00835396	0.00043968
P-26	MPI-BTA	[147]	POP	298	0.501094	1467.68	316.839	0.498906	2392.03	763.29	n.p.	n.p.	n.p.	0.00997758	0.00076751
P-27	NU-POP-1	[148]	POP	298	0.534649	1017.34	423.45	0.465351	3594.31	814.5	n.p.	n.p.	n.p.	0.0125013	0.00078133
P-28	OFC-1	[149]	POP	298	0.499568	210.655	99.5499	0.173495	1842.1	781.9	0.326936	841.865	213.18	0.0186927	0.00116829
P-29	PSN-3	[146]	POP	298	0.742922	1078.66	407.508	0.257078	3611.88	851.713	n.p.	n.p.	n.p.	0.0129748	0.00054062
P-30	Py-PP	[154]	POP	298	0.633812	1072.47	498.351	0.212876	365.837	59.6207	0.153312	5864.77	950.032	0.0152015	0.00152015
Z-1	CBV-901	[76]	Zeolite	294	0.312592	3317.45	102.024	0.687408	7485.2	2008.66	n.p.	n.p.	n.p.	0.0140075	0.00200107
Z-2	H0.34Na0.06Al0.4Si47.6O96	[21]	Zeolite	298	0.506298	1536.75	487.524	0.493702	4866.79	1000.13	n.p.	n.p.	n.p.	0.0058525	0.00058525
Z-3	HiSiv 3000 Zeolite	[75]	Zeolite	293	0.507345	3117.67	872.903	0.492655	8183.67	2936.89	n.p.	n.p.	n.p.	0.0113668	0.00075779
Z-4	K6Na6Al12O48	[21]	Zeolite	298	0.668746	13322	4495.86	0.331254	12024.4	16.3652	n.p.	n.p.	n.p.	0.168269	0.0105168
Z-5	MCM-41	[49]	Zeolite	298	0.7702	771.572	108.083	0.2298	2425.47	1261.03	n.p.	n.p.	n.p.	0.00851225	0.00106403
Z-6	NaX	[128]	Zeolite	298	0.320478	5676.82	2530.86	0.679522	14229.3	1022.6	n.p.	n.p.	n.p.	0.00206617	0.00012914
Z-7	Na-ZSM-5	[49]	Zeolite	298	0.248079	2335.72	778.419	0.0945362	14127.2	36.3076	0.657384	9894.05	2235.86	0.0175474	0.0006749
Z-8	Zeolite 13X	[42]	Zeolite	298	0.296552	4649.16	1951.07	0.703448	5804.55	304.662	n.p.	n.p.	n.p.	0.237813	0.0108097
Z-9	Zeolite 4A	[78]	Zeolite	298	0.50418	7411.19	2067.5	0.49582	16069.3	1934.26	n.p.	n.p.	n.p.	0.0024327	0.00018713
Z-10	Zeolite Na-A	[120]	Zeolite	298	0.497849	7178.52	1488.82	0.502151	9281.59	111.538	n.p.	n.p.	n.p.	0.0304129	0.00304129
Z-11	Zn2(pbc)2*Hdma*H3O*2H2O	[9]	Zeolite	298	0.727554	3107.02	1298.29	0.250151	8283.22	679.561	0.0222952	17390.3	24.2735	0.00841441	0.0021036
n.p. represents "no parameters" a Chi-sqare (χ2) and reduced chi-square (χv2) are statistical indicators that commonly used to judge the goodness of curve fitting. According to the rule of thumb, a "good" fitting has χv2 less than 1, and smaller χ2 usually means smaller fitting error with the reasonable fitting parameters.
We conducted chi-square goodness-of-fit test1 for each fitting, and provided statistical indicators including the chi-square (χ2) and reduced chi-square (χv2) that commonly used to judge the goodness of curve fitting in Table S1. According to the rule of thumb, a "good" fitting has χv2 less than 1, and smaller χ2 usually means smaller fitting error with the reasonable fitting parameters.2-3 All a…
1	Cochran, W. G., The χ2 test of goodness of fit. The Annals of Mathematical Statistics 1952, 23 (3), 315-345.
2	Chi-square: testing for goodness of fit. http://maxwell.ucsc.edu/~drip/133/ch4.pdf.
3	Chi square distribution (X2) and least squares fitting. https://www.asc.ohio-state.edu/gan.1/teaching/spring04/Chapter6.pdf.
4	LMFIT: Non-Linear Least-Squares Minimization and Curve-Fitting for Python. https://lmfit.github.io/lmfit-py/.

## Sheet: Table S4
Table S4. Structural characteristics of adsorbents collected from the literature.
Number	Adsorbent	Literature	Species	Sa (m2/g)	Va (cm3/g)	Dp (Å)
Carb-1	293WVA 1100 oxidized	[85]	Carbon	1330	0.521	25 c3
Carb-2	Activated Carbon	[94]	Carbon	n.d.	n.d.	n.d.
Carb-3	Activated Carbon AT400R1t75	[23]	Carbon	1128	0.644	12 c3
Carb-4	Activated Carbon AT467R117t45	[23]	Carbon	1117	0.675	12 c3
Carb-5	Activated Carbon AT600R1t30	[23]	Carbon	926	0.557	12 c3
Carb-6	Activated Carbon AT800R15t120	[23]	Carbon	990	0.656	12 c3
Carb-7	Activated PVDC Carbon S850	[20]	Carbon	n.d.	0.41	6.8 c1
Carb-8	BD-Carbon	[119]	Carbon	294	0.41	24 c1
Carb-9	BPL-Carbon	[119]	Carbon	823	0.57	26 c1
Carb-10	Carbon	[42]	Carbon	n.d.	n.d.	n.d.
Carb-11	Carbon AG5	[43]	Carbon	880	0.48	n.d.
Carb-12	Carbon AG5-H2O2	[43]	Carbon	922	0.51	n.d.
Carb-13	Carbon AG5-HClO4	[43]	Carbon	459	0.2	n.d.
Carb-14	Carbon AG5-HNO3	[43]	Carbon	993	0.54	n.d.
Carb-15	Carbon AG5-HNO3 (356K)	[43]	Carbon	497	0.28	n.d.
Carb-16	Carbon Molecular Sieve	[79]	Carbon	n.d.	0.32 b1	5 c1
Carb-17	Carbon WD	[43]	Carbon	1194	0.48	n.d.
Carb-18	Carbon WD-H2O2	[43]	Carbon	1018	0.44	n.d.
Carb-19	Carbon WD-HClO4	[43]	Carbon	991	0.43	n.d.
Carb-20	Carbon WD-HNO3 (356K)	[43]	Carbon	958	0.42	n.d.
Carb-21	Charcoal	[122]	Carbon	n.d.	0.31 b1	n.d.
Carb-22	Coal based steam activated carbon	[22]	Carbon	1207	0.95	n.d.
Carb-23	Coconut based steam activated carbon	[22]	Carbon	1408	0.76	n.d.
Carb-24	Eucalyptus Charcoal	[38]	Carbon	111	0.407 b2	5.4 c1
Carb-25	Eucalyptus Charcoal heated to 1273K	[38]	Carbon	735	0.666 b2	5.2 c1
Carb-26	Holm-Oak Charcoal	[38]	Carbon	640	0.864 b2	5.6 c1
Carb-27	Holm-Oak Charcoal heated to 1023K	[38]	Carbon	n.d.	0.941 b2	n.d.
Carb-28	MWCNT	[121]	Carbon	59.2	0.24	n.d.
Carb-29	NPC E0	[25]	Carbon	37.5	n.d.	n.d.
Carb-30	NPC E1	[25]	Carbon	35.4	n.d.	n.d.
Carb-31	PCB-Carbon	[119]	Carbon	663	0.58	41.7 c1
Carb-32	Sonicated Fenton MWCNT	[121]	Carbon	60.4	0.24	n.d.
Carb-33	Sorbonorit 4 Activated Carbon	[75]	Carbon	1400	0.1686 b1	5.9 c1
Carb-34	Wood based phosphoric acid activated carbon	[22]	Carbon	1615	1.2	n.d.
Carb-35	WVA 1100	[85]	Carbon	1710	0.645	25 c3
Carb-36	Xtrusorb	[85]	Carbon	1040	0.467	11 c3
Carb-37	Xtrusorb oxidized	[85]	Carbon	980	0.437	11 c3
C-1	2,5-DhaTab	[135]	COF	n.d.	n.d.	n.d.
C-2	2,3-DhaTph	[135]	COF	659	n.d.	20 c1
C-3	2,5-DhaTph	[135]	COF	1112	n.d.	20 c1
C-4	AB-COF	[133]	COF	1125	0.47	13 c1
C-5	AB-COF	[133]	COF	1125	0.47	13 c1
C-6	Ad2L1	[140]	COF	918	0.86	n.d.
C-7	Ad2L2	[140]	COF	1316	2.2	n.d.
C-8	Ad2L3	[140]	COF	747	0.45	n.d.
C-9	Ad3L1	[140]	COF	1199	0.8	n.d.
C-10	Ad3L2	[140]	COF	1093	0.96	n.d.
C-11	Ad3L3	[140]	COF	1328	0.93	n.d.
C-12	Ad4L1	[140]	COF	1617	0.9	n.d.
C-13	Ad4L2	[140]	COF	1885	1.52	n.d.
C-14	Ad4L3	[140]	COF	1341	0.74	n.d.
C-15	ATFG-COF	[133]	COF	520	0.5	13 c1
C-16	ATFG-COF	[133]	COF	520	0.5	13 c1
C-17	bipy -CTF500	[138]	COF	1548	0.71	8 c1
C-18	bpim -CTF -300	[142]	COF	2.4	n.d.	n.d.
C-19	bpim -CTF -400	[142]	COF	786	0..34	n.d.
C-20	bpim -CTF -500	[142]	COF	1556	0.75	n.d.
C-21	CE-1	[137]	COF	960	0.97	8.2 c1
C-22	CE-2	[137]	COF	588	0.47	7.8 c1
C-23	CE-3	[137]	COF	540	0.43	8.6 c1
C-24	CTF-a	[139]	COF	2439	1.96	n.d.
C-25	CTF-b	[139]	COF	1179	0.64	n.d.
C-26	CTF-c	[139]	COF	2071	1.36	n.d.
C-27	CTF-d	[139]	COF	1683	2.63	n.d.
C-28	DCBP -CTF - 1	[143]	COF	2437	1.48	n.d.
C-29	F -DCBP -CTF - 1	[143]	COF	1574	1.5	n.d.
C-30	MM1	[141]	COF	1800	1.11	n.d.
C-31	MM2	[141]	COF	1360	0.67	n.d.
C-32	MM3	[141]	COF	1884	1.52	n.d.
C-33	MM4	[141]	COF	1407	0.78	n.d.
C-34	pym -CTF500	[138]	COF	208	n.d.	8 c1
C-35	TpAnq	[136]	COF	1027	n.d.	16.3 c1
C-36	Tp-Azo	[135]	COF	942	n.d.	27 c1
C-37	Tp-Azo	[136]	COF	3038	n.d.	25.8 c1
C-38	TpBD	[135]	COF	341	n.d.	24 c1
C-39	TpBD	[136]	COF	1400	n.d.	21.8 c1
C-40	TpBD-(NO2)2	[135]	COF	90	n.d.	22 c1
C-41	TpBD-(NO2)2	[136]	COF	769	n.d.	16.3 c1
C-42	TpBD-(OMe)2	[135]	COF	365	n.d.	23 c1
C-43	TpBD-(OMe)2	[136]	COF	1343	n.d.	16.3 c1
C-44	TpBD-Me2	[135]	COF	n.d.	n.d.	n.d.
C-45	TpBD-Me2	[136]	COF	3109	n.d.	16.3 c1
C-46	TpBpy	[136]	COF	2336	n.d.	24.2 c1
C-47	TpPa-1	[135]	COF	984	n.d.	18 c1
C-48	TpPa-1	[136]	COF	1432	n.d.	14.8 c1
C-49	TpPa-2	[135]	COF	460	n.d.	15 c1
C-50	TpPa-2	[136]	COF	538	n.d.	10.6 c1
C-51	TpPa-F4	[135]	COF	529	n.d.	17 c1
C-52	TpPa-NO2	[135]	COF	457	n.d.	16 c1
C-53	TpPa-NO2	[136]	COF	850	n.d.	13.2 c1
C-54	TpTph	[136]	COF	1020	n.d.	25.8 c1
C-55	TpTta	[136]	COF	825	n.d.	8.6 c1
C-56	trzn-COF	[134]	COF	408.5	0.21	23 c1
C-57	trzn-COF	[134]	COF	408.5	0.21	23 c1
M-1	(H2dab)[Zn2(ox)3]	[70]	MOF	n.d.	n.d.	n.d.
M-2	[{Zn(L)(H2O)2}(NO3)2*2H2O]n	[4]	MOF	n.d.	n.d.	n.d.
M-3	[Cd(mpto)2.CH3CH2OH]n	[24]	MOF	25.8	n.d.	n.d.
M-4	[Co2(BDC)2(BPNO)]*H2BDC*2MeOH	[19]	MOF	n.d.	n.d.	5.8 c2
M-5	[Co3(ndc)-(HCOO)3(mu3-OH)(H2O)]n	[15]	MOF	1386	0.58	13.6 c2
M-6	[Cu(INA)2(NH3)2(H2O)2]	[35]	MOF	n.d.	n.d.	n.d.
M-7	[Cu(INA)2]	[35]	MOF	164.4	n.d.	4.99 c2
M-8	[Cu(INAIP)]*2H2O	[92]	MOF	n.d.	n.d.	n.d.
M-9	[Cu2(H2btp)(H2O)2(12-bis(4-pyridl)ethylene)]	[114]	MOF	2.8	0.095	13.4 c2
M-10	[Cu2(H2btp)(H2O)2(13-bis(4-pyridl)propane)]	[114]	MOF	3	0.083	14 c2
M-11	[Cu2(H2btp)(H2O)2(bipyridine)]	[114]	MOF	1.1	0.047	11.2 c2
M-12	[Cu2(pzdc)2(pyz)]*2H2O}	[30]	MOF	n.d.	n.d.	6 c2
M-13	[Mn(mpto)2.CH3CH2OH]2	[24]	MOF	86.2	n.d.	n.d.
M-14	[Ni(dipn)]2[Ni(dipn)(H2O)][Fe(CN)6]2.2H2O	[66]	MOF	n.d.	n.d.	n.d.
M-15	[Ni(pca)(bdc)0.5(H2O)2]	[58]	MOF	n.d.	n.d.	n.d.
M-16	[Ni8(L5)6]	[6]	MOF	2215	n.d.	n.d.
M-17	[Ni8(L5-CF3)6]	[6]	MOF	1985	n.d.	n.d.
M-18	[Ni8(L5-CH3)6]	[106]	MOF	n.d.	n.d.	n.d.
M-19	[PbL2]*2DMF*6H2O	[98]	MOF	n.d.	n.d.	13 c2
M-20	[PbL2]*DMF*2H2O	[98]	MOF	n.d.	n.d.	13 c2
M-21	[Zn(NO2-BDC)(dmbpy).5](C2H6O)(H2O)	[47]	MOF	925	n.d.	9 c3
M-22	[Zn2(ip)2(bpy)2]*DMF}n	[87]	MOF	300	n.d.	6 c2
M-23	[Zn3(TCPB)2*2H2O]*2H2O*4DMF	[10]	MOF	573	n.d.	4.3 c3
M-24	[Zn4O(mipcapz)3]n on [Zn4O(dmcapz)3]n	[1]	MOF	640	0.279	n.d.
M-25	{(H2PIP)0.5[VO(CEP)]*H2O}	[56]	MOF	n.d.	n.d.	n.d.
M-26	{[Cu(azpy)(glut)](H2O)2}	[50]	MOF	131 a	n.d.	7.8 c2
M-27	{[Cu2(4-pmpmd)2(CH3OH)4(opd)2]*2H2O}	[52]	MOF	n.d.	n.d.	6.48 c2
M-28	{[Cu2(pzdc)2(bpy)]*4H2O}	[30]	MOF	n.d.	n.d.	9 c2
M-29	{[Cu4(OH)2(tci)2-(bpy)2]·11H2O}	[127]	MOF	n.d.	n.d.	12.54 c2
M-30	{[Dy(ox)(Bpybc)(H2O)]*OH*13H2O}n	[102]	MOF	n.d.	n.d.	8.4 c2
M-31	{[Ni(bpe)2(N(CN)2)](N(CN)2)}n	[86]	MOF	n.d.	n.d.	6.78 c2
M-32	{[Zn-(C10H2O8)0.5(C10S2N2H8)]*5H2O]}n	[60]	MOF	n.d.	n.d.	12.7 c2
M-33	{[Zn(oxo-pba)2(bpy)]4H2O}n	[116]	MOF	n.d.	n.d.	6.2 c2
M-34	{[Zn2(bpdc)2(azpy)]*2H2O*2DMF}n	[61]	MOF	235	n.d.	8.2 c2
M-35	{[Zn2(bpdc)2(azpy)]*2H2O*2DMF}n Nanoscale	[61]	MOF	385	n.d.	n.d.
M-36	{[Zn3(bpdc)3(azpy)]*4H2O*2DEF}n	[61]	MOF	200	n.d.	11.9 c2
M-37	{[Zn4O(bfbpdc)3-(bpy)0.5(H2O)]*(3DMF)(H2O)}n	[59]	MOF	1450	0.59	10.76 c2
M-38	{[ZnL(HCO2)(H2O)]*DMF}	[108]	MOF	n.d.	n.d.	n.d.
M-39	1 C76H116N14O42Zn3	[117]	MOF	n.d.	n.d.	n.d.
M-40	1-LiCl	[111]	MOF	n.d.	n.d.	n.d.
M-41	2D [Cu(bpy)2(OTf)2]n	[69]	MOF	740	0.295	n.d.
M-42	Aluminum fumarate	[126]	MOF	971	0.85	n.d.
M-43	Blucher-101408	[106]	MOF	n.d.	n.d.	n.d.
M-44	Bu-FeCr	[111]	MOF	n.d.	n.d.	n.d.
M-45	C10H4O12Eu2	[90]	MOF	n.d.	n.d.	5 c2
M-46	C115.5H202N14O43Zn4	[91]	MOF	n.d.	n.d.	13 c2
M-47	C11H15BrN2O4Zn	[72]	MOF	n.d.	n.d.	n.d.
M-48	C11H15ClN2O4Zn	[72]	MOF	n.d.	n.d.	n.d.
M-49	C12H17ClN2O3Cd	[51]	MOF	n.d.	n.d.	9.8 c2
M-50	C15H27N2O10Dy	[53]	MOF	n.d.	n.d.	10.4 c2
M-51	C15H27N2O10Er	[53]	MOF	n.d.	n.d.	10.4 c2
M-52	C15H27N2O10Ho	[53]	MOF	n.d.	n.d.	10.4 c2
M-53	C15H27N2O10Tb	[53]	MOF	n.d.	n.d.	10.4 c2
M-54	C15H27N2O10Tm	[53]	MOF	n.d.	n.d.	10.4 c2
M-55	C18H21Br2N4O9Cd2	[51]	MOF	n.d.	n.d.	12 c2
M-56	C24H40N2O16Cl2Cd3	[37]	MOF	n.d.	0.07	8.4 c2
M-57	C26H24Br2Cu2N8O3	[101]	MOF	n.d.	n.d.	n.d.
M-58	C28H24CoN10	[93]	MOF	137	n.d.	6 c2
M-59	C32H24Cu3N6O12	[13]	MOF	445	n.d.	9.8 c2
M-60	C32H46N4O8Zn	[100]	MOF	n.d.	n.d.	7.21 c2
M-61	C4H8HoKO12 Dehydrated	[54]	MOF	69.1 a	0.1042	3.6 c2
M-62	C55H52Fe4N20O18	[32]	MOF	n.d.	n.d.	n.d.
M-63	C62H44N2O8Zn2	[57]	MOF	960	0.43	10.5 c2
M-64	C62H50Cd3K2N2O26	[105]	MOF	8.27	n.d.	12.7 c2
M-65	C9H11ClN2O4Cd	[51]	MOF	n.d.	n.d.	n.d.
M-66	CALF-25	[73]	MOF	385	n.d.	4.6 c2
M-67	CAU-10-CH3	[111]	MOF	n.d.	n.d.	n.d.
M-68	CAU-10-H	[111]	MOF	600	0.26	7 c2
M-69	CAU-10-NH2	[111]	MOF	n.d.	n.d.	n.d.
M-70	CAU-10-NO2	[111]	MOF	440	0.18	n.d.
M-71	CAU-10-OCH3	[111]	MOF	n.d.	n.d.	n.d.
M-72	CAU-10-OH	[111]	MOF	n.d.	n.d.	n.d.
M-73	CAU-10-pydc	[2]	MOF	926	0.43	n.d.
M-74	CAU-13	[62]	MOF	380	0.15	n.d.
M-75	CAU-1-NH2	[97]	MOF	1530	0.64	n.d.
M-76	CAU-1-NHCH3	[97]	MOF	1340	0.53	n.d.
M-77	CAU-1-NHCOCH3	[97]	MOF	680	0.3	n.d.
M-78	CAU-23	[131]	MOF	1250	n.d.	7.6 c2
M-79	Cd (II)-MOF [Cd(L)(DMF)]	[112]	MOF	231.31	n.d.	6 c2
M-80	CID-3	[89]	MOF	n.d.	n.d.	8.1 c2
M-81	Co2Cl2(BTDD)	[132]	MOF	1912	n.d.	22 c2
M-82	Cobalt Triazolyl Phosphonate MOF	[115]	MOF	n.d.	n.d.	13 c1
M-83	Cobalt Triazolyl Phosphonate MOF (95%RH)	[115]	MOF	n.d.	n.d.	13 c1
M-84	Cobalt Triazolyl Phosphonate MOF (Activated at 403K)	[115]	MOF	n.d.	n.d.	13 c1
M-85	Co-CUK-1	[130]	MOF	510	0.26	13.4 c2
M-86	Co-MOF-74(M)	[27]	MOF	1314	0.51	12 c1
M-87	Co-MOF-74(S)	[27]	MOF	1327	0.52	12 c1
M-88	CPO-27-Ni	[99]	MOF	n.d.	n.d.	11 c1
M-89	Cr-MIL(101)	[111]	MOF	3124	1.58	34 c2
M-90	Cr-MIL-101-NO2	[111]	MOF	2146	1.19	34 c2
M-91	Cu6(Trz)10(H2O)4[H2SiW12O40]·8H2O	[124]	MOF	n.d.	n.d.	5.65 c2
M-92	CuBTC	[42]	MOF	1507	n.d.	n.d.
M-93	Cu-MOF	[84]	MOF	n.d.	n.d.	n.d.
M-94	DETA-MIL-101	[96]	MOF	1560	1.1	n.d.
M-95	DMOF-Cl2	[82]	MOF	1175	0.45	3.8 c2
M-96	DMOF-NO2	[82]	MOF	1310	0.53	6.2 c2
M-97	DMOF-OH	[82]	MOF	1130	0.54	7.5 c2
M-98	DUT-10(Zn)	[18]	MOF	423	n.d.	n.d.
M-99	DUT-4	[40]	MOF	1360	0.79	8.5 c2
M-100	DUT-67	[74]	MOF	1560	0.6	16.6 c2
M-101	ED-ZIF-8	[3]	MOF	1428	0.75	45.3 c2
M-102	Et-MnCr	[111]	MOF	n.d.	n.d.	n.d.
M-103	HKUST-1-F	[11]	MOF	1404	n.d.	n.d.
M-104	JUC-110	[95]	MOF	n.d.	n.d.	4.5 c2
M-105	Lanthanum Triazolyl Phosphonate MOF	[115]	MOF	n.d.	n.d.	19 c1
M-106	Me-FeCr	[111]	MOF	n.d.	n.d.	n.d.
M-107	MFU-4	[88]	MOF	1611	0.42 b1	n.d.
M-108	Mg-CPO-27	[111]	MOF	1400	0.65	11 c1
M-109	Mg-CUK-1	[130]	MOF	580	0.28	13.4 c2
M-110	Mg-MOF-74©	[94]	MOF	1525	0.62	11 c1
M-111	MIL-100	[36]	MOF	1600	n.d.	n.d.
M-112	MIL-100(Cr)	[49]	MOF	1871	1.02	29 c1
M-113	MIL-100(Cr)-DEG	[33]	MOF	580	0.5	12 c3
M-114	MIL-100(Cr)-EG	[33]	MOF	710	0.47	12 c3
M-115	MIL-100(Cr)-EN	[33]	MOF	640	0.42	15 c3
M-116	MIL-100(Cr)-TEG	[33]	MOF	680	0.53	12 c3
M-117	MIL-100(Fe)	[40]	MOF	1549	0.82	29 c2
M-118	MIL-100V	[125]	MOF	1203	0.74	11 c1
M-119	MIL-101-NH2	[41]	MOF	2509	1.27	34 c2
M-120	MIL-101-SO3H	[41]	MOF	1920	0.94	34 c2
M-121	MIL-101V	[125]	MOF	2705	1.4	21 c1
M-122	MIL-125	[28]	MOF	1510	0.68	n.d.
M-123	MIL-125-NH2	[111]	MOF	1220	0.55	12 c2
M-124	MIL-160	[2]	MOF	1070	0.398	5 c2
M-125	MIL-163	[8]	MOF	170	n.d.	12 c2
M-126	MIL-53(Al)ht	[104]	MOF	1489	0.56	8.5 c1
M-127	MIL-53(Al)it	[104]	MOF	1031	0.72	34 c2
M-128	MIL-53(Cr)	[67]	MOF	n.d.	n.d.	n.d.
M-129	MIP-200	[129]	MOF	1000	0.4	13 c2
M-130	Mn2Cl2(BTDD)	[132]	MOF	n.d.	n.d.	22 c2
M-131	NBu4	[111]	MOF	n.d.	n.d.	n.d.
M-132	NENU-11	[68]	MOF	572	0.39	n.d.
M-133	Ni2Cl2(BTDD)	[132]	MOF	1762	n.d.	22 c2
M-134	Ni3C87H118N12O29	[55]	MOF	n.d.	0.68	16 c1
M-135	Ni-CUK-1	[130]	MOF	520	0.26	13.4 c2
M-136	Ni-DOBDC	[80]	MOF	639	0.362	11 c1
M-137	Pip-CPO-27-Ni	[99]	MOF	46.7	n.d.	n.d.
M-138	PIZOF-2	[74]	MOF	2080	0.88	17.6 c1
M-139	pretreated a-Al	[113]	MOF	n.d.	n.d.	n.d.
M-140	pretreated m-Al	[113]	MOF	n.d.	n.d.	n.d.
M-141	SIM-1	[111]	MOF	470	0.23	6 c1
M-142	S-MIL-53(Al)	[39]	MOF	n.d.	n.d.	n.d.
M-143	SNU-80	[14]	MOF	456	0.18	7 c2
M-144	TAF-1a	[16]	MOF	268.5	n.d.	4.6 c1
M-145	Ti(pyradine-2-carboxylic acid)	[11]	MOF	n.d.	n.d.	n.d.
M-146	UiO-66	[74]	MOF	1290	0.49	8.4 c2
M-147	UiO-66(Zr)-(COOH)2	[5]	MOF	415	0.21	n.d.
M-148	UiO-66(Zr4+) with high concentration stearic acid	[46]	MOF	n.d.	0.574	6.5 c3
M-149	UiO-66(Zr4+) with metal/ligand ratio 6:3	[46]	MOF	n.d.	0.45	6 c3
M-150	UiO-66-NH2	[63]	MOF	1040	0.57	6 c1
M-151	UMCM-1	[63]	MOF	6010	2.41	32 c2
M-152	untreated a-Al	[113]	MOF	n.d.	n.d.	n.d.
M-153	untreated m-Al	[113]	MOF	n.d.	n.d.	n.d.
M-154	Y-fum-fcu-MOF	[7]	MOF	691	0.28	8 c3
M-155	ZIF-8	[57]	MOF	n.d.	n.d.	n.d.
M-156	Zn(II)-MOF [Zn(HPylmDC)(DMA)]n	[123]	MOF	185.6	n.d.	4.425 c1
M-157	Zn(L)(tdca)*1.5DMF	[118]	MOF	n.d.	n.d.	6.6 c2
M-158	Zn(NDI-H)	[109]	MOF	1460	n.d.	16 c2
M-159	Zn(NDI-NHEt)	[109]	MOF	1236	n.d.	n.d.
M-160	Zn(NDI-SEt)	[111]	MOF	888	n.d.	16 c1
M-161	Zn(NDI-SO2Et)	[111]	MOF	764	n.d.	16 c1
M-162	Zn(NDI-SOEt)	[111]	MOF	927	n.d.	16 c1
M-163	Zn(NO3)2*6H2O	[12]	MOF	n.d.	0.17	17.3 c2
M-164	Zn2C14N2O8H4	[65]	MOF	312.7	0.146	5.2 c1
M-165	Zn3(TCPB)2(H2O)2	[107]	MOF	284	n.d.	4.3 c2
M-166	Zn4O(dmcapz)3	[71]	MOF	840	0.45	6 c1
M-167	Zn-BTTB-DMBPY	[83]	MOF	749	0.269	4.41 c1
M-168	Zn-MOF-74(cycle 1)	[48]	MOF	n.d.	n.d.	n.d.
M-169	Zr-MOF-801-P	[74]	MOF	990	0.45	7.4 c2
M-170	Zr-MOF-801-SC	[74]	MOF	690	0.27	7.4 c2
M-171	Zr-MOF-802	[74]	MOF	20	0.01	5.6 c1
M-172	Zr-MOF-804	[74]	MOF	1145	0.46	7.2 c2
M-173	Zr-MOF-805	[74]	MOF	1230	0.48	9.5 c2
M-174	Zr-MOF-806	[74]	MOF	2220	0.85	12.6 c2
M-175	Zr-MOF-808	[74]	MOF	2060	0.84	18.4 c1
M-176	Zr-MOF-841	[74]	MOF	1390	0.53	9.2 c1
P-1	2D ep-POP	[152]	POP	852	n.d.	4.7 c1
P-2	3D ep-POP	[152]	POP	779	n.d.	4 c1
P-3	COP-120	[151]	POP	42	0.15	n.d.
P-4	CP0P-11	[145]	POP	1320	1.13	13.3 c1
P-5	CPOP-10	[144]	POP	1110	0.76	6.3 c1
P-6	CPOP-12	[145]	POP	1180	1.05	13.3 c1
P-7	CPOP-8	[144]	POP	1610	1.71	6.3 c1
P-8	CPOP-9	[144]	POP	2440	2.06	6.3 c1
P-9	DUT-92	[149]	POP	720	1.76	n.d.
P-10	DUT-92(NH2)	[149]	POP	700	0.42	n.d.
P-11	DUT-92(NO2)	[149]	POP	500	0.44	n.d.
P-12	DUT-93	[149]	POP	320	1.02	n.d.
P-13	DUT-93(NH2)	[149]	POP	n.d.	n.d.	n.d.
P-14	DUT-93(NO2)	[149]	POP	160	0.5	n.d.
P-15	EOF-6(POP)	[153]	POP	1380	0.63	n.d.
P-16	EOF-7(POP)	[153]	POP	1083	0.51	n.d.
P-17	EOF-8(POP)	[153]	POP	540	0.26	n.d.
P-18	EOF-9(POP)	[153]	POP	602	0.3	n.d.
P-19	MOPI-I	[150]	POP	206	0.16	n.d.
P-20	MOPI-II	[150]	POP	644	0.32	n.d.
P-21	MOPI-III	[150]	POP	433	0.27	n.d.
P-22	MOPI-IV	[150]	POP	660	0.28	n.d.
P-23	MOPI-V	[150]	POP	921	0.44	n.d.
P-24	MPI-6FA	[147]	POP	781	0.53	4.8 c1
P-25	MPI-BPA	[147]	POP	677	0.39	5.3 c1
P-26	MPI-BTA	[147]	POP	490	0.53	5.3 c1
P-27	NU-POP-1	[148]	POP	950	0.32	8 c1
P-28	OFC-1	[149]	POP	780	0.54	n.d.
P-29	PSN-3	[146]	POP	865	n.d.	6 c1
P-30	Py-PP	[154]	POP	n.d.	0.71	n.d.
Z-1	CBV-901	[76]	Zeolite	n.d.	0.31	7.4 c3
Z-2	H0.34Na0.06Al0.4Si47.6O96	[21]	Zeolite	340	0.24	4 c1
Z-3	HiSiv 3000 Zeolite	[75]	Zeolite	282	0.1 b1	15.2 c1
Z-4	K6Na6Al12O48	[21]	Zeolite	756	0.57	4 c1
Z-5	MCM-41	[49]	Zeolite	882	0.63	34 c1
Z-6	NaX	[128]	Zeolite	1010	0.31	10.5 c3
Z-7	Na-ZSM-5	[49]	Zeolite	366	0.18	6 c1
Z-8	Zeolite 13X	[42]	Zeolite	n.d.	n.d.	n.d.
Z-9	Zeolite 4A	[78]	Zeolite	n.d.	n.d.	11.4 c1
Z-10	Zeolite Na-A	[120]	Zeolite	n.d.	n.d.	n.d.
Z-11	Zn2(pbc)2*Hdma*H3O*2H2O	[9]	Zeolite	213 a	n.d.	n.d.
n.d. represents "no data" . For Sa: a Langmuir surface area; no superscript represents BET surface area. For Va: b1 pore volume measured basing on H2O adosrption; b2 pore volume measured using mercury intrusion method; no superscript default is based on N2 adsorption. For Dp: c1 average pore diameter; c2 largest cavity diameter; c3 dominant pore size obtained according to pore size distribution.

## Sheet: Table S5
Table S5. Adsorption properties in high-temperature stage (HS) and low-temperature stage (LS).
Number	Adsorbent	Literature	Species	ΔWHS (kg/kg)	ΔWLS (kg/kg)	ΔadsHave (mol/kg)	αa	KHa (mol/(kg·Pa))
Carb-1	293WVA 1100 oxidized	[85]	Carbon	0.016466	0.0372697	48.8545	0.2~0.3	0.00452445
Carb-2	Activated Carbon	[94]	Carbon	0.0209487	0.0169959	49.4221	0.0~0.1	0.0057744
Carb-3	Activated Carbon AT400R1t75	[23]	Carbon	0.00124286	0.0857006	45.4865	0.5~0.6	2.79138e-05
Carb-4	Activated Carbon AT467R117t45	[23]	Carbon	0.000314646	0.0731068	45.2153	0.6~0.7	2.79616e-06
Carb-5	Activated Carbon AT600R1t30	[23]	Carbon	0.00751775	0.0962335	46.0405	0.5~0.6	0.000428057
Carb-6	Activated Carbon AT800R15t120	[23]	Carbon	0.0281135	0.103577	46.1712	0.3~0.4	0.0032899
Carb-7	Activated PVDC Carbon S850	[20]	Carbon	0.000140985	0.0298276	45.9494	0.5~0.6	1.54181e-07
Carb-8	BD-Carbon	[119]	Carbon	1.79329e-07	1.26209e-05	45.0127	0.6~0.7	1.8295e-09
Carb-9	BPL-Carbon	[119]	Carbon	6.20063e-12	3.93987e-06	45.5269	0.6~0.7	5.7547e-17
Carb-10	Carbon	[42]	Carbon	5.33898e-06	0.0288582	44.8808	0.8~0.9	3.57516e-09
Carb-11	Carbon AG5	[43]	Carbon	3.62566e-05	0.0327293	45.0843	0.6~0.7	1.10227e-07
Carb-12	Carbon AG5-H2O2	[43]	Carbon	0.00427639	0.0301666	45.4486	0.5~0.6	0.000204742
Carb-13	Carbon AG5-HClO4	[43]	Carbon	0.00105166	0.0406507	45.3748	0.5~0.6	1.92458e-05
Carb-14	Carbon AG5-HNO3	[43]	Carbon	7.92213e-05	0.0653879	45.2384	0.5~0.6	2.35139e-07
Carb-15	Carbon AG5-HNO3 (356K)	[43]	Carbon	0.0136183	0.035052	46.697	0.1~0.2	0.00181381
Carb-16	Carbon Molecular Sieve	[79]	Carbon	0.000244309	0.0264414	46.1658	0.4~0.5	3.19899e-06
Carb-17	Carbon WD	[43]	Carbon	0.000559518	0.0106326	44.5307	0.8~0.9	7.3337e-06
Carb-18	Carbon WD-H2O2	[43]	Carbon	5.78053e-06	0.0215465	44.9178	0.7~0.8	5.36481e-09
Carb-19	Carbon WD-HClO4	[43]	Carbon	1.54438e-05	0.0305256	45.0509	0.7~0.8	2.26341e-08
Carb-20	Carbon WD-HNO3 (356K)	[43]	Carbon	0.0282536	0.0141747	47.4699	0.0~0.1	0.00791687
Carb-21	Charcoal	[122]	Carbon	0.000276797	0.0359893	45.6023	0.6~0.7	1.5848e-06
Carb-22	Coal based steam activated carbon	[22]	Carbon	0.00357185	0.020837	47.5384	0.3~0.4	0.000431986
Carb-23	Coconut based steam activated carbon	[22]	Carbon	0.00272782	0.0183246	47.4423	0.3~0.4	0.000248834
Carb-24	Eucalyptus Charcoal	[38]	Carbon	0.00103651	0.0401837	46.2575	0.9~1.0	2.90131e-05
Carb-25	Eucalyptus Charcoal heated to 1273K	[38]	Carbon	0.0010736	0.0240247	45.6845	0.5~0.6	4.66749e-05
Carb-26	Holm-Oak Charcoal	[38]	Carbon	0.0083	0.0109483	46.0851	0.9~1.0	0.00174601
Carb-27	Holm-Oak Charcoal heated to 1023K	[38]	Carbon	0.000480628	0.0279629	47.4485	0.9~1.0	1.0135e-05
Carb-28	MWCNT	[121]	Carbon	0.000500684	0.000134668	47.3546	0.0~0.1	0.000594669
Carb-29	NPC E0	[25]	Carbon	0.000103649	0.000810066	44.7757	0.8~0.9	8.77819e-06
Carb-30	NPC E1	[25]	Carbon	1.46295e-06	0.00071132	44.9201	0.8~0.9	6.82688e-09
Carb-31	PCB-Carbon	[119]	Carbon	1.68929e-07	1.62861e-05	45.6719	0.4~0.5	1.5688e-09
Carb-32	Sonicated Fenton MWCNT	[121]	Carbon	0.0032926	0.00197477	47.5688	0.9~1.0	0.00295723
Carb-33	Sorbonorit 4 Activated Carbon	[75]	Carbon	0.00508894	0.0176809	45.483	0.6~0.7	0.00111171
Carb-34	Wood based phosphoric acid activated carbon	[22]	Carbon	0.0177444	0.0371859	48.8795	0.2~0.3	0.0103388
Carb-35	WVA 1100	[85]	Carbon	0.0140313	0.028291	49.0009	0.2~0.3	0.00548402
Carb-36	Xtrusorb	[85]	Carbon	0.00154314	0.00560183	48.6552	0.2~0.3	0.000178175
Carb-37	Xtrusorb oxidized	[85]	Carbon	0.00236883	0.0411328	47.5179	0.2~0.3	0.000113474
C-1	2,5-DhaTab	[135]	COF	2.66755e-05	0.00909041	44.4418	0.8~0.9	1.81177e-07
C-2	2,3-DhaTph	[135]	COF	0.0012215	0.0303428	45.9455	0.6~0.7	2.38901e-05
C-3	2,5-DhaTph	[135]	COF	0.00151144	0.00378534	44.7843	0.6~0.7	0.000482859
C-4	AB-COF	[133]	COF	0.000159444	0.292607	46.4628	0.2~0.3	1.37586e-06
C-5	AB-COF	[133]	COF	4.17339e-05	0.301043	46.9334	0.2~0.3	3.40764e-08
C-6	Ad2L1	[140]	COF	8.08243e-10	0.000776532	47.196	0.8~0.9	5.81095e-15
C-7	Ad2L2	[140]	COF	1.93832e-06	0.00570003	44.5068	0.8~0.9	2.21591e-09
C-8	Ad2L3	[140]	COF	0.000684049	0.0127707	44.9491	0.7~0.8	1.5489e-05
C-9	Ad3L1	[140]	COF	8.56599e-05	0.0168693	44.6543	0.7~0.8	4.61327e-07
C-10	Ad3L2	[140]	COF	2.09555e-09	0.00144581	46.1404	0.8~0.9	2.01925e-14
C-11	Ad3L3	[140]	COF	5.99484e-11	0.000775942	45.0382	0.7~0.8	4.17819e-17
C-12	Ad4L1	[140]	COF	0.000633302	0.0273217	45.2964	0.5~0.6	8.42909e-06
C-13	Ad4L2	[140]	COF	2.90285e-12	0.000270773	44.6776	0.8~0.9	3.43323e-19
C-14	Ad4L3	[140]	COF	0.00394214	0.0339287	45.3423	0.5~0.6	0.000168825
C-15	ATFG-COF	[133]	COF	0.00669353	0.0614922	47.0168	0.1~0.2	0.00014028
C-16	ATFG-COF	[133]	COF	0.0115538	0.0629756	46.5553	0.1~0.2	0.000679223
C-17	bipy -CTF500	[138]	COF	0.0141503	0.118064	46.6046	0.3~0.4	0.00128537
C-18	bpim -CTF -300	[142]	COF	0.00981787	0.0123622	45.6799	0.9~1.0	0.000424761
C-19	bpim -CTF -400	[142]	COF	0.0362467	0.0795771	47.3281	0.0~0.1	0.0109048
C-20	bpim -CTF -500	[142]	COF	0.0178946	0.0989488	46.0967	0.4~0.5	0.00580928
C-21	CE-1	[137]	COF	0.000641539	0.0411584	45.2471	0.7~0.8	1.31951e-05
C-22	CE-2	[137]	COF	0.00257549	0.00988941	45.9391	0.6~0.7	0.00029279
C-23	CE-3	[137]	COF	0.00127514	0.0109081	46.0129	0.6~0.7	9.73228e-05
C-24	CTF-a	[139]	COF	1.62167e-06	0.0256345	56.8902	0.6~0.7	4.45343e-10
C-25	CTF-b	[139]	COF	0.0245486	0.145693	46.6782	0.3~0.4	0.00118302
C-26	CTF-c	[139]	COF	0.000424635	0.112017	45.4366	0.5~0.6	3.27395e-06
C-27	CTF-d	[139]	COF	6.3552e-06	0.0276206	44.4959	0.8~0.9	2.62988e-09
C-28	DCBP -CTF - 1	[143]	COF	5.22293e-05	0.0239902	44.5595	0.8~0.9	2.51666e-07
C-29	F -DCBP -CTF - 1	[143]	COF	0.000308714	0.0113452	44.8565	0.8~0.9	4.50052e-06
C-30	MM1	[141]	COF	1.89467e-05	0.0320572	45.1004	0.7~0.8	3.04271e-08
C-31	MM2	[141]	COF	0.0133355	0.0903778	46.294	0.3~0.4	0.00208774
C-32	MM3	[141]	COF	4.82538e-07	0.0118715	49.2211	0.8~0.9	7.96271e-11
C-33	MM4	[141]	COF	0.00378757	0.0295707	45.5341	0.5~0.6	0.000189686
C-34	pym -CTF500	[138]	COF	0.0617154	0.0240395	48.0918	0.0~0.1	0.055524
C-35	TpAnq	[136]	COF	0.000743408	0.0829924	45.7788	0.3~0.4	1.54462e-05
C-36	Tp-Azo	[135]	COF	0.000455576	0.0242224	45.2301	0.5~0.6	8.55425e-06
C-37	Tp-Azo	[136]	COF	1.09603e-07	0.00854685	44.9242	0.5~0.6	7.31477e-12
C-38	TpBD	[135]	COF	0.000811522	0.0172937	45.757	0.4~0.5	4.34154e-05
C-39	TpBD	[136]	COF	3.90296e-05	0.0299827	45.2818	0.4~0.5	1.51082e-07
C-40	TpBD-(NO2)2	[135]	COF	0.000983816	0.0106473	45.4482	0.5~0.6	8.42171e-05
C-41	TpBD-(NO2)2	[136]	COF	0.000396939	0.0472687	45.5106	0.3~0.4	5.69425e-06
C-42	TpBD-(OMe)2	[135]	COF	0.00226649	0.00911012	45.911	0.5~0.6	0.000231671
C-43	TpBD-(OMe)2	[136]	COF	0.00181412	0.0172197	45.2606	0.5~0.6	3.77706e-07
C-44	TpBD-Me2	[135]	COF	0.00226649	0.00911012	45.911	0.5~0.6	0.000231671
C-45	TpBD-Me2	[136]	COF	2.62854e-06	0.0182822	45.1665	0.5~0.6	1.46562e-09
C-46	TpBpy	[136]	COF	2.00673e-05	0.0410053	45.5568	0.4~0.5	3.30392e-08
C-47	TpPa-1	[135]	COF	0.00663268	0.245965	46.8856	0.1~0.2	0.000415314
C-48	TpPa-1	[136]	COF	0.000232991	0.190998	45.8721	0.2~0.3	1.20975e-07
C-49	TpPa-2	[135]	COF	0.00144862	0.0759098	45.9322	0.3~0.4	4.86988e-05
C-50	TpPa-2	[136]	COF	0.000654147	0.112425	46.1847	0.2~0.3	3.20675e-06
C-51	TpPa-F4	[135]	COF	7.99851e-05	0.00841164	45.0612	0.6~0.7	1.22425e-06
C-52	TpPa-NO2	[135]	COF	7.99851e-05	0.00841164	45.0612	0.6~0.7	1.22425e-06
C-53	TpPa-NO2	[136]	COF	0.00184374	0.128126	46.3526	0.1~0.2	6.4081e-06
C-54	TpTph	[136]	COF	0.00109815	0.0110121	44.8967	0.6~0.7	0.000110764
C-55	TpTta	[136]	COF	0.000749701	0.0826568	45.4737	0.7~0.8	6.6263e-06
C-56	trzn-COF	[134]	COF	0.00372101	0.0101247	46.009	0.6~0.7	0.00047602
C-57	trzn-COF	[134]	COF	0.00335873	0.00540029	46.7091	0.0~0.1	0.00058518
M-1	(H2dab)[Zn2(ox)3]	[70]	MOF	0.0492859	0.00271315	47.096	0.7~0.8	0.0409811
M-2	[{Zn(L)(H2O)2}(NO3)2*2H2O]n	[4]	MOF	0.00164992	0.00717468	45.6465	0.4~0.5	5.70027e-05
M-3	[Cd(mpto)2.CH3CH2OH]n	[24]	MOF	0.000223481	0.00010856	45.742	0.5~0.6	0.000492516
M-4	[Co2(BDC)2(BPNO)]*H2BDC*2MeOH	[19]	MOF	0.0326639	0.0124307	48.2024	0.0~0.1	0.03689
M-5	[Co3(ndc)-(HCOO)3(mu3-OH)(H2O)]n	[15]	MOF	0.0161234	0.0865803	47.7055	0.1~0.2	0.00163789
M-6	[Cu(INA)2(NH3)2(H2O)2]	[35]	MOF	0.000984806	0.00317684	45.9798	0.7~0.8	0.000111948
M-7	[Cu(INA)2]	[35]	MOF	0.00512821	0.00871104	46.5615	0.5~0.6	0.000979566
M-8	[Cu(INAIP)]*2H2O	[92]	MOF	0.0314185	0.00743389	50.4923	0.0~0.1	0.0090401
M-9	[Cu2(H2btp)(H2O)2(12-bis(4-pyridl)ethylene)]	[114]	MOF	0.0177369	0.0168917	48.0579	0.0~0.1	0.00315706
M-10	[Cu2(H2btp)(H2O)2(13-bis(4-pyridl)propane)]	[114]	MOF	0.0138688	0.0151437	48.4135	0.0~0.1	0.00243071
M-11	[Cu2(H2btp)(H2O)2(bipyridine)]	[114]	MOF	0.00687012	0.0126016	48.0733	0.0~0.1	0.00113532
M-12	[Cu2(pzdc)2(pyz)]*2H2O}	[30]	MOF	0.0464287	0.0152971	47.0048	0.0~0.1	0.0133112
M-13	[Mn(mpto)2.CH3CH2OH]2	[24]	MOF	5.42605e-06	0.00763177	45.6875	0.5~0.6	9.49639e-09
M-14	[Ni(dipn)]2[Ni(dipn)(H2O)][Fe(CN)6]2.2H2O	[66]	MOF	0.0316848	0.0182301	46.9291	0.0~0.1	0.00890374
M-15	[Ni(pca)(bdc)0.5(H2O)2]	[58]	MOF	0.0179026	0.0188378	46.5463	0.0~0.1	0.00522295
M-16	[Ni8(L5)6]	[6]	MOF	0.00627363	0.0205343	44.6282	0.7~0.8	0.00171608
M-17	[Ni8(L5-CF3)6]	[6]	MOF	0.00127783	0.0177633	44.4267	0.8~0.9	6.60541e-05
M-18	[Ni8(L5-CH3)6]	[106]	MOF	0.00013206	0.0221312	44.6969	0.6~0.7	1.80652e-06
M-19	[PbL2]*2DMF*6H2O	[98]	MOF	0.0104045	0.0163716	45.4869	0.8~0.9	0.00221426
M-20	[PbL2]*DMF*2H2O	[98]	MOF	0.0257895	0.00429827	49.2875	0.0~0.1	0.000604091
M-21	[Zn(NO2-BDC)(dmbpy).5](C2H6O)(H2O)	[47]	MOF	0.000289452	0.0197898	45.3509	0.4~0.5	9.89153e-06
M-22	[Zn2(ip)2(bpy)2]*DMF}n	[87]	MOF	0.00416544	0.0248828	47.957	0.2~0.3	0.000770277
M-23	[Zn3(TCPB)2*2H2O]*2H2O*4DMF	[10]	MOF	0.00147101	0.0181059	46.8998	0.1~0.2	7.27827e-05
M-24	[Zn4O(mipcapz)3]n on [Zn4O(dmcapz)3]n	[1]	MOF	5.71171e-06	0.0100667	44.6394	0.7~0.8	6.80617e-09
M-25	{(H2PIP)0.5[VO(CEP)]*H2O}	[56]	MOF	0.000140818	0.0435993	46.9216	0.2~0.3	1.51041e-06
M-26	{[Cu(azpy)(glut)](H2O)2}	[50]	MOF	0.000512989	0.109435	46.603	0.2~0.3	1.21997e-05
M-27	{[Cu2(4-pmpmd)2(CH3OH)4(opd)2]*2H2O}	[52]	MOF	4.27122e-06	0.0555891	45.4239	0.3~0.4	9.24025e-10
M-28	{[Cu2(pzdc)2(bpy)]*4H2O}	[30]	MOF	0.0919499	0.0168525	51.489	0.0~0.1	0.0184521
M-29	{[Cu4(OH)2(tci)2-(bpy)2]·11H2O}	[127]	MOF	0.00343304	0.0182607	47.109	0.1~0.2	0.000180398
M-30	{[Dy(ox)(Bpybc)(H2O)]*OH*13H2O}n	[102]	MOF	0.0121846	0.0330015	46.4646	0.6~0.7	0.00135852
M-31	{[Ni(bpe)2(N(CN)2)](N(CN)2)}n	[86]	MOF	0.00798932	0.0113382	46.8332	0.0~0.1	0.00159789
M-32	{[Zn-(C10H2O8)0.5(C10S2N2H8)]*5H2O]}n	[60]	MOF	0.0284057	0.00290504	48.5103	0.0~0.1	3.83014e-06
M-33	{[Zn(oxo-pba)2(bpy)]4H2O}n	[116]	MOF	0.0065631	0.00526006	46.0035	0.7~0.8	0.00205285
M-34	{[Zn2(bpdc)2(azpy)]*2H2O*2DMF}n	[61]	MOF	0.00382303	0.00707884	45.9827	0.6~0.7	0.000545959
M-35	{[Zn2(bpdc)2(azpy)]*2H2O*2DMF}n Nanoscale	[61]	MOF	0.0106844	0.0117766	46.7409	0.0~0.1	0.00254933
M-36	{[Zn3(bpdc)3(azpy)]*4H2O*2DEF}n	[61]	MOF	0.00666454	0.015688	46.0301	0.8~0.9	0.00114302
M-37	{[Zn4O(bfbpdc)3-(bpy)0.5(H2O)]*(3DMF)(H2O)}n	[59]	MOF	5.03751e-15	4.00463e-06	44.3217	0.8~0.9	8.67648e-23
M-38	{[ZnL(HCO2)(H2O)]*DMF}	[108]	MOF	0.0242251	0.0389512	45.7607	0.4~0.5	0.0189219
M-39	1 C76H116N14O42Zn3	[117]	MOF	0.0180275	0.0244768	46.7085	0.0~0.1	0.00357859
M-40	1-LiCl	[111]	MOF	0.000340864	0.0694246	44.2824	0.1~0.2	1.00764e-06
M-41	2D [Cu(bpy)2(OTf)2]n	[69]	MOF	0.0057976	0.0275444	47.5956	0.8~0.9	0.00538173
M-42	Aluminum fumarate	[126]	MOF	0.0356918	0.1001	48.4378	0.1~0.2	0.011691
M-43	Blucher-101408	[106]	MOF	3.16737e-17	7.44368e-06	44.5406	0.7~0.8	3.26826e-27
M-44	Bu-FeCr	[111]	MOF	0.00257339	0.0056403	46.1759	0.7~0.8	0.000379804
M-45	C10H4O12Eu2	[90]	MOF	0.0246975	0.0244664	48.6974	0.0~0.1	0.00993032
M-46	C115.5H202N14O43Zn4	[91]	MOF	0.00396482	0.0130259	46.64	0.1~0.2	0.000166867
M-47	C11H15BrN2O4Zn	[72]	MOF	0.0110605	0.00643944	48.1774	0.0~0.1	0.00402065
M-48	C11H15ClN2O4Zn	[72]	MOF	0.0034853	0.0150309	46.3761	0.4~0.5	0.000419128
M-49	C12H17ClN2O3Cd	[51]	MOF	9.50696e-07	0.00517689	43.2361	0.8~0.9	6.28804e-10
M-50	C15H27N2O10Dy	[53]	MOF	0.019617	0.0227611	49.4441	0.0~0.1	0.00569438
M-51	C15H27N2O10Er	[53]	MOF	0.0100062	0.0325602	50.3453	0.1~0.2	0.0112688
M-52	C15H27N2O10Ho	[53]	MOF	0.0186924	0.0214639	49.9159	0.0~0.1	0.00799736
M-53	C15H27N2O10Tb	[53]	MOF	0.0364341	0.013584	50.3568	0.0~0.1	0.00509924
M-54	C15H27N2O10Tm	[53]	MOF	0.0103839	0.0405838	48.2328	0.1~0.2	0.000694732
M-55	C18H21Br2N4O9Cd2	[51]	MOF	0.00422227	0.00437241	47.037	0.0~0.1	0.000907659
M-56	C24H40N2O16Cl2Cd3	[37]	MOF	0.0257553	0.0102774	48.9814	0.0~0.1	0.00673341
M-57	C26H24Br2Cu2N8O3	[101]	MOF	0.0544106	0.0021574	51.2509	0.0~0.1	0.0320499
M-58	C28H24CoN10	[93]	MOF	0.00756716	0.00744917	46.0933	0.8~0.9	0.00266351
M-59	C32H24Cu3N6O12	[13]	MOF	0.0312525	0.0265786	48.6661	0.1~0.2	0.0223849
M-60	C32H46N4O8Zn	[100]	MOF	0.000301103	0.00077214	46.3265	0.6~0.7	2.82466e-05
M-61	C4H8HoKO12 Dehydrated	[54]	MOF	0.139093	0.00635483	52.3823	0.0~0.1	0.0396599
M-62	C55H52Fe4N20O18	[32]	MOF	0.0509859	0.0121796	49.6559	0.0~0.1	0.0107065
M-63	C62H44N2O8Zn2	[57]	MOF	0.000645287	0.0296116	47.865	0.9~1.0	1.84079e-05
M-64	C62H50Cd3K2N2O26	[105]	MOF	0.0110899	0.0375046	47.4579	0.0~0.1	0.000904997
M-65	C9H11ClN2O4Cd	[51]	MOF	0.0123072	0.0150927	48.9685	0.0~0.1	0.00270915
M-66	CALF-25	[73]	MOF	0.00282174	0.00711505	45.7384	0.7~0.8	0.000377244
M-67	CAU-10-CH3	[111]	MOF	0.00951823	0.0103088	46.0445	0.4~0.5	0.00230102
M-68	CAU-10-H	[111]	MOF	0.00434557	0.176393	58.2042	0.1~0.2	0.00029647
M-69	CAU-10-NH2	[111]	MOF	0.057517	0.06114	49.2066	0.0~0.1	0.0369257
M-70	CAU-10-NO2	[111]	MOF	5.00304e-05	0.0936358	46.5116	0.3~0.4	5.73267e-08
M-71	CAU-10-OCH3	[111]	MOF	0.00176453	0.0708262	47.0388	0.2~0.3	0.000155968
M-72	CAU-10-OH	[111]	MOF	0.0185163	0.0603085	47.9379	0.1~0.2	0.00360174
M-73	CAU-10-pydc	[2]	MOF	0.0914113	0.047212	49.5655	0.0~0.1	0.0257828
M-74	CAU-13	[62]	MOF	0.00396675	0.0881247	47.0521	0.2~0.3	0.00051307
M-75	CAU-1-NH2	[97]	MOF	0.00481927	0.0184718	45.9112	0.4~0.5	0.000330482
M-76	CAU-1-NHCH3	[97]	MOF	0.01803	0.0793954	46.0288	0.3~0.4	0.0180759
M-77	CAU-1-NHCOCH3	[97]	MOF	0.022331	0.087233	47.3877	0.2~0.3	0.0221651
M-78	CAU-23	[131]	MOF	0.00188376	0.342891	46.804	0.2~0.3	0.000124458
M-79	Cd (II)-MOF [Cd(L)(DMF)]	[112]	MOF	0.0452145	0.0263152	48.9273	0.0~0.1	0.0141969
M-80	CID-3	[89]	MOF	3.24412e-06	0.00601264	45.3023	0.5~0.6	5.52258e-09
M-81	Co2Cl2(BTDD)	[132]	MOF	0.0560123	0.748047	47.2515	0.2~0.3	0.015395
M-82	Cobalt Triazolyl Phosphonate MOF	[115]	MOF	0.021671	0.0196781	49.2206	0.0~0.1	0.00606058
M-83	Cobalt Triazolyl Phosphonate MOF (95%RH)	[115]	MOF	0.0144044	0.0178695	50.0031	0.0~0.1	0.0416533
M-84	Cobalt Triazolyl Phosphonate MOF (Activated at 403K)	[115]	MOF	0.025567	0.0479669	46.7242	0.0~0.1	0.00218626
M-85	Co-CUK-1	[130]	MOF	0.00462807	0.017851	48.709	0.1~0.2	0.000493303
M-86	Co-MOF-74(M)	[27]	MOF	0.385315	0.0244541	51.5605	0.0~0.1	0.180107
M-87	Co-MOF-74(S)	[27]	MOF	0.488344	0.0200433	51.4804	0.0~0.1	0.152756
M-88	CPO-27-Ni	[99]	MOF	0.319248	0.0254755	50.1086	0.0~0.1	0.394584
M-89	Cr-MIL(101)	[111]	MOF	0.0024912	0.0504883	46.0004	0.4~0.5	5.98929e-06
M-90	Cr-MIL-101-NO2	[111]	MOF	0.0188472	0.0260022	45.666	0.4~0.5	0.00701802
M-91	Cu6(Trz)10(H2O)4[H2SiW12O40]·8H2O	[124]	MOF	0.00179938	0.0222307	46.0555	0.8~0.9	6.87454e-05
M-92	CuBTC	[42]	MOF	0.161661	0.0785535	47.7359	0.0~0.1	0.0118579
M-93	Cu-MOF	[84]	MOF	0.020994	0.000986581	54.347	0.0~0.1	0.0885073
M-94	DETA-MIL-101	[96]	MOF	0.0233099	0.00670031	47.7395	0.0~0.1	0.018287
M-95	DMOF-Cl2	[82]	MOF	0.000531168	0.00827506	46.0197	0.3~0.4	2.96874e-05
M-96	DMOF-NO2	[82]	MOF	0.0194338	0.00570842	47.2527	0.4~0.5	0.0119781
M-97	DMOF-OH	[82]	MOF	0.00294382	0.0169806	46.8704	0.1~0.2	0.000227345
M-98	DUT-10(Zn)	[18]	MOF	4.82564e-06	0.0187571	44.4811	0.9~1.0	3.90641e-09
M-99	DUT-4	[40]	MOF	0.00224976	0.00736265	44.8861	0.9~1.0	0.000682485
M-100	DUT-67	[74]	MOF	0.0435194	0.251863	47.5693	0.2~0.3	0.00244962
M-101	ED-ZIF-8	[3]	MOF	3.10552e-05	0.000891702	46.6643	0.4~0.5	3.96789e-07
M-102	Et-MnCr	[111]	MOF	0.000895987	0.0536588	46.3956	0.2~0.3	4.95251e-05
M-103	HKUST-1-F	[11]	MOF	0.110233	0.0381005	45.6519	0.9~1.0	0.0419564
M-104	JUC-110	[95]	MOF	0.0246975	0.0244664	48.6974	0.0~0.1	0.00993032
M-105	Lanthanum Triazolyl Phosphonate MOF	[115]	MOF	0.0247148	0.198322	47.288	0.2~0.3	0.0157501
M-106	Me-FeCr	[111]	MOF	0.00860872	0.0253588	46.1855	0.5~0.6	0.00397694
M-107	MFU-4	[88]	MOF	0.00781185	0.224138	47.4635	0.1~0.2	0.000896972
M-108	Mg-CPO-27	[111]	MOF	0.137413	0.0331552	54.9836	0.0~0.1	0.679565
M-109	Mg-CUK-1	[130]	MOF	0.000104511	0.290272	47.0358	0.2~0.3	4.19246e-07
M-110	Mg-MOF-74©	[94]	MOF	0.252886	0.0555277	50.2511	0.0~0.1	0.414954
M-111	MIL-100	[36]	MOF	0.0180635	0.181994	47.036	0.2~0.3	0.0106292
M-112	MIL-100(Cr)	[49]	MOF	0.0384442	0.0431511	45.6478	0.6~0.7	0.0130584
M-113	MIL-100(Cr)-DEG	[33]	MOF	0.0103329	0.125197	46.3355	0.9~1.0	0.00190031
M-114	MIL-100(Cr)-EG	[33]	MOF	0.0240315	0.0992256	46.5471	0.3~0.4	0.0130215
M-115	MIL-100(Cr)-EN	[33]	MOF	0.0214262	0.126126	46.68	0.2~0.3	0.00740227
M-116	MIL-100(Cr)-TEG	[33]	MOF	0.0146936	0.0960884	46.4746	0.3~0.4	0.00382186
M-117	MIL-100(Fe)	[40]	MOF	0.0734066	0.246548	46.8104	0.3~0.4	0.000567873
M-118	MIL-100V	[125]	MOF	0.0303691	0.0208813	48.1141	0.0~0.1	0.00938456
M-119	MIL-101-NH2	[41]	MOF	0.00179062	0.0687086	45.6464	0.3~0.4	7.10323e-05
M-120	MIL-101-SO3H	[41]	MOF	0.0560768	0.264699	46.9656	0.3~0.4	0.0463463
M-121	MIL-101V	[125]	MOF	0.0588212	0.0414203	47.4706	0.0~0.1	0.0286455
M-122	MIL-125	[28]	MOF	0.000388727	0.0338251	45.01	0.3~0.4	1.53367e-05
M-123	MIL-125-NH2	[111]	MOF	0.0153556	0.206101	48.0501	0.1~0.2	0.000917395
M-124	MIL-160	[2]	MOF	0.0722447	0.0320797	49.7146	0.0~0.1	0.0156428
M-125	MIL-163	[8]	MOF	0.024338	0.0426124	45.6243	0.5~0.6	0.00776851
M-126	MIL-53(Al)ht	[104]	MOF	0.000788861	0.0111395	48.7308	0.1~0.2	1.85445e-07
M-127	MIL-53(Al)it	[104]	MOF	0.000931348	0.0230075	45.5582	0.6~0.7	4.35144e-05
M-128	MIL-53(Cr)	[67]	MOF	0.000681234	0.0162339	43.3934	0.9~1.0	1.61767e-07
M-129	MIP-200	[129]	MOF	0.0778941	0.180503	48.6732	0.1~0.2	0.115184
M-130	Mn2Cl2(BTDD)	[132]	MOF	0.0507321	0.0536883	47.1387	0.0~0.1	0.0129638
M-131	NBu4	[111]	MOF	0.000914585	0.00138366	46.2235	0.0~0.1	0.000217235
M-132	NENU-11	[68]	MOF	0.00337032	0.00470583	49.2167	0.1~0.2	0.000388708
M-133	Ni2Cl2(BTDD)	[132]	MOF	0.0506061	0.537073	47.1764	0.3~0.4	0.0159113
M-134	Ni3C87H118N12O29	[55]	MOF	0.0120146	0.0383933	46.0685	0.1~0.2	0.00102948
M-135	Ni-CUK-1	[130]	MOF	0.00333537	0.0184801	48.4592	0.1~0.2	0.000413256
M-136	Ni-DOBDC	[80]	MOF	0.377115	0.0279433	48.3042	0.0~0.1	0.074065
M-137	Pip-CPO-27-Ni	[99]	MOF	0.0886525	0.0189291	50.3936	0.0~0.1	0.241241
M-138	PIZOF-2	[74]	MOF	1.94485e-48	3.54465e-15	44.3544	0.7~0.8	4.06692e-78
M-139	pretreated a-Al	[113]	MOF	0.000604128	0.0012311	47.8929	0.1~0.2	0.000222216
M-140	pretreated m-Al	[113]	MOF	0.000897229	0.00430574	47.8406	0.1~0.2	0.000130573
M-141	SIM-1	[111]	MOF	0.00233471	0.0540847	47.0539	0.2~0.3	0.00284512
M-142	S-MIL-53(Al)	[39]	MOF	1.64537e-13	0.0184493	44.8965	0.8~0.9	3.21661e-23
M-143	SNU-80	[14]	MOF	0.00101764	0.00130755	47.0255	0.0~0.1	0.00011358
M-144	TAF-1a	[16]	MOF	0.0020902	0.00274626	47.7794	0.0~0.1	0.000882705
M-145	Ti(pyradine-2-carboxylic acid)	[11]	MOF	0.00338596	0.0324494	46.6366	0.1~0.2	6.78507e-05
M-146	UiO-66	[74]	MOF	0.00566475	0.113664	46.6541	0.3~0.4	0.00193544
M-147	UiO-66(Zr)-(COOH)2	[5]	MOF	0.030491	0.0399335	47.0439	0.0~0.1	0.00641092
M-148	UiO-66(Zr4+) with high concentration stearic acid	[46]	MOF	0.0524215	0.304202	47.4881	0.3~0.4	0.0151412
M-149	UiO-66(Zr4+) with metal/ligand ratio 6:3	[46]	MOF	0.0464546	0.264923	47.4923	0.3~0.4	0.01509
M-150	UiO-66-NH2	[63]	MOF	0.0556322	0.12428	48.7566	0.1~0.2	0.0183941
M-151	UMCM-1	[63]	MOF	0.0088439	0.0321441	45.8262	0.7~0.8	0.00216132
M-152	untreated a-Al	[113]	MOF	0.00114015	0.00110106	48.9434	0.0~0.1	0.000700427
M-153	untreated m-Al	[113]	MOF	0.000262447	0.0013264	47.4593	0.1~0.2	3.14608e-05
M-154	Y-fum-fcu-MOF	[7]	MOF	0.0170418	0.0654106	48.8782	0.0~0.1	0.00117822
M-155	ZIF-8	[57]	MOF	5.13722e-48	4.29173e-13	44.142	0.9~1.0	3.4401e-79
M-156	Zn(II)-MOF [Zn(HPylmDC)(DMA)]n	[123]	MOF	0.0176447	0.0106764	48.0495	0.0~0.1	0.0168439
M-157	Zn(L)(tdca)*1.5DMF	[118]	MOF	0.0101366	0.0164584	49.3631	0.0~0.1	0.00450376
M-158	Zn(NDI-H)	[109]	MOF	8.6752e-05	0.0207383	45.6778	0.4~0.5	6.86408e-07
M-159	Zn(NDI-NHEt)	[109]	MOF	9.15861e-05	0.0302392	45.7553	0.4~0.5	5.61503e-07
M-160	Zn(NDI-SEt)	[111]	MOF	0.0273036	0.0979387	47.1397	0.2~0.3	0.00451681
M-161	Zn(NDI-SO2Et)	[111]	MOF	0.0026171	0.0786136	46.5268	0.3~0.4	0.000133209
M-162	Zn(NDI-SOEt)	[111]	MOF	0.0273036	0.0979387	47.1397	0.2~0.3	0.00451681
M-163	Zn(NO3)2*6H2O	[12]	MOF	0.059922	0.0183774	50.0653	0.0~0.1	0.0097811
M-164	Zn2C14N2O8H4	[65]	MOF	0.00307787	0.0559593	47.5217	0.1~0.2	0.00391721
M-165	Zn3(TCPB)2(H2O)2	[107]	MOF	0.00419152	0.0125462	45.8093	0.8~0.9	0.000488747
M-166	Zn4O(dmcapz)3	[71]	MOF	5.63265e-11	0.00014951	44.601	0.8~0.9	1.63316e-16
M-167	Zn-BTTB-DMBPY	[83]	MOF	0.00013785	0.00437225	44.3615	0.8~0.9	4.2692e-06
M-168	Zn-MOF-74(cycle 1)	[48]	MOF	0.136064	0.0329849	49.7423	0.0~0.1	0.172126
M-169	Zr-MOF-801-P	[74]	MOF	0.0278482	0.0458646	49.213	0.0~0.1	0.00293927
M-170	Zr-MOF-801-SC	[74]	MOF	0.00233704	0.0570744	48.4963	0.0~0.1	5.2575e-05
M-171	Zr-MOF-802	[74]	MOF	0.0186072	0.0180334	48.2463	0.0~0.1	0.00409785
M-172	Zr-MOF-804	[74]	MOF	0.0118949	0.0333193	46.4001	0.4~0.5	0.0221326
M-173	Zr-MOF-805	[74]	MOF	0.00553428	0.152945	46.6928	0.3~0.4	0.00042152
M-174	Zr-MOF-806	[74]	MOF	0.0839312	0.0592705	49.3163	0.0~0.1	0.0159818
M-175	Zr-MOF-808	[74]	MOF	0.0260226	0.395146	46.681	0.3~0.4	0.019667
M-176	Zr-MOF-841	[74]	MOF	0.000227266	0.405178	47.0273	0.2~0.3	6.55095e-07
P-1	2D ep-POP	[152]	POP	0.000789108	0.127865	45.4833	0.7~0.8	7.80847e-06
P-2	3D ep-POP	[152]	POP	0.0114753	0.130213	45.8234	0.1~0.2	0.000370067
P-3	COP-120	[151]	POP	0.0194479	0.021243	45.4892	0.7~0.8	0.00318986
P-4	CP0P-11	[145]	POP	1.44003e-05	0.00377657	44.6822	0.9~1.0	1.11161e-07
P-5	CPOP-10	[144]	POP	6.97955e-05	0.00822417	44.2624	0.9~1.0	7.9646e-07
P-6	CPOP-12	[145]	POP	8.09049e-08	0.00353158	44.7898	0.8~0.9	8.54657e-12
P-7	CPOP-8	[144]	POP	1.60151e-05	0.00862165	44.3028	0.8~0.9	6.05309e-08
P-8	CPOP-9	[144]	POP	0.0167874	0.00340107	44.5789	0.8~0.9	0.0020741
P-9	DUT-92	[149]	POP	6.0649e-05	0.00418762	44.4857	0.9~1.0	1.27518e-06
P-10	DUT-92(NH2)	[149]	POP	0.000123294	0.054407	45.3755	0.7~0.8	4.74025e-07
P-11	DUT-92(NO2)	[149]	POP	1.21875e-08	0.00428384	43.276	0.9~1.0	1.91583e-13
P-12	DUT-93	[149]	POP	0.000331123	0.0833106	44.8672	0.7~0.8	2.91578e-06
P-13	DUT-93(NH2)	[149]	POP	0.00345722	0.0311251	45.6658	0.7~0.8	0.000225036
P-14	DUT-93(NO2)	[149]	POP	2.92099e-05	0.0114445	44.2552	0.9~1.0	1.36827e-07
P-15	EOF-6(POP)	[153]	POP	0.000675877	0.00285544	44.3174	0.8~0.9	4.68475e-05
P-16	EOF-7(POP)	[153]	POP	3.72881e-06	0.00376608	44.4901	0.8~0.9	9.22933e-09
P-17	EOF-8(POP)	[153]	POP	1.1876e-05	0.00434649	44.3945	0.8~0.9	6.83368e-08
P-18	EOF-9(POP)	[153]	POP	1.31939e-05	0.00447987	44.3905	0.8~0.9	7.88336e-08
P-19	MOPI-I	[150]	POP	0.0057126	0.0401013	46.1557	0.6~0.7	0.00034356
P-20	MOPI-II	[150]	POP	0.000280956	0.0483887	45.4568	0.7~0.8	2.68442e-06
P-21	MOPI-III	[150]	POP	0.00352204	0.0264938	46.3106	0.5~0.6	0.000201859
P-22	MOPI-IV	[150]	POP	0.00436383	0.0789656	46.0542	0.7~0.8	0.00016771
P-23	MOPI-V	[150]	POP	0.000398372	0.0174743	45.3977	0.6~0.7	1.15752e-05
P-24	MPI-6FA	[147]	POP	3.61397e-05	0.00929122	45.3333	0.7~0.8	1.48636e-07
P-25	MPI-BPA	[147]	POP	3.46098e-05	0.0141861	45.4526	0.5~0.6	1.87102e-07
P-26	MPI-BTA	[147]	POP	9.62465e-05	0.02072	45.8844	0.5~0.6	7.44226e-07
P-27	NU-POP-1	[148]	POP	0.00114798	0.0521387	46.0426	0.1~0.2	1.26014e-05
P-28	OFC-1	[149]	POP	3.42346e-05	0.00776907	44.5251	0.9~1.0	3.01006e-07
P-29	PSN-3	[146]	POP	0.000222726	0.00842794	45.7109	0.6~0.7	3.06129e-06
P-30	Py-PP	[154]	POP	0.00069165	0.00108063	45.4683	0.8~0.9	1.90091e-05
Z-1	CBV-901	[76]	Zeolite	4.15055e-06	4.59384e-06	49.6741	0.0~0.1	1.84014e-06
Z-2	H0.34Na0.06Al0.4Si47.6O96	[21]	Zeolite	0.00643725	0.0279072	47.0041	0.1~0.2	0.000195768
Z-3	HiSiv 3000 Zeolite	[75]	Zeolite	0.00736418	0.00820232	48.4949	0.0~0.1	0.00690162
Z-4	K6Na6Al12O48	[21]	Zeolite	0.149553	0.00609677	52.7984	0.0~0.1	0.346989
Z-5	MCM-41	[49]	Zeolite	0.00278048	0.036187	44.9753	0.7~0.8	0.000187318
Z-6	NaX	[128]	Zeolite	0.142062	0.0150651	52.7542	0.0~0.1	0.401173
Z-7	Na-ZSM-5	[49]	Zeolite	0.130645	0.03202	50.6095	0.0~0.1	0.160959
Z-8	Zeolite 13X	[42]	Zeolite	0.0213118	0.0208058	49.3066	0.0~0.1	0.00518521
Z-9	Zeolite 4A	[78]	Zeolite	0.106659	0.0137899	51.8839	0.0~0.1	0.264058
Z-10	Zeolite Na-A	[120]	Zeolite	0.188177	0.0105351	49.197	0.0~0.1	0.0122488
Z-11	Zn2(pbc)2*Hdma*H3O*2H2O	[9]	Zeolite	0.0275034	0.0263202	49.1331	0.0~0.1	0.00539302
a Calculated according to adsorption isotherms at 298 K.

## Sheet: Table S6
Table S6. Cooling performance of adsorbent/water working pairs in cascaded adsorption chillers (two-stage, TS).
Number in HS	Adsorbent in HS	Specie in HS	Number in LS	Adsorbent in LS	Specie in LS	COPC,TS	SCETS(kJ/kg)
M-136	Ni-DOBDC	MOF	M-175	Zr-MOF-808	MOF	1.65724	929.374
M-136	Ni-DOBDC	MOF	M-81	Co2Cl2(BTDD)	MOF	1.65425	1224.92
M-136	Ni-DOBDC	MOF	C-4	AB-COF	COF	1.6523	788.186
M-136	Ni-DOBDC	MOF	M-78	CAU-23	MOF	1.65179	862.189
M-136	Ni-DOBDC	MOF	M-133	Ni2Cl2(BTDD)	MOF	1.65071	1074.2
M-136	Ni-DOBDC	MOF	M-176	Zr-MOF-841	MOF	1.65035	941.181
M-136	Ni-DOBDC	MOF	C-5	AB-COF	COF	1.64542	801.684
M-136	Ni-DOBDC	MOF	M-109	Mg-CUK-1	MOF	1.64136	785.139
M-136	Ni-DOBDC	MOF	C-48	TpPa-1	COF	1.63373	603.174
M-136	Ni-DOBDC	MOF	C-47	TpPa-1	COF	1.6276	711.606
M-136	Ni-DOBDC	MOF	M-117	MIL-100(Fe)	MOF	1.62623	712.771
M-87	Co-MOF-74(S)	MOF	M-175	Zr-MOF-808	MOF	1.62607	1043.29
M-87	Co-MOF-74(S)	MOF	M-81	Co2Cl2(BTDD)	MOF	1.62307	1441.58
M-136	Ni-DOBDC	MOF	P-1	2D ep-POP	POP	1.62221	453.243
M-136	Ni-DOBDC	MOF	M-120	MIL-101-SO3H	MOF	1.62151	744.727
M-87	Co-MOF-74(S)	MOF	C-4	AB-COF	COF	1.62112	866.105
M-136	Ni-DOBDC	MOF	M-148	UiO-66(Zr4+) with high concentration stearic acid	MOF	1.62092	807.759
M-87	Co-MOF-74(S)	MOF	M-78	CAU-23	MOF	1.62061	958.253
M-87	Co-MOF-74(S)	MOF	M-133	Ni2Cl2(BTDD)	MOF	1.61953	1234.31
M-136	Ni-DOBDC	MOF	M-149	UiO-66(Zr4+) with metal/ligand ratio 6:3	MOF	1.6195	745.262
M-87	Co-MOF-74(S)	MOF	M-176	Zr-MOF-841	MOF	1.61917	1059.05
M-136	Ni-DOBDC	MOF	C-26	CTF-c	COF	1.61587	410.229
M-136	Ni-DOBDC	MOF	M-100	DUT-67	MOF	1.61505	723.165
M-136	Ni-DOBDC	MOF	M-105	Lanthanum Triazolyl Phosphonate MOF	MOF	1.61463	620.865
M-136	Ni-DOBDC	MOF	M-111	MIL-100	MOF	1.61459	585.883
M-136	Ni-DOBDC	MOF	M-173	Zr-MOF-805	MOF	1.61435	518.51
M-87	Co-MOF-74(S)	MOF	C-5	AB-COF	COF	1.61425	883.131
M-86	Co-MOF-74(M)	MOF	M-175	Zr-MOF-808	MOF	1.61295	939.461
M-92	CuBTC	MOF	M-175	Zr-MOF-808	MOF	1.61217	570.447
M-87	Co-MOF-74(S)	MOF	M-109	Mg-CUK-1	MOF	1.61018	862.933
M-86	Co-MOF-74(M)	MOF	M-81	Co2Cl2(BTDD)	MOF	1.60995	1253.66
M-92	CuBTC	MOF	M-81	Co2Cl2(BTDD)	MOF	1.60918	672.321
M-86	Co-MOF-74(M)	MOF	C-4	AB-COF	COF	1.608	792.106
Z-10	Zeolite Na-A	Zeolite	M-175	Zr-MOF-808	MOF	1.60779	631.252
M-86	Co-MOF-74(M)	MOF	M-78	CAU-23	MOF	1.60749	869.144
M-92	CuBTC	MOF	C-4	AB-COF	COF	1.60723	511.97
M-92	CuBTC	MOF	M-78	CAU-23	MOF	1.60671	543.033
M-86	Co-MOF-74(M)	MOF	M-133	Ni2Cl2(BTDD)	MOF	1.60641	1092.51
M-86	Co-MOF-74(M)	MOF	M-176	Zr-MOF-841	MOF	1.60605	951.909
M-92	CuBTC	MOF	M-133	Ni2Cl2(BTDD)	MOF	1.60564	622.423
M-92	CuBTC	MOF	M-176	Zr-MOF-841	MOF	1.60527	574.039
M-136	Ni-DOBDC	MOF	M-107	MFU-4	MOF	1.60527	673.389
Z-10	Zeolite Na-A	Zeolite	M-81	Co2Cl2(BTDD)	MOF	1.6048	759.021
Z-10	Zeolite Na-A	Zeolite	C-4	AB-COF	COF	1.60285	560.409
M-87	Co-MOF-74(S)	MOF	C-48	TpPa-1	COF	1.60255	645.16
Z-10	Zeolite Na-A	Zeolite	M-78	CAU-23	MOF	1.60233	597.973
M-136	Ni-DOBDC	MOF	M-113	MIL-100(Cr)-DEG	MOF	1.6022	448.745
M-88	CPO-27-Ni	MOF	M-175	Zr-MOF-808	MOF	1.60146	857.242
Z-10	Zeolite Na-A	Zeolite	M-133	Ni2Cl2(BTDD)	MOF	1.60126	696.05
M-86	Co-MOF-74(M)	MOF	C-5	AB-COF	COF	1.60113	806.141
Z-10	Zeolite Na-A	Zeolite	M-176	Zr-MOF-841	MOF	1.60089	635.959
M-92	CuBTC	MOF	C-5	AB-COF	COF	1.60035	517.005
M-136	Ni-DOBDC	MOF	M-26	{[Cu(azpy)(glut)](H2O)2}	MOF	1.60028	404.915
M-136	Ni-DOBDC	MOF	P-12	DUT-93	POP	1.59924	325.474
M-88	CPO-27-Ni	MOF	M-81	Co2Cl2(BTDD)	MOF	1.59846	1113.55
M-136	Ni-DOBDC	MOF	C-50	TpPa-2	COF	1.59819	413.78
M-86	Co-MOF-74(M)	MOF	M-109	Mg-CUK-1	MOF	1.59706	788.97
M-88	CPO-27-Ni	MOF	C-4	AB-COF	COF	1.59652	731.909
M-87	Co-MOF-74(S)	MOF	C-47	TpPa-1	COF	1.59642	773.975
M-92	CuBTC	MOF	M-109	Mg-CUK-1	MOF	1.59629	509.426
M-88	CPO-27-Ni	MOF	M-78	CAU-23	MOF	1.596	797.692
Z-10	Zeolite Na-A	Zeolite	C-5	AB-COF	COF	1.59597	566.698
M-87	Co-MOF-74(S)	MOF	M-117	MIL-100(Fe)	MOF	1.59505	775.438
M-88	CPO-27-Ni	MOF	M-133	Ni2Cl2(BTDD)	MOF	1.59492	983.517
M-88	CPO-27-Ni	MOF	M-176	Zr-MOF-841	MOF	1.59456	867.338
M-136	Ni-DOBDC	MOF	C-25	CTF-b	COF	1.59453	503.232
M-136	Ni-DOBDC	MOF	M-115	MIL-100(Cr)-EN	MOF	1.59345	452.467
M-136	Ni-DOBDC	MOF	M-146	UiO-66	MOF	1.59262	418.073
Z-10	Zeolite Na-A	Zeolite	M-109	Mg-CUK-1	MOF	1.59191	557.715
M-87	Co-MOF-74(S)	MOF	P-1	2D ep-POP	POP	1.59103	474.294
M-87	Co-MOF-74(S)	MOF	M-120	MIL-101-SO3H	MOF	1.59033	814.416
M-136	Ni-DOBDC	MOF	P-2	3D ep-POP	POP	1.58981	463.931
M-87	Co-MOF-74(S)	MOF	M-148	UiO-66(Zr4+) with high concentration stearic acid	MOF	1.58974	892.063
M-88	CPO-27-Ni	MOF	C-5	AB-COF	COF	1.58964	743.715
M-86	Co-MOF-74(M)	MOF	C-48	TpPa-1	COF	1.58943	601.544
M-136	Ni-DOBDC	MOF	M-70	CAU-10-NO2	MOF	1.58884	359.346
M-92	CuBTC	MOF	C-48	TpPa-1	COF	1.58866	423.47
M-136	Ni-DOBDC	MOF	C-53	TpPa-NO2	COF	1.58859	458.531
M-136	Ni-DOBDC	MOF	M-123	MIL-125-NH2	MOF	1.58834	639.881
M-87	Co-MOF-74(S)	MOF	M-149	UiO-66(Zr4+) with metal/ligand ratio 6:3	MOF	1.58832	815.164
M-136	Ni-DOBDC	MOF	Carb-3	Activated Carbon AT400R1t75	Carbon	1.58782	334.602
M-103	HKUST-1-F	MOF	M-175	Zr-MOF-808	MOF	1.58772	437.846
M-88	CPO-27-Ni	MOF	M-109	Mg-CUK-1	MOF	1.58558	728.831
M-103	HKUST-1-F	MOF	M-81	Co2Cl2(BTDD)	MOF	1.58473	496.232
M-87	Co-MOF-74(S)	MOF	C-26	CTF-c	COF	1.58469	426.64
M-136	Ni-DOBDC	MOF	C-35	TpAnq	COF	1.58441	326.359
Z-10	Zeolite Na-A	Zeolite	C-48	TpPa-1	COF	1.58428	456.254
M-87	Co-MOF-74(S)	MOF	M-100	DUT-67	MOF	1.58388	788.5
M-87	Co-MOF-74(S)	MOF	M-105	Lanthanum Triazolyl Phosphonate MOF	MOF	1.58345	666.431
M-87	Co-MOF-74(S)	MOF	M-111	MIL-100	MOF	1.58341	625.551
M-86	Co-MOF-74(M)	MOF	C-47	TpPa-1	COF	1.5833	712.903
M-87	Co-MOF-74(S)	MOF	M-173	Zr-MOF-805	MOF	1.58318	548.029
M-136	Ni-DOBDC	MOF	C-20	bpim -CTF -500	COF	1.58302	376.344
M-103	HKUST-1-F	MOF	C-4	AB-COF	COF	1.58278	401.786
M-136	Ni-DOBDC	MOF	C-55	TpTta	COF	1.58276	325.491
M-92	CuBTC	MOF	C-47	TpPa-1	COF	1.58253	475.206
M-103	HKUST-1-F	MOF	M-78	CAU-23	MOF	1.58226	420.946
M-86	Co-MOF-74(M)	MOF	M-117	MIL-100(Fe)	MOF	1.58193	714.106
M-136	Ni-DOBDC	MOF	C-17	bipy -CTF500	COF	1.58135	432.042
M-103	HKUST-1-F	MOF	M-133	Ni2Cl2(BTDD)	MOF	1.58119	467.847
M-92	CuBTC	MOF	M-117	MIL-100(Fe)	MOF	1.58116	475.603
M-136	Ni-DOBDC	MOF	M-116	MIL-100(Cr)-TEG	MOF	1.58095	367.946
M-103	HKUST-1-F	MOF	M-176	Zr-MOF-841	MOF	1.58082	439.544
M-136	Ni-DOBDC	MOF	Carb-4	Activated Carbon AT467R117t45	Carbon	1.58023	294.274
Z-10	Zeolite Na-A	Zeolite	C-47	TpPa-1	COF	1.57814	517.251
M-136	Ni-DOBDC	MOF	Carb-6	Activated Carbon AT800R15t120	Carbon	1.57802	390.875
M-88	CPO-27-Ni	MOF	C-48	TpPa-1	COF	1.57795	564.858
M-86	Co-MOF-74(M)	MOF	P-1	2D ep-POP	POP	1.57791	449.187
M-86	Co-MOF-74(M)	MOF	M-120	MIL-101-SO3H	MOF	1.57721	747.132
M-92	CuBTC	MOF	P-1	2D ep-POP	POP	1.57714	341.217
Z-10	Zeolite Na-A	Zeolite	M-117	MIL-100(Fe)	MOF	1.57678	517.763
M-86	Co-MOF-74(M)	MOF	M-148	UiO-66(Zr4+) with high concentration stearic acid	MOF	1.57662	812.528
M-92	CuBTC	MOF	M-120	MIL-101-SO3H	MOF	1.57644	489.533
M-103	HKUST-1-F	MOF	C-5	AB-COF	COF	1.5759	404.545
M-92	CuBTC	MOF	M-148	UiO-66(Zr4+) with high concentration stearic acid	MOF	1.57585	516.729
M-136	Ni-DOBDC	MOF	Carb-5	Activated Carbon AT600R1t30	Carbon	1.57577	369.108
M-86	Co-MOF-74(M)	MOF	M-149	UiO-66(Zr4+) with metal/ligand ratio 6:3	MOF	1.5752	747.688
M-92	CuBTC	MOF	M-149	UiO-66(Zr4+) with metal/ligand ratio 6:3	MOF	1.57443	489.556
M-87	Co-MOF-74(S)	MOF	M-107	MFU-4	MOF	1.5741	728.991
M-136	Ni-DOBDC	MOF	M-114	MIL-100(Cr)-EG	MOF	1.57381	378.465
Z-10	Zeolite Na-A	Zeolite	P-1	2D ep-POP	POP	1.57275	362.142
Z-10	Zeolite Na-A	Zeolite	M-120	MIL-101-SO3H	MOF	1.57206	534.509
M-103	HKUST-1-F	MOF	M-109	Mg-CUK-1	MOF	1.57184	399.597
M-88	CPO-27-Ni	MOF	C-47	TpPa-1	COF	1.57181	662.601
M-86	Co-MOF-74(M)	MOF	C-26	CTF-c	COF	1.57157	405.813
Z-10	Zeolite Na-A	Zeolite	M-148	UiO-66(Zr4+) with high concentration stearic acid	MOF	1.57147	567.216
M-87	Co-MOF-74(S)	MOF	M-113	MIL-100(Cr)-DEG	MOF	1.57102	469.549
M-136	Ni-DOBDC	MOF	C-31	MM2	COF	1.571	351.654
M-92	CuBTC	MOF	C-26	CTF-c	COF	1.5708	315.3
M-86	Co-MOF-74(M)	MOF	M-100	DUT-67	MOF	1.57076	724.848
M-136	Ni-DOBDC	MOF	C-49	TpPa-2	COF	1.57062	304.908
M-88	CPO-27-Ni	MOF	M-117	MIL-100(Fe)	MOF	1.57045	663.606
M-86	Co-MOF-74(M)	MOF	M-105	Lanthanum Triazolyl Phosphonate MOF	MOF	1.57034	619.628
M-86	Co-MOF-74(M)	MOF	M-111	MIL-100	MOF	1.57029	583.855
M-86	Co-MOF-74(M)	MOF	M-173	Zr-MOF-805	MOF	1.57006	515.254
Z-10	Zeolite Na-A	Zeolite	M-149	UiO-66(Zr4+) with metal/ligand ratio 6:3	MOF	1.57005	534.599
M-92	CuBTC	MOF	M-100	DUT-67	MOF	1.56998	479.196
M-136	Ni-DOBDC	MOF	Carb-14	Carbon AG5-HNO3	Carbon	1.56996	269.018
M-92	CuBTC	MOF	M-105	Lanthanum Triazolyl Phosphonate MOF	MOF	1.56956	430.773
M-92	CuBTC	MOF	M-111	MIL-100	MOF	1.56952	413.162
M-136	Ni-DOBDC	MOF	M-76	CAU-1-NHCH3	MOF	1.56936	316.624
M-92	CuBTC	MOF	M-173	Zr-MOF-805	MOF	1.56928	377.556
M-87	Co-MOF-74(S)	MOF	M-26	{[Cu(azpy)(glut)](H2O)2}	MOF	1.56911	420.948
M-87	Co-MOF-74(S)	MOF	P-12	DUT-93	POP	1.56806	334.414
M-87	Co-MOF-74(S)	MOF	C-50	TpPa-2	COF	1.56702	430.756
M-88	CPO-27-Ni	MOF	P-1	2D ep-POP	POP	1.56642	427.507
Z-10	Zeolite Na-A	Zeolite	C-26	CTF-c	COF	1.56642	333.085
M-136	Ni-DOBDC	MOF	M-74	CAU-13	MOF	1.56632	345.204
M-88	CPO-27-Ni	MOF	M-120	MIL-101-SO3H	MOF	1.56573	692.098
Z-10	Zeolite Na-A	Zeolite	M-100	DUT-67	MOF	1.5656	522.369
Z-10	Zeolite Na-A	Zeolite	M-105	Lanthanum Triazolyl Phosphonate MOF	MOF	1.56518	465.215
M-88	CPO-27-Ni	MOF	M-148	UiO-66(Zr4+) with high concentration stearic acid	MOF	1.56514	748.275
Z-10	Zeolite Na-A	Zeolite	M-111	MIL-100	MOF	1.56514	444.688
Z-10	Zeolite Na-A	Zeolite	M-173	Zr-MOF-805	MOF	1.5649	403.611
M-136	Ni-DOBDC	MOF	M-161	Zn(NDI-SO2Et)	MOF	1.56447	314.698
M-103	HKUST-1-F	MOF	C-48	TpPa-1	COF	1.56421	343.662
M-88	CPO-27-Ni	MOF	M-149	UiO-66(Zr4+) with metal/ligand ratio 6:3	MOF	1.56371	692.512
M-87	Co-MOF-74(S)	MOF	C-25	CTF-b	COF	1.56335	531.033
M-87	Co-MOF-74(S)	MOF	M-115	MIL-100(Cr)-EN	MOF	1.56228	473.832
M-87	Co-MOF-74(S)	MOF	M-146	UiO-66	MOF	1.56144	435.568
M-136	Ni-DOBDC	MOF	M-160	Zn(NDI-SEt)	MOF	1.56132	376.348
M-136	Ni-DOBDC	MOF	M-162	Zn(NDI-SOEt)	MOF	1.56132	376.348
M-136	Ni-DOBDC	MOF	M-119	MIL-101-NH2	MOF	1.56114	281.667
M-86	Co-MOF-74(M)	MOF	M-107	MFU-4	MOF	1.56098	673.538
M-92	CuBTC	MOF	M-107	MFU-4	MOF	1.5602	455.288
M-88	CPO-27-Ni	MOF	C-26	CTF-c	COF	1.56008	387.703
M-110	Mg-MOF-74?	MOF	M-175	Zr-MOF-808	MOF	1.55988	760.812
M-136	Ni-DOBDC	MOF	P-22	MOPI-IV	POP	1.55942	316.54
M-88	CPO-27-Ni	MOF	M-100	DUT-67	MOF	1.55927	672.596
M-88	CPO-27-Ni	MOF	M-105	Lanthanum Triazolyl Phosphonate MOF	MOF	1.55885	580.45
M-88	CPO-27-Ni	MOF	M-111	MIL-100	MOF	1.55881	548.722
M-87	Co-MOF-74(S)	MOF	P-2	3D ep-POP	POP	1.55863	486.733
M-88	CPO-27-Ni	MOF	M-173	Zr-MOF-805	MOF	1.55857	487.294
M-103	HKUST-1-F	MOF	C-47	TpPa-1	COF	1.55807	377.236
M-86	Co-MOF-74(M)	MOF	M-113	MIL-100(Cr)-DEG	MOF	1.5579	444.593
M-87	Co-MOF-74(S)	MOF	M-70	CAU-10-NO2	MOF	1.55767	371.147
M-87	Co-MOF-74(S)	MOF	C-53	TpPa-NO2	COF	1.55741	480.694
M-87	Co-MOF-74(S)	MOF	M-123	MIL-125-NH2	MOF	1.55716	689.728
M-92	CuBTC	MOF	M-113	MIL-100(Cr)-DEG	MOF	1.55713	337.525
M-110	Mg-MOF-74?	MOF	M-81	Co2Cl2(BTDD)	MOF	1.55689	962.469
M-103	HKUST-1-F	MOF	M-117	MIL-100(Fe)	MOF	1.55671	377.421
M-87	Co-MOF-74(S)	MOF	Carb-3	Activated Carbon AT400R1t75	Carbon	1.55664	344.328
M-86	Co-MOF-74(M)	MOF	M-26	{[Cu(azpy)(glut)](H2O)2}	MOF	1.55599	400.423
Z-10	Zeolite Na-A	Zeolite	M-107	MFU-4	MOF	1.55582	494.276
M-92	CuBTC	MOF	M-26	{[Cu(azpy)(glut)](H2O)2}	MOF	1.55521	311.346
M-86	Co-MOF-74(M)	MOF	P-12	DUT-93	POP	1.55494	320.787
M-110	Mg-MOF-74?	MOF	C-4	AB-COF	COF	1.55494	657.914
M-110	Mg-MOF-74?	MOF	M-78	CAU-23	MOF	1.55442	712.089
M-92	CuBTC	MOF	P-12	DUT-93	POP	1.55417	260.918
M-86	Co-MOF-74(M)	MOF	C-50	TpPa-2	COF	1.5539	409.337
M-110	Mg-MOF-74?	MOF	M-133	Ni2Cl2(BTDD)	MOF	1.55335	861.158
M-136	Ni-DOBDC	MOF	M-129	MIP-200	MOF	1.55332	590.549
M-87	Co-MOF-74(S)	MOF	C-35	TpAnq	COF	1.55323	335.456
M-92	CuBTC	MOF	C-50	TpPa-2	COF	1.55312	316.615
M-110	Mg-MOF-74?	MOF	M-176	Zr-MOF-841	MOF	1.55298	768.58
Z-10	Zeolite Na-A	Zeolite	M-113	MIL-100(Cr)-DEG	MOF	1.55274	358.254
M-103	HKUST-1-F	MOF	P-1	2D ep-POP	POP	1.55268	286.36
M-103	HKUST-1-F	MOF	M-120	MIL-101-SO3H	MOF	1.55199	386.033
M-136	Ni-DOBDC	MOF	M-71	CAU-10-OCH3	MOF	1.55196	290.145
M-87	Co-MOF-74(S)	MOF	C-20	bpim -CTF -500	COF	1.55185	389.742
M-87	Co-MOF-74(S)	MOF	C-55	TpTta	COF	1.55158	334.531
M-103	HKUST-1-F	MOF	M-148	UiO-66(Zr4+) with high concentration stearic acid	MOF	1.5514	402.99
Z-10	Zeolite Na-A	Zeolite	M-26	{[Cu(azpy)(glut)](H2O)2}	MOF	1.55083	328.848
M-86	Co-MOF-74(M)	MOF	C-25	CTF-b	COF	1.55023	499.708
M-87	Co-MOF-74(S)	MOF	C-17	bipy -CTF500	COF	1.55017	451.211
M-103	HKUST-1-F	MOF	M-149	UiO-66(Zr4+) with metal/ligand ratio 6:3	MOF	1.54998	385.942
M-136	Ni-DOBDC	MOF	M-27	{[Cu2(4-pmpmd)2(CH3OH)4(opd)2]*2H2O}	MOF	1.54982	236.227
Z-10	Zeolite Na-A	Zeolite	P-12	DUT-93	POP	1.54979	272.976
M-87	Co-MOF-74(S)	MOF	M-116	MIL-100(Cr)-TEG	MOF	1.54978	380.584
M-88	CPO-27-Ni	MOF	M-107	MFU-4	MOF	1.54949	627.618
M-92	CuBTC	MOF	C-25	CTF-b	COF	1.54946	367.907
M-86	Co-MOF-74(M)	MOF	M-115	MIL-100(Cr)-EN	MOF	1.54916	448.328
M-87	Co-MOF-74(S)	MOF	Carb-4	Activated Carbon AT467R117t45	Carbon	1.54905	301.06
Z-10	Zeolite Na-A	Zeolite	C-50	TpPa-2	COF	1.54874	334.774
M-92	CuBTC	MOF	M-115	MIL-100(Cr)-EN	MOF	1.54838	339.21
M-86	Co-MOF-74(M)	MOF	M-146	UiO-66	MOF	1.54832	413.643
M-110	Mg-MOF-74?	MOF	C-5	AB-COF	COF	1.54806	667.394
M-92	CuBTC	MOF	M-146	UiO-66	MOF	1.54755	318.924
M-87	Co-MOF-74(S)	MOF	Carb-6	Activated Carbon AT800R15t120	Carbon	1.54684	405.724
M-88	CPO-27-Ni	MOF	M-113	MIL-100(Cr)-DEG	MOF	1.54641	423.053
M-103	HKUST-1-F	MOF	C-26	CTF-c	COF	1.54635	267.443
M-136	Ni-DOBDC	MOF	M-77	CAU-1-NHCOCH3	MOF	1.54633	345.194
M-103	HKUST-1-F	MOF	M-100	DUT-67	MOF	1.54553	379.147
M-86	Co-MOF-74(M)	MOF	P-2	3D ep-POP	POP	1.54551	459.902
M-103	HKUST-1-F	MOF	M-105	Lanthanum Triazolyl Phosphonate MOF	MOF	1.54511	347.712
Z-10	Zeolite Na-A	Zeolite	C-25	CTF-b	COF	1.54508	392.911
M-103	HKUST-1-F	MOF	M-111	MIL-100	MOF	1.54507	335.968
M-136	Ni-DOBDC	MOF	M-40	1-LiCl	MOF	1.54489	286.249
M-103	HKUST-1-F	MOF	M-173	Zr-MOF-805	MOF	1.54483	311.68
M-92	CuBTC	MOF	P-2	3D ep-POP	POP	1.54474	345.595
M-87	Co-MOF-74(S)	MOF	Carb-5	Activated Carbon AT600R1t30	Carbon	1.54459	381.896
M-86	Co-MOF-74(M)	MOF	M-70	CAU-10-NO2	MOF	1.54455	354.645
M-88	CPO-27-Ni	MOF	M-26	{[Cu(azpy)(glut)](H2O)2}	MOF	1.5445	382.575
M-86	Co-MOF-74(M)	MOF	C-53	TpPa-NO2	COF	1.54429	454.441
M-86	Co-MOF-74(M)	MOF	M-123	MIL-125-NH2	MOF	1.54404	639.105
Z-10	Zeolite Na-A	Zeolite	M-115	MIL-100(Cr)-EN	MOF	1.544	360.284
M-110	Mg-MOF-74?	MOF	M-109	Mg-CUK-1	MOF	1.544	654.892
M-92	CuBTC	MOF	M-70	CAU-10-NO2	MOF	1.54377	282.511
M-86	Co-MOF-74(M)	MOF	Carb-3	Activated Carbon AT400R1t75	Carbon	1.54352	329.875
M-92	CuBTC	MOF	C-53	TpPa-NO2	COF	1.54352	342.434
M-88	CPO-27-Ni	MOF	P-12	DUT-93	POP	1.54346	308.781
M-92	CuBTC	MOF	M-123	MIL-125-NH2	MOF	1.54327	437.78
M-136	Ni-DOBDC	MOF	P-10	DUT-92(NH2)	POP	1.54319	232.629
Z-10	Zeolite Na-A	Zeolite	M-146	UiO-66	MOF	1.54317	337.434
M-92	CuBTC	MOF	Carb-3	Activated Carbon AT400R1t75	Carbon	1.54275	266.525
M-87	Co-MOF-74(S)	MOF	M-114	MIL-100(Cr)-EG	MOF	1.54263	392.147
M-88	CPO-27-Ni	MOF	C-50	TpPa-2	COF	1.54241	390.741
M-168	Zn-MOF-74(cycle 1)	MOF	M-175	Zr-MOF-808	MOF	1.54164	518.994
Z-7	Na-ZSM-5	Zeolite	M-175	Zr-MOF-808	MOF	1.54164	518.994
M-61	C4H8HoKO12 Dehydrated	MOF	M-175	Zr-MOF-808	MOF	1.54065	527.134
Z-10	Zeolite Na-A	Zeolite	P-2	3D ep-POP	POP	1.54035	367.572
M-86	Co-MOF-74(M)	MOF	C-35	TpAnq	COF	1.54011	321.627
M-87	Co-MOF-74(S)	MOF	C-31	MM2	COF	1.53982	362.921
M-87	Co-MOF-74(S)	MOF	C-49	TpPa-2	COF	1.53944	312.48
Z-10	Zeolite Na-A	Zeolite	M-70	CAU-10-NO2	MOF	1.53939	296.876
M-92	CuBTC	MOF	C-35	TpAnq	COF	1.53934	261.003
Z-10	Zeolite Na-A	Zeolite	C-53	TpPa-NO2	COF	1.53913	364.006
Z-10	Zeolite Na-A	Zeolite	M-123	MIL-125-NH2	MOF	1.53888	474.08
M-87	Co-MOF-74(S)	MOF	Carb-14	Carbon AG5-HNO3	Carbon	1.53878	274.23
M-88	CPO-27-Ni	MOF	C-25	CTF-b	COF	1.53875	472.944
M-86	Co-MOF-74(M)	MOF	C-20	bpim -CTF -500	COF	1.53873	371.671
M-168	Zn-MOF-74(cycle 1)	MOF	M-81	Co2Cl2(BTDD)	MOF	1.53864	606.303
Z-7	Na-ZSM-5	Zeolite	M-81	Co2Cl2(BTDD)	MOF	1.53864	606.303
M-86	Co-MOF-74(M)	MOF	C-55	TpTta	COF	1.53846	320.755
Z-10	Zeolite Na-A	Zeolite	Carb-3	Activated Carbon AT400R1t75	Carbon	1.53837	279.236
M-87	Co-MOF-74(S)	MOF	M-76	CAU-1-NHCH3	MOF	1.53818	325.063
M-92	CuBTC	MOF	C-20	bpim -CTF -500	COF	1.53795	292.983
M-92	CuBTC	MOF	C-55	TpTta	COF	1.53769	260.376
M-88	CPO-27-Ni	MOF	M-115	MIL-100(Cr)-EN	MOF	1.53767	426.34
M-61	C4H8HoKO12 Dehydrated	MOF	M-81	Co2Cl2(BTDD)	MOF	1.53765	617.532
M-86	Co-MOF-74(M)	MOF	C-17	bipy -CTF500	COF	1.53705	427.686
M-88	CPO-27-Ni	MOF	M-146	UiO-66	MOF	1.53684	394.627
M-168	Zn-MOF-74(cycle 1)	MOF	C-4	AB-COF	COF	1.53669	467.993
Z-7	Na-ZSM-5	Zeolite	C-4	AB-COF	COF	1.53669	467.993
M-86	Co-MOF-74(M)	MOF	M-116	MIL-100(Cr)-TEG	MOF	1.53666	363.242
M-110	Mg-MOF-74?	MOF	C-48	TpPa-1	COF	1.53637	516.312
M-92	CuBTC	MOF	C-17	bipy -CTF500	COF	1.53628	326.649
M-168	Zn-MOF-74(cycle 1)	MOF	M-78	CAU-23	MOF	1.53618	495.054
Z-7	Na-ZSM-5	Zeolite	M-78	CAU-23	MOF	1.53618	495.054
M-86	Co-MOF-74(M)	MOF	Carb-4	Activated Carbon AT467R117t45	Carbon	1.53593	289.6
M-92	CuBTC	MOF	M-116	MIL-100(Cr)-TEG	MOF	1.53588	287.636
M-103	HKUST-1-F	MOF	M-107	MFU-4	MOF	1.53575	363.328
M-61	C4H8HoKO12 Dehydrated	MOF	C-4	AB-COF	COF	1.5357	474.592
M-61	C4H8HoKO12 Dehydrated	MOF	M-78	CAU-23	MOF	1.53519	502.466
M-92	CuBTC	MOF	Carb-4	Activated Carbon AT467R117t45	Carbon	1.53516	239.386
M-87	Co-MOF-74(S)	MOF	M-74	CAU-13	MOF	1.53514	355.952
M-168	Zn-MOF-74(cycle 1)	MOF	M-133	Ni2Cl2(BTDD)	MOF	1.5351	563.561
Z-7	Na-ZSM-5	Zeolite	M-133	Ni2Cl2(BTDD)	MOF	1.5351	563.561
Z-10	Zeolite Na-A	Zeolite	C-35	TpAnq	COF	1.53496	273.192
M-168	Zn-MOF-74(cycle 1)	MOF	M-176	Zr-MOF-841	MOF	1.53474	521.89
Z-7	Na-ZSM-5	Zeolite	M-176	Zr-MOF-841	MOF	1.53474	521.89
M-61	C4H8HoKO12 Dehydrated	MOF	M-133	Ni2Cl2(BTDD)	MOF	1.53411	573.245
M-88	CPO-27-Ni	MOF	P-2	3D ep-POP	POP	1.53402	436.821
M-61	C4H8HoKO12 Dehydrated	MOF	M-176	Zr-MOF-841	MOF	1.53375	530.161
M-86	Co-MOF-74(M)	MOF	Carb-6	Activated Carbon AT800R15t120	Carbon	1.53372	386.246
Z-10	Zeolite Na-A	Zeolite	C-20	bpim -CTF -500	COF	1.53357	308.558
Z-10	Zeolite Na-A	Zeolite	C-55	TpTta	COF	1.5333	272.516
M-87	Co-MOF-74(S)	MOF	M-161	Zn(NDI-SO2Et)	MOF	1.53329	323.02
M-88	CPO-27-Ni	MOF	M-70	CAU-10-NO2	MOF	1.53306	340.192
M-92	CuBTC	MOF	Carb-6	Activated Carbon AT800R15t120	Carbon	1.53295	301.755
M-88	CPO-27-Ni	MOF	C-53	TpPa-NO2	COF	1.5328	431.838
M-103	HKUST-1-F	MOF	M-113	MIL-100(Cr)-DEG	MOF	1.53267	283.125
M-88	CPO-27-Ni	MOF	M-123	MIL-125-NH2	MOF	1.53255	596.973
M-88	CPO-27-Ni	MOF	Carb-3	Activated Carbon AT400R1t75	Carbon	1.53204	317.167
Z-10	Zeolite Na-A	Zeolite	C-17	bipy -CTF500	COF	1.5319	346.271
Z-10	Zeolite Na-A	Zeolite	M-116	MIL-100(Cr)-TEG	MOF	1.5315	302.638
M-86	Co-MOF-74(M)	MOF	Carb-5	Activated Carbon AT600R1t30	Carbon	1.53147	364.39
Z-10	Zeolite Na-A	Zeolite	Carb-4	Activated Carbon AT467R117t45	Carbon	1.53078	249.567
M-103	HKUST-1-F	MOF	M-26	{[Cu(azpy)(glut)](H2O)2}	MOF	1.53076	264.144
M-92	CuBTC	MOF	Carb-5	Activated Carbon AT600R1t30	Carbon	1.5307	288.153
M-110	Mg-MOF-74?	MOF	C-47	TpPa-1	COF	1.53024	599.077
M-87	Co-MOF-74(S)	MOF	M-160	Zn(NDI-SEt)	MOF	1.53014	389.943
M-87	Co-MOF-74(S)	MOF	M-162	Zn(NDI-SOEt)	MOF	1.53014	389.943
M-87	Co-MOF-74(S)	MOF	M-119	MIL-101-NH2	MOF	1.52996	287.7
M-168	Zn-MOF-74(cycle 1)	MOF	C-5	AB-COF	COF	1.52982	472.208
Z-7	Na-ZSM-5	Zeolite	C-5	AB-COF	COF	1.52982	472.208
M-103	HKUST-1-F	MOF	P-12	DUT-93	POP	1.52972	226.403
M-86	Co-MOF-74(M)	MOF	M-114	MIL-100(Cr)-EG	MOF	1.52951	373.772
M-110	Mg-MOF-74?	MOF	M-117	MIL-100(Fe)	MOF	1.52887	599.87
M-61	C4H8HoKO12 Dehydrated	MOF	C-5	AB-COF	COF	1.52882	478.961
M-92	CuBTC	MOF	M-114	MIL-100(Cr)-EG	MOF	1.52874	293.91
M-103	HKUST-1-F	MOF	C-50	TpPa-2	COF	1.52867	267.932
M-88	CPO-27-Ni	MOF	C-35	TpAnq	COF	1.52863	309.453
Z-10	Zeolite Na-A	Zeolite	Carb-6	Activated Carbon AT800R15t120	Carbon	1.52856	318.389
M-87	Co-MOF-74(S)	MOF	P-22	MOPI-IV	POP	1.52824	325.029
M-136	Ni-DOBDC	MOF	M-5	[Co3(ndc)-(HCOO)3(mu3-OH)(H2O)]n	MOF	1.52792	345.807
M-88	CPO-27-Ni	MOF	C-20	bpim -CTF -500	COF	1.52724	355.893
M-88	CPO-27-Ni	MOF	C-55	TpTta	COF	1.52697	308.626
M-86	Co-MOF-74(M)	MOF	C-31	MM2	COF	1.5267	346.887
M-86	Co-MOF-74(M)	MOF	C-49	TpPa-2	COF	1.52632	300.172
Z-10	Zeolite Na-A	Zeolite	Carb-5	Activated Carbon AT600R1t30	Carbon	1.52632	303.266
M-92	CuBTC	MOF	C-31	MM2	COF	1.52593	276.917
M-168	Zn-MOF-74(cycle 1)	MOF	M-109	Mg-CUK-1	MOF	1.52575	465.483
Z-7	Na-ZSM-5	Zeolite	M-109	Mg-CUK-1	MOF	1.52575	465.483
M-86	Co-MOF-74(M)	MOF	Carb-14	Carbon AG5-HNO3	Carbon	1.52566	264.432
M-88	CPO-27-Ni	MOF	C-17	bipy -CTF500	COF	1.52557	407.345
M-92	CuBTC	MOF	C-49	TpPa-2	COF	1.52555	246.291
M-136	Ni-DOBDC	MOF	M-102	Et-MnCr	MOF	1.5255	231.944
M-88	CPO-27-Ni	MOF	M-116	MIL-100(Cr)-TEG	MOF	1.52517	348.08
M-86	Co-MOF-74(M)	MOF	M-76	CAU-1-NHCH3	MOF	1.52506	311.858
M-103	HKUST-1-F	MOF	C-25	CTF-b	COF	1.52501	304.295
M-92	CuBTC	MOF	Carb-14	Carbon AG5-HNO3	Carbon	1.52489	221.678
M-110	Mg-MOF-74?	MOF	P-1	2D ep-POP	POP	1.52484	396.453
M-61	C4H8HoKO12 Dehydrated	MOF	M-109	Mg-CUK-1	MOF	1.52476	472.057
M-136	Ni-DOBDC	MOF	P-20	MOPI-II	POP	1.52461	212.016
M-88	CPO-27-Ni	MOF	Carb-4	Activated Carbon AT467R117t45	Carbon	1.52445	279.464
Z-10	Zeolite Na-A	Zeolite	M-114	MIL-100(Cr)-EG	MOF	1.52435	309.69
M-92	CuBTC	MOF	M-76	CAU-1-NHCH3	MOF	1.52429	254.068
M-110	Mg-MOF-74?	MOF	M-120	MIL-101-SO3H	MOF	1.52415	623.521
M-103	HKUST-1-F	MOF	M-115	MIL-100(Cr)-EN	MOF	1.52393	284.065
M-110	Mg-MOF-74?	MOF	M-148	UiO-66(Zr4+) with high concentration stearic acid	MOF	1.52356	670.052
M-103	HKUST-1-F	MOF	M-146	UiO-66	MOF	1.5231	269.458
M-136	Ni-DOBDC	MOF	C-19	bpim -CTF -400	COF	1.52287	323.715
M-88	CPO-27-Ni	MOF	Carb-6	Activated Carbon AT800R15t120	Carbon	1.52223	369.285
M-87	Co-MOF-74(S)	MOF	M-129	MIP-200	MOF	1.52215	632.722
M-110	Mg-MOF-74?	MOF	M-149	UiO-66(Zr4+) with metal/ligand ratio 6:3	MOF	1.52214	623.785
M-86	Co-MOF-74(M)	MOF	M-74	CAU-13	MOF	1.52202	340.415
M-73	CAU-10-pydc	MOF	M-175	Zr-MOF-808	MOF	1.52173	391.733
M-117	MIL-100(Fe)	MOF	M-175	Zr-MOF-808	MOF	1.52171	329.86
Z-10	Zeolite Na-A	Zeolite	C-31	MM2	COF	1.52155	290.857
M-92	CuBTC	MOF	M-74	CAU-13	MOF	1.52125	272.609
Z-10	Zeolite Na-A	Zeolite	C-49	TpPa-2	COF	1.52117	257.174
M-87	Co-MOF-74(S)	MOF	M-71	CAU-10-OCH3	MOF	1.52078	296.778
M-136	Ni-DOBDC	MOF	C-41	TpBD-(NO2)2	COF	1.52054	208.151
Z-10	Zeolite Na-A	Zeolite	Carb-14	Carbon AG5-HNO3	Carbon	1.5205	230.391
M-103	HKUST-1-F	MOF	P-2	3D ep-POP	POP	1.52028	288.488
M-86	Co-MOF-74(M)	MOF	M-161	Zn(NDI-SO2Et)	MOF	1.52017	309.921
M-88	CPO-27-Ni	MOF	Carb-5	Activated Carbon AT600R1t30	Carbon	1.51999	349.093
Z-10	Zeolite Na-A	Zeolite	M-76	CAU-1-NHCH3	MOF	1.51991	265.702
M-92	CuBTC	MOF	M-161	Zn(NDI-SO2Et)	MOF	1.5194	252.631
M-103	HKUST-1-F	MOF	M-70	CAU-10-NO2	MOF	1.51932	242.528
M-103	HKUST-1-F	MOF	C-53	TpPa-NO2	COF	1.51906	286.209
M-136	Ni-DOBDC	MOF	M-150	UiO-66-NH2	MOF	1.5189	458.646
M-103	HKUST-1-F	MOF	M-123	MIL-125-NH2	MOF	1.51881	351.15
M-73	CAU-10-pydc	MOF	M-81	Co2Cl2(BTDD)	MOF	1.51874	439.967
M-117	MIL-100(Fe)	MOF	M-81	Co2Cl2(BTDD)	MOF	1.51871	363.285
M-87	Co-MOF-74(S)	MOF	M-27	{[Cu2(4-pmpmd)2(CH3OH)4(opd)2]*2H2O}	MOF	1.51865	239.68
M-110	Mg-MOF-74?	MOF	C-26	CTF-c	COF	1.51851	361.029
M-103	HKUST-1-F	MOF	Carb-3	Activated Carbon AT400R1t75	Carbon	1.5183	230.449
M-168	Zn-MOF-74(cycle 1)	MOF	C-48	TpPa-1	COF	1.51812	389.682
Z-7	Na-ZSM-5	Zeolite	C-48	TpPa-1	COF	1.51812	389.682
M-88	CPO-27-Ni	MOF	M-114	MIL-100(Cr)-EG	MOF	1.51802	357.74
M-110	Mg-MOF-74?	MOF	M-100	DUT-67	MOF	1.51769	606.976
M-110	Mg-MOF-74?	MOF	M-105	Lanthanum Triazolyl Phosphonate MOF	MOF	1.51727	529.086
M-110	Mg-MOF-74?	MOF	M-111	MIL-100	MOF	1.51723	501.907
M-61	C4H8HoKO12 Dehydrated	MOF	C-48	TpPa-1	COF	1.51713	394.259
M-86	Co-MOF-74(M)	MOF	M-160	Zn(NDI-SEt)	MOF	1.51702	371.609
M-86	Co-MOF-74(M)	MOF	M-162	Zn(NDI-SOEt)	MOF	1.51702	371.609
M-110	Mg-MOF-74?	MOF	M-173	Zr-MOF-805	MOF	1.51699	448.741
Z-10	Zeolite Na-A	Zeolite	M-74	CAU-13	MOF	1.51687	286.138
M-86	Co-MOF-74(M)	MOF	M-119	MIL-101-NH2	MOF	1.51684	276.988
M-73	CAU-10-pydc	MOF	C-4	AB-COF	COF	1.51679	361.332
M-117	MIL-100(Fe)	MOF	C-4	AB-COF	COF	1.51677	307.889
M-73	CAU-10-pydc	MOF	M-78	CAU-23	MOF	1.51627	377.442
M-117	MIL-100(Fe)	MOF	M-78	CAU-23	MOF	1.51625	319.492
M-92	CuBTC	MOF	M-160	Zn(NDI-SEt)	MOF	1.51625	292.059
M-92	CuBTC	MOF	M-162	Zn(NDI-SOEt)	MOF	1.51625	292.059
M-92	CuBTC	MOF	M-119	MIL-101-NH2	MOF	1.51606	230.214
M-136	Ni-DOBDC	MOF	P-27	NU-POP-1	POP	1.51599	227.367
M-88	CPO-27-Ni	MOF	C-31	MM2	COF	1.51522	332.837
M-73	CAU-10-pydc	MOF	M-133	Ni2Cl2(BTDD)	MOF	1.5152	416.478
M-117	MIL-100(Fe)	MOF	M-133	Ni2Cl2(BTDD)	MOF	1.51517	346.984
M-87	Co-MOF-74(S)	MOF	M-77	CAU-1-NHCOCH3	MOF	1.51515	356.087
M-86	Co-MOF-74(M)	MOF	P-22	MOPI-IV	POP	1.51512	311.743
Z-10	Zeolite Na-A	Zeolite	M-161	Zn(NDI-SO2Et)	MOF	1.51502	264.164
M-103	HKUST-1-F	MOF	C-35	TpAnq	COF	1.51489	226.176
M-88	CPO-27-Ni	MOF	C-49	TpPa-2	COF	1.51484	289.307
M-73	CAU-10-pydc	MOF	M-176	Zr-MOF-841	MOF	1.51483	392.961
M-117	MIL-100(Fe)	MOF	M-176	Zr-MOF-841	MOF	1.51481	330.492
M-92	CuBTC	MOF	P-22	MOPI-IV	POP	1.51435	253.684
M-174	Zr-MOF-806	MOF	M-175	Zr-MOF-808	MOF	1.51429	368.213
M-88	CPO-27-Ni	MOF	Carb-14	Carbon AG5-HNO3	Carbon	1.51417	255.736
M-87	Co-MOF-74(S)	MOF	M-40	1-LiCl	MOF	1.51371	292.651
M-88	CPO-27-Ni	MOF	M-76	CAU-1-NHCH3	MOF	1.51357	300.222
M-103	HKUST-1-F	MOF	C-20	bpim -CTF -500	COF	1.5135	250.193
M-103	HKUST-1-F	MOF	C-55	TpTta	COF	1.51323	225.664
M-87	Co-MOF-74(S)	MOF	P-10	DUT-92(NH2)	POP	1.51201	235.916
M-168	Zn-MOF-74(cycle 1)	MOF	C-47	TpPa-1	COF	1.51199	435.172
Z-7	Na-ZSM-5	Zeolite	C-47	TpPa-1	COF	1.51199	435.172
Z-10	Zeolite Na-A	Zeolite	M-160	Zn(NDI-SEt)	MOF	1.51187	307.765
Z-10	Zeolite Na-A	Zeolite	M-162	Zn(NDI-SOEt)	MOF	1.51187	307.765
M-103	HKUST-1-F	MOF	C-17	bipy -CTF500	COF	1.51183	274.718
Z-10	Zeolite Na-A	Zeolite	M-119	MIL-101-NH2	MOF	1.51168	239.711
M-103	HKUST-1-F	MOF	M-116	MIL-100(Cr)-TEG	MOF	1.51143	246.173
M-174	Zr-MOF-806	MOF	M-81	Co2Cl2(BTDD)	MOF	1.51129	410.695
M-136	Ni-DOBDC	MOF	M-141	SIM-1	MOF	1.51122	235.308
M-136	Ni-DOBDC	MOF	C-16	ATFG-COF	COF	1.5112	268.027
M-61	C4H8HoKO12 Dehydrated	MOF	C-47	TpPa-1	COF	1.511	440.946
M-103	HKUST-1-F	MOF	Carb-4	Activated Carbon AT467R117t45	Carbon	1.51071	209.444
M-168	Zn-MOF-74(cycle 1)	MOF	M-117	MIL-100(Fe)	MOF	1.51062	435.488
Z-7	Na-ZSM-5	Zeolite	M-117	MIL-100(Fe)	MOF	1.51062	435.488
M-88	CPO-27-Ni	MOF	M-74	CAU-13	MOF	1.51054	326.79
Z-10	Zeolite Na-A	Zeolite	P-22	MOPI-IV	POP	1.50996	265.36
M-73	CAU-10-pydc	MOF	C-5	AB-COF	COF	1.50991	363.493
M-117	MIL-100(Fe)	MOF	C-5	AB-COF	COF	1.50989	309.247
M-61	C4H8HoKO12 Dehydrated	MOF	M-117	MIL-100(Fe)	MOF	1.50963	441.276
M-174	Zr-MOF-806	MOF	C-4	AB-COF	COF	1.50935	341.042
M-86	Co-MOF-74(M)	MOF	M-129	MIP-200	MOF	1.50903	588.542
M-174	Zr-MOF-806	MOF	M-78	CAU-23	MOF	1.50883	355.424
M-88	CPO-27-Ni	MOF	M-161	Zn(NDI-SO2Et)	MOF	1.50868	298.377
M-103	HKUST-1-F	MOF	Carb-6	Activated Carbon AT800R15t120	Carbon	1.50849	256.54
M-92	CuBTC	MOF	M-129	MIP-200	MOF	1.50825	410.601
M-110	Mg-MOF-74?	MOF	M-107	MFU-4	MOF	1.50791	568.814
M-174	Zr-MOF-806	MOF	M-133	Ni2Cl2(BTDD)	MOF	1.50775	390
M-86	Co-MOF-74(M)	MOF	M-71	CAU-10-OCH3	MOF	1.50766	285.401
M-174	Zr-MOF-806	MOF	M-176	Zr-MOF-841	MOF	1.50739	369.202
M-92	CuBTC	MOF	M-71	CAU-10-OCH3	MOF	1.50689	235.751
M-168	Zn-MOF-74(cycle 1)	MOF	P-1	2D ep-POP	POP	1.5066	316.09
Z-7	Na-ZSM-5	Zeolite	P-1	2D ep-POP	POP	1.5066	316.09
M-103	HKUST-1-F	MOF	Carb-5	Activated Carbon AT600R1t30	Carbon	1.50625	246.435
M-168	Zn-MOF-74(cycle 1)	MOF	M-120	MIL-101-SO3H	MOF	1.5059	447.577
Z-7	Na-ZSM-5	Zeolite	M-120	MIL-101-SO3H	MOF	1.5059	447.577
M-73	CAU-10-pydc	MOF	M-109	Mg-CUK-1	MOF	1.50585	359.222
M-117	MIL-100(Fe)	MOF	M-109	Mg-CUK-1	MOF	1.50583	306.028
M-61	C4H8HoKO12 Dehydrated	MOF	P-1	2D ep-POP	POP	1.50561	319.078
M-88	CPO-27-Ni	MOF	M-160	Zn(NDI-SEt)	MOF	1.50554	355.618
M-88	CPO-27-Ni	MOF	M-162	Zn(NDI-SOEt)	MOF	1.50554	355.618
M-86	Co-MOF-74(M)	MOF	M-27	{[Cu2(4-pmpmd)2(CH3OH)4(opd)2]*2H2O}	MOF	1.50553	231.818
M-88	CPO-27-Ni	MOF	M-119	MIL-101-NH2	MOF	1.50535	267.502
M-168	Zn-MOF-74(cycle 1)	MOF	M-148	UiO-66(Zr4+) with high concentration stearic acid	MOF	1.50531	471.303
Z-7	Na-ZSM-5	Zeolite	M-148	UiO-66(Zr4+) with high concentration stearic acid	MOF	1.50531	471.303
M-61	C4H8HoKO12 Dehydrated	MOF	M-120	MIL-101-SO3H	MOF	1.50491	453.721
M-110	Mg-MOF-74?	MOF	M-113	MIL-100(Cr)-DEG	MOF	1.50484	392.139
Z-4	K6Na6Al12O48	Zeolite	M-175	Zr-MOF-808	MOF	1.50482	560.958
M-92	CuBTC	MOF	M-27	{[Cu2(4-pmpmd)2(CH3OH)4(opd)2]*2H2O}	MOF	1.50475	197.897
M-61	C4H8HoKO12 Dehydrated	MOF	M-148	UiO-66(Zr4+) with high concentration stearic acid	MOF	1.50432	478.141
M-103	HKUST-1-F	MOF	M-114	MIL-100(Cr)-EG	MOF	1.50428	250.655
M-136	Ni-DOBDC	MOF	C-46	TpBpy	COF	1.50426	185.187
M-168	Zn-MOF-74(cycle 1)	MOF	M-149	UiO-66(Zr4+) with metal/ligand ratio 6:3	MOF	1.50389	447.546
Z-7	Na-ZSM-5	Zeolite	M-149	UiO-66(Zr4+) with metal/ligand ratio 6:3	MOF	1.50389	447.546
Z-10	Zeolite Na-A	Zeolite	M-129	MIP-200	MOF	1.50387	443.083
M-28	{[Cu2(pzdc)2(bpy)]*4H2O}	MOF	M-175	Zr-MOF-808	MOF	1.50369	397.207
M-88	CPO-27-Ni	MOF	P-22	MOPI-IV	POP	1.50363	300.041
M-110	Mg-MOF-74?	MOF	M-26	{[Cu(azpy)(glut)](H2O)2}	MOF	1.50292	356.206
M-61	C4H8HoKO12 Dehydrated	MOF	M-149	UiO-66(Zr4+) with metal/ligand ratio 6:3	MOF	1.5029	453.697
Z-10	Zeolite Na-A	Zeolite	M-71	CAU-10-OCH3	MOF	1.50251	245.801
M-174	Zr-MOF-806	MOF	C-5	AB-COF	COF	1.50247	342.888
M-86	Co-MOF-74(M)	MOF	M-77	CAU-1-NHCOCH3	MOF	1.50203	340.342
M-110	Mg-MOF-74?	MOF	P-12	DUT-93	POP	1.50188	289.9
Z-4	K6Na6Al12O48	Zeolite	M-81	Co2Cl2(BTDD)	MOF	1.50182	667.508
M-103	HKUST-1-F	MOF	C-31	MM2	COF	1.50148	237.934
M-136	Ni-DOBDC	MOF	C-15	ATFG-COF	COF	1.50144	263.999
M-92	CuBTC	MOF	M-77	CAU-1-NHCOCH3	MOF	1.50126	271.841
M-103	HKUST-1-F	MOF	C-49	TpPa-2	COF	1.5011	214.622
M-110	Mg-MOF-74?	MOF	C-50	TpPa-2	COF	1.50083	363.439
M-28	{[Cu2(pzdc)2(bpy)]*4H2O}	MOF	M-81	Co2Cl2(BTDD)	MOF	1.5007	447.572
M-86	Co-MOF-74(M)	MOF	M-40	1-LiCl	MOF	1.50059	281.5
M-103	HKUST-1-F	MOF	Carb-14	Carbon AG5-HNO3	Carbon	1.50043	195.397
Z-10	Zeolite Na-A	Zeolite	M-27	{[Cu2(4-pmpmd)2(CH3OH)4(opd)2]*2H2O}	MOF	1.50037	204.842
M-168	Zn-MOF-74(cycle 1)	MOF	C-26	CTF-c	COF	1.50026	292.666
Z-7	Na-ZSM-5	Zeolite	C-26	CTF-c	COF	1.50026	292.666
M-136	Ni-DOBDC	MOF	C-21	CE-1	COF	1.5001	186.256
